# Supplementary material for: Palladium-catalyzed substitution of (coumarinyl)methyl acetates with C-, N-, and S-nucleophiles
Source: PubMed Central journal article supplement (PMC3458738; doi:10.3762/bjoc.8.133), 2012-07-27

**Supporting Information**  
**for**  
**Palladium-catalyzed substitution of (coumarinyl)methyl acetates with**  
**C-, N-, and S-nucleophiles**

Kalicharan Chattopadhyay<sup>1,2</sup>, Erik Fenster<sup>2</sup>, Alexander J. Grenning<sup>1</sup> and Jon A. Tunge<sup>1,2\*</sup>

<sup>1</sup>Department of Chemistry, University of Kansas, 1251 Wescoe Hall Drive, Lawrence, KS 66045-7528,  
USA and <sup>2</sup>KU Chemical Methodologies and Library Development Center of Excellence, University of Kansas,  
1501 Wakarusa Drive, Lawrence, Kansas 66047, USA.

Email: Jon A. Tunge - [tunge@ku.edu](mailto:tunge@ku.edu)

*\*Corresponding author*

**Experimental data and <sup>1</sup>H, <sup>13</sup>C, and IR, and HRMS data for new compounds  
produced in batch.**

**Table of Contents:**

|                                                                            |    |
|----------------------------------------------------------------------------|----|
| <b>General information:</b>                                                | 1  |
| <b>Experimental procedures:</b>                                            | 2  |
| <b>Spectral data for compounds 2a-h, 3a-f, 4a-e, 5a-k:</b>                 | 3  |
| <b>Library experimental/representative spectral data and NMR reprints:</b> | 18 |

**General information:**

All reactions were run in flame-dried glassware under an Ar atmosphere using standard Schlenk techniques. Commercially available reagents were used without additional purification. Compound purification was effected by flash chromatography using 230 × 400 mesh, 60 Å porosity silica gel. <sup>1</sup>H NMR and <sup>13</sup>C NMR spectra were obtained on a Bruker Avance 400 and 500 DRX spectrometer and referenced to residual protio solvent signals. Structural assignments are based on <sup>1</sup>H, <sup>13</sup>C, IR, and HRMS spectroscopies.

**General Procedure for decarboxylative benzylation (DcB) reaction of coumarinyl acetates:**

In a flame-dried Schlenk tube under argon, Pd(PPh<sub>3</sub>)<sub>4</sub> (5 mol %) was added to a acetonitrile solution (1.5 mL) of coumarinyl acetate (0.16 mmol), and the solution was stirred at room temperature for 12–15 h. The reaction mixture was then concentrated in vacuo and purified directly by column chromatography with hexane/ethyl acetate (90:10) as eluent.

**General procedure for the Suzuki-coupling of coumarinyl acetates and aryl/vinyl boronic acids:**

In a flame-dried Schlenk tube under argon, Pd(PPh<sub>3</sub>)<sub>4</sub> (5 mol %) was added a dioxane solution (2 mL) of (coumarinyl)methyl acetates (0.5 mmol), boronic acid (2 equiv), K<sub>2</sub>CO<sub>3</sub> (1.5 equiv), and the solution was stirred at 90 °C for 12–15 min. The reaction mixture was then concentrated in vacuo and purified directly by column chromatography with hexane/ethyl acetate as eluent.

**General procedure for the Pd-catalyzed coupling of coumarinyl acetates and sulfinates:**

In a flame-dried Schlenk tube under argon, Pd(PPh<sub>3</sub>)<sub>4</sub> (5 mol %) was added to a dioxane solution (2 mL) of (coumarinyl)methyl acetates (0.5 mmol) and sodium salt of arylsulfinate, and the solution stirred at 90 °C for 12 h. The reaction mixture was then concentrated in vacuo and purified directly by column chromatography with hexane/ethyl acetate as eluent.

**General procedure for the Pd-catalyzed coupling of coumarinyl acetates and amines:**

In a flame-dried Schlenk tube under argon, Pd(PPh<sub>3</sub>)<sub>4</sub> (10 mol %) was added a dioxane solution (2 mL) of (coumarinyl)methyl acetates (0.5 mmol), amine (2 equiv), K<sub>2</sub>CO<sub>3</sub> (2 equiv), and the solution stirred at 90 °C for 12–15 h (secondary amine) or 24 h (primary amine). The reaction mixture was then concentrated in vacuo and purified directly by column chromatography with hexane/ethyl acetate as eluent.

## Spectral data for compounds 2a–h, 3a–f

**2a:** yellow viscous liquid

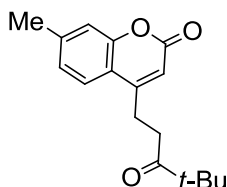

$^1\text{H}$  NMR (400 MHz,  $\text{CDCl}_3$ ):

$\delta$  ppm 7.53 (d,  $J = 8$  Hz, 1H), 7.28–7.12 (m, 2H), 6.20 (s, 1H), 3.05–3.01 (m, 2H), 2.91–2.88 (m, 2H), 2.46 (s, 3H), 1.18 (s, 9H)

$^{13}\text{C}$  NMR (125 MHz,  $\text{CDCl}_3$ ):

$\delta$  ppm 213.56, 161.11, 155.35, 153.79, 143.05, 125.54, 123.82, 117.52, 116.62, 112.81, 44.20, 34.67, 26.41, 25.56, 21.58

IR ( $\text{CH}_2\text{Cl}_2$ ):  $\nu_{\text{max}}$  1718, 1620  $\text{cm}^{-1}$

HRMS: Calcd. for  $\text{C}_{17}\text{H}_{21}\text{O}_3$  ( $\text{M} + \text{H}$ ), 273.1491; Found, 273.1365

**2b:** viscous liquid

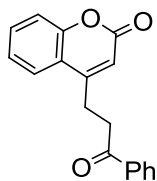

$^1\text{H}$  NMR (500 MHz,  $\text{CDCl}_3$ ):

$\delta$  ppm 7.91–7.89 (m, 2H), 7.62 (dd,  $J = 8, 1.5$  Hz, 1H), 7.53–7.39 (m, 4H), 7.28–7.22 (m, 2H), 6.25 (s, 1H), 3.35–3.32 (m, 2H), 3.20–3.17 (m, 2H)

$^{13}\text{C}$  NMR (100 MHz,  $\text{CDCl}_3$ ):

$\delta$  ppm 195.11, 158.47, 152.71, 151.42, 133.96, 131.33, 129.60, 126.52, 125.75, 122.12, 121.89, 116.78, 115.13, 111.81, 34.08, 23.18.

IR ( $\text{CH}_2\text{Cl}_2$ ): 1724, 1685  $\text{cm}^{-1}$

HRMS: Calcd. for  $\text{C}_{18}\text{H}_{14}\text{O}_3\text{Na}$  ( $\text{M} + \text{Na}$ ), 301.0841; Found, 301.0815

**2c:** viscous liquid

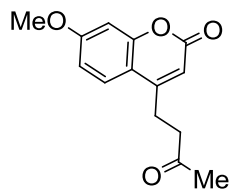

<sup>1</sup>H NMR (400 MHz, CDCl<sub>3</sub>):

δ ppm 7.45–7.43 (m, 1H), 6.78–6.76 (m, 1H), 6.70 (s, 1H), 5.98 (s, 1H), 3.78 (s, 3H), 2.94–2.91 (m, 2H), 2.79–2.76 (m, 2H), 2.15 (s, 3H).

<sup>13</sup>C NMR (100 MHz, CDCl<sub>3</sub>):

δ ppm 206.02, 162.69, 161.23, 155.49, 154.98, 125.12, 112.53, 112.45, 110.71, 101.11, 55.79, 41.20, 30.08, 25.08.

IR (CH<sub>2</sub>Cl<sub>2</sub>): 1720, 1605 cm<sup>-1</sup>.

HRMS: Calcd. for C<sub>14</sub>H<sub>15</sub>O<sub>4</sub> (M + H), 247.0970; Found, 247.0963

**2d:** yellow viscous liquid

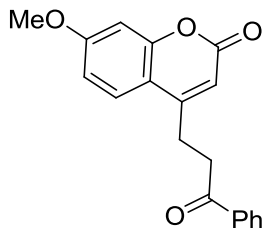

<sup>1</sup>H NMR (500 MHz, CDCl<sub>3</sub>):

δ ppm 7.91–7.89 (m, 2H), 7.53–7.50 (m, 2H), 7.42–7.39 (m, 2H), 6.79 (dd, *J* = 10.0, 5.0 Hz, 1H), 6.75 (s, 1H), 6.09 (s, 1H), 3.79 (s, 3H), 3.33–3.30 (m, 2H), 3.14–3.11 (m, 2H).

<sup>13</sup>C NMR (125 MHz, CDCl<sub>3</sub>):

δ ppm 197.53, 162.70, 161.26, 155.52, 155.26, 136.28, 133.58, 128.79, 128.03, 125.20, 112.62, 112.47, 110.84, 101.14, 55.78, 36.51, 25.55.

IR (CH<sub>2</sub>Cl<sub>2</sub>): ν<sub>max</sub> 1720, 1683, 1612 cm<sup>-1</sup>.

HRMS: Calcd. for C<sub>19</sub>H<sub>16</sub>O<sub>4</sub>Na (M + Na), 331.0946; Found, 331.0927.

**2e:** yellow viscous liquid

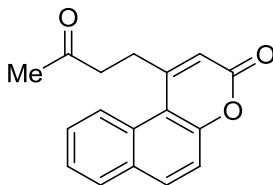

$^1\text{H}$  NMR (500 MHz,  $\text{CDCl}_3$ ):

$\delta$  ppm 8.31 (d,  $J = 5$  Hz, 1H), 7.88 (d,  $J = 10$  Hz, 1H), 7.83 (dd,  $J = 8, 1.5$  Hz, 1H), 7.57–7.54 (m, 1H), 7.48–7.45 (m, 1H), 7.36 (d,  $J = 10$  Hz, 1H), 6.27 (s, 1H), 3.45–3.42 (m, 2H), 2.85–2.82 (m, 2H). 2.14 (s, 3H).

$^{13}\text{C}$  NMR (125 MHz,  $\text{CDCl}_3$ ):

$\delta$  ppm 204.33, 158.64, 155.08, 153.30, 132.27, 129.76, 128.29, 127.90, 126.65, 123.89, 122.96, 116.33, 113.70, 111.93, 40.20, 29.56, 28.51.

IR ( $\text{CH}_2\text{Cl}_2$ ):  $\nu_{\text{max}}$  1718, 1421  $\text{cm}^{-1}$ .

HRMS: Calcd. for  $\text{C}_{17}\text{H}_{15}\text{O}_3$  ( $\text{M} + \text{H}$ ), 267.1021; Found, 267.1083.

**2f:** yellow viscous liquid

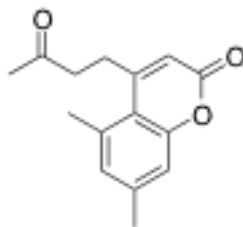

$^1\text{H}$  NMR (500 MHz,  $\text{CDCl}_3$ ):

$\delta$  ppm; 6.95 (s, 1H), 6.83 (s, 1H), 6.04 (s, 1H), 3.15–3.12 (m, 2H), 2.75–2.72 (m, 2H), 2.60 (s, 3H), 2.30 (s, 3H), 2.16 (s, 3H).

$^{13}\text{C}$  NMR (125 MHz,  $\text{CDCl}_3$ ):

$\delta$  ppm 205.89, 160.66, 156.75, 155.33, 141.97, 135.74, 130.12, 116.45, 116.03, 113.86, 42.36, 30.13, 29.37, 24.34, 21.13.

IR ( $\text{CH}_2\text{Cl}_2$ ):  $\nu_{\text{max}}$  1735, 1714, 1604  $\text{cm}^{-1}$ .

HRMS: Calcd. for  $\text{C}_{15}\text{H}_{17}\text{O}_3$  ( $\text{M} + \text{H}$ ), 245.1178; Found, 245.1159.

**2g:** viscous liquid

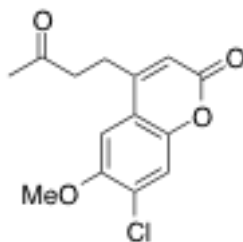

<sup>1</sup>H NMR (500 MHz, CDCl<sub>3</sub>):

δ ppm 7.52 (s, 1H), 7.14 (s, 1H), 6.13 (s, 1H), 2.95–2.92 (m, 2H), 2.81–2.78 (m, 2H), 2.38 (s, 3H), 2.17 (s, 3H)

<sup>13</sup>C NMR (125 MHz, CDCl<sub>3</sub>):

δ ppm 205.67, 160.37, 153.70, 151.94, 140.74, 130.28, 123.94, 191.21, 118.14, 113.79, 40.77, 30.07, 24.82, 20.50.

IR (CH<sub>2</sub>Cl<sub>2</sub>): 1731, 1701, 1610 cm<sup>-1</sup>.

HRMS: Calcd. for C<sub>14</sub>H<sub>13</sub>ClO<sub>3</sub>Na (M + Na), 287.0451; Found, 287.0444

**2h:** yellow viscous liquid

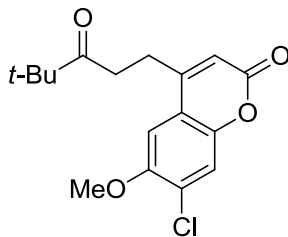

<sup>1</sup>H NMR (500 MHz, CDCl<sub>3</sub>):

δ ppm 7.54 (s, 1H), 6.78 (s, 1H), 6.05 (s, 1H), 3.89 (s, 3H), 2.91–2.88 (m, 2H) 2.84–2.81 (m, 2H), 1.11 (s, 9H).

<sup>13</sup>C NMR (125 MHz, CDCl<sub>3</sub>):

δ ppm 211.92, 159.17, 156.19, 153.17, 152.37, 123.53, 117.70, 111.46, 110.05, 99.17, 55.23, 42.76, 32.86, 24.98, 23.98.

IR (CH<sub>2</sub>Cl<sub>2</sub>): ν<sub>max</sub> 1720, 1690, 1610 cm<sup>-1</sup>.

HRMS: Calcd. for C<sub>17</sub>H<sub>20</sub>ClO<sub>4</sub> (M + H), 323.1050; Found, 323.1036.

**3a:** Colorless viscous liquid

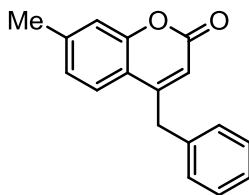

$^1\text{H}$  NMR (400,  $\text{CDCl}_3$ ):

$\delta$  7.53 (d,  $J = 8.0$  Hz, 1H), 7.36–7.22 (m, 5H), 7.13 (s, 1H), 7.07 (d,  $J = 8.0$  Hz, 1H), 6.07 (s, 1H), 4.09 (s, 2H), 2.43 (s, 3H) ppm.

$^{13}\text{C}$  NMR (100 MHz,  $\text{CDCl}_3$ ):

$\delta$  161.25, 154.73, 153.78, 142.96, 136.13, 129.08, 128.97, 127.22, 125.47, 124.40, 117.34, 116.83, 114.53, 38.02, 21.60 ppm.

IR ( $\text{CH}_2\text{Cl}_2$ ):  $\nu_{\text{max}}$  3028, 1712, 1620  $\text{cm}^{-1}$

HRMS: Calcd. for  $\text{C}_{17}\text{H}_{14}\text{O}_2\text{Na}$  ( $\text{M} + \text{Na}$ ) 273.0892; Found 273.0883.

**3b:** Colorless viscous liquid;

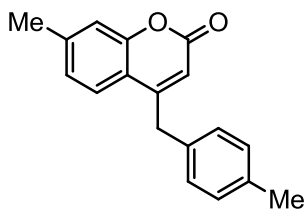

$^1\text{H}$  NMR (400,  $\text{CDCl}_3$ ):

$\delta$  7.55 (d,  $J = 8.0$  Hz, 1H), 7.17–7.07 (m, 6H), 6.09 (s, 1H), 4.06 (s, 2H), 2.45 (s, 3H), 2.36 (s, 3H) ppm.

$^{13}\text{C}$  NMR (100 MHz,  $\text{CDCl}_3$ ):

$\delta$  161.32, 154.94, 153.81, 142.88, 136.86, 133.00, 129.64, 128.92, 125.42, 124.39, 117.35, 116.88, 114.46, 37.66, 21.60, 21.07 ppm.

IR ( $\text{CH}_2\text{Cl}_2$ ):  $\nu_{\text{max}}$  3010, 1712, 1620  $\text{cm}^{-1}$

HRMS: Calcd. for  $\text{C}_{18}\text{H}_{16}\text{O}_2\text{Na}$  ( $\text{M} + \text{Na}$ ) 287.1048; Found 287.1025.

**3c:** Colorless solid

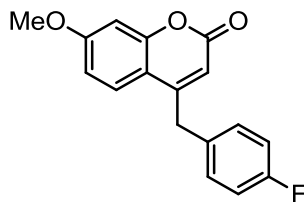

$^1\text{H}$  NMR (400,  $\text{CDCl}_3$ ):

$\delta$  7.51 (d,  $J = 8.0$  Hz, 1H), 7.21–7.17 (m, 2H), 7.04–7.00 (m, 2H), 6.83–6.81 (m, 2H), 5.95 (s, 1H), 4.05 (s, 2H), 3.87 (s, 3H) ppm.

$^{13}\text{C}$  NMR (100 MHz,  $\text{CDCl}_3$ ):

$\delta$  162.65, 161.94 (d,  $J_{\text{C-F}} = 244$  Hz), 161.29, 155.53, 154.57, 131.84 (d,  $J_{\text{C-F}} = 4$  Hz), 130.57 (d,  $J_{\text{C-F}} = 8$  Hz), 125.55, 115.85 (d,  $J_{\text{C-F}} = 22$  Hz), 112.59, 112.42, 112.40, 101.03, 55.76, 37.29 ppm.

IR ( $\text{CH}_2\text{Cl}_2$ ):  $\nu_{\text{max}}$  1711, 1611  $\text{cm}^{-1}$ .

HRMS: Calcd. for  $\text{C}_{17}\text{H}_{14}\text{FO}_3$  (M + H) 285.0927; Found 285.0902.

**3d:** Colorless viscous liquid

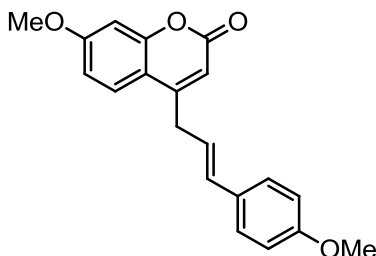

$^1\text{H}$  NMR (400,  $\text{CDCl}_3$ ):

$\delta$  7.60 (d,  $J = 8$  Hz, 1H), 7.32–7.28 (m, 2H), 6.88–6.85 (m, 4H), 6.51 (d,  $J = 16.0$  Hz, 1H), 6.23–6.13 (m, 2H), 3.89 (s, 3H), 3.82 (s, 3H), 3.63 (d,  $J = 8$  Hz, 2H) ppm.

$^{13}\text{C}$  NMR (100 MHz,  $\text{CDCl}_3$ ):

$\delta$  162.62, 161.48, 159.34, 155.55, 154.66, 133.45, 129.35, 127.44, 125.51, 121.70, 114.04, 112.80, 112.40, 111.53, 101.02, 55.77, 55.32, 35.15 ppm.

IR ( $\text{CH}_2\text{Cl}_2$ ):  $\nu_{\text{max}}$  2956, 1718, 1610  $\text{cm}^{-1}$

HRMS: Calcd. for  $\text{C}_{20}\text{H}_{19}\text{O}_4$  (M + H) 323.1283; Found 323.1280.



**3e:** Colorless viscous liquid

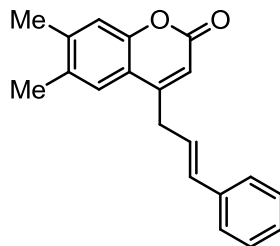

$^1\text{H}$  NMR (400,  $\text{CDCl}_3$ ):

$\delta$  7.38–7.26 (m, 6H), 7.13 (s, 1H), 6.57 (d,  $J = 16.0$  Hz, 1H), 6.37–6.29 (m, 2H), 3.66 (d,  $J = 8$  Hz, 2H), 2.35 (s, 3H), 2.33 (s, 3H) ppm.

$^{13}\text{C}$  NMR (100 MHz,  $\text{CDCl}_3$ ):

$\delta$  161.44, 154.28, 152.09, 141.84, 136.61, 132.98, 128.65, 127.80, 126.28, 124.54, 124.01, 117.74, 116.85, 113.56, 34.88, 20.21, 19.55 ppm.

IR ( $\text{CH}_2\text{Cl}_2$ ):  $\nu_{\text{max}}$  3024, 1714, 1622  $\text{cm}^{-1}$ .

HRMS: Calcd. for  $\text{C}_{20}\text{H}_{19}\text{O}_2$  ( $\text{M} + \text{H}$ ) 291.1385; Found 291.1357.

**3f:** Colorless viscous liquid

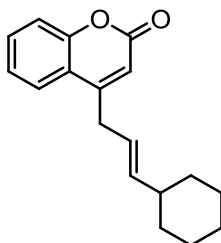

$^1\text{H}$  NMR (400,  $\text{CDCl}_3$ ):

$\delta$  7.66 (d,  $J = 4.0$  Hz, 1H), 7.56–7.52 (m, 1H), 7.37–7.28 (m, 2H), 6.32 (s, 1H), 5.66–5.61 (m, 1H), 5.55–5.49 (m, 1H), 3.48 (d,  $J = 8$  Hz, 2H), 2.00 (bs, 1H), 1.75–1.65 (m, 4H), 1.33–1.05 (m, 6H) ppm.

$^{13}\text{C}$  NMR (100 MHz,  $\text{CDCl}_3$ ):

$\delta$  161.14, 155.11, 153.65, 141.77, 131.62, 124.46, 124.12, 121.13, 119.34, 117.22, 114.28, 40.74, 34.79, 32.82, 26.09, 25.96 ppm.

IR ( $\text{CH}_2\text{Cl}_2$ ):  $\nu_{\text{max}}$  1728, 1604, 1413  $\text{cm}^{-1}$ .

HRMS: Calcd. for  $\text{C}_{18}\text{H}_{21}\text{O}_2$  ( $\text{M} + \text{H}$ ) 269.1542; Found 269.1519.

**4a:** yellow viscous liquid

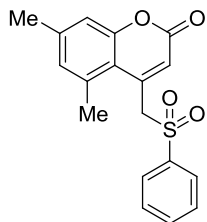

$^1\text{H}$  NMR (500,  $\text{CDCl}_3$ ):

$\delta$  ppm 7.74–7.72 (m, 2H), 7.64–7.61 (m, 1H), 7.51–7.48 (m, 2H), 6.95 (s, 1H), 6.84 (s, 1H), 5.89 (s, 1H), 4.65 (s, 2H), 2.73 (s, 3H), 2.30 (s, 3H).

$^{13}\text{C}$  NMR (125 MHz,  $\text{CDCl}_3$ ):

$\delta$  159.22, 155.42, 143.31, 142.92, 137.39, 135.79, 134.70, 130.61, 129.54, 128.57, 120.26, 116.55, 114.95, 61.11, 24.66, 21.24 ppm.

IR ( $\text{CH}_2\text{Cl}_2$ ):  $\nu_{\text{max}}$  1718, 1618, 1446  $\text{cm}^{-1}$ .

HRMS: Calcd. for  $\text{C}_{18}\text{H}_{16}\text{O}_4\text{SNa}$  (M + Na) 351.0667; Found 351.0642

**4b:** yellow viscous liquid

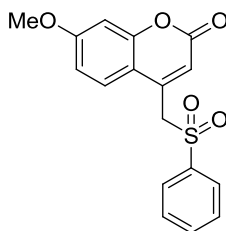

$^1\text{H}$  NMR (500,  $\text{CDCl}_3$ ):

$\delta$  ppm 7.76–7.74 (m, 2H), 7.61–7.58 (m, 1H), 7.48–7.43 (m, 3H), 6.77–6.72 (m, 2H), 5.78 (s, 1H), 4.39 (s, 1H), 3.80 (s, 3H).

$^{13}\text{C}$  NMR (125 MHz,  $\text{CDCl}_3$ ):

$\delta$  163.20, 159.88, 155.68, 142.73, 137.29, 134.67, 129.47, 128.55, 126.35, 116.13, 112.64, 111.54, 101.14, 58.60, 55.87 ppm.

IR ( $\text{CH}_2\text{Cl}_2$ ):  $\nu_{\text{max}}$  1710, 1610  $\text{cm}^{-1}$ .

HRMS: Calcd. for  $\text{C}_{17}\text{H}_{14}\text{O}_5\text{SNa}$  (M + Na) 353.0460; Found 353.0466

**4c:** yellow viscous liquid

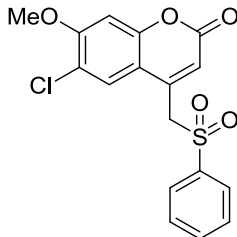

<sup>1</sup>H NMR (500, CDCl<sub>3</sub> DMSO-D6):

δ 7.78 (d, *J* = 8 Hz, 2H), 7.62 (t, *J* = 7.5 Hz, 1H), 7.50–7.46 (m, 3H), 6.80 (s, 1H), 5.99 (s, 1H), 4.50 (s, 2H), 3.90 (s, 3H) ppm.

<sup>13</sup>C NMR (125 MHz, CDCl<sub>3</sub>):

δ 157.44, 156.16, 152.11, 140.38, 135.64, 132.88, 127.62, 126.63, 124.23, 117.33, 115.37, 109.95, 98.63, 56.29, 54.93 ppm.

IR (CH<sub>2</sub>Cl<sub>2</sub>): ν<sub>max</sub> 1718, 1635 cm<sup>-1</sup>.

HRMS: Calcd. for C<sub>17</sub>H<sub>14</sub>ClO<sub>5</sub>S (M + H) 365.0251; Found 365.0243

**4d:** yellow viscous liquid

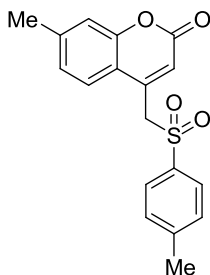

<sup>1</sup>H NMR (500, CDCl<sub>3</sub>):

δ 7.70 (d, *J* = 8.5 Hz, 2H), 7.55 (d, *J* = 8 Hz, 1H), 7.34 (d, *J* = 8.5 Hz, 2H), 7.15–7.11 (m, 2H), 5.93 (s, 1H), 4.48 (s, 2H), 2.46 (s, 3H), 2.45 (s, 3H); ppm.

<sup>13</sup>C NMR (125 MHz, CDCl<sub>3</sub>):

δ 159.78, 153.89, 145.94, 143.99, 142.91, 134.29, 130.09, 128.59, 125.70, 125.11, 118.36, 117.45, 115.63, 58.55, 21.74, 21.67.

IR (CH<sub>2</sub>Cl<sub>2</sub>): ν<sub>max</sub> 1716, 1620 cm<sup>-1</sup>.

HRMS: Calcd. for C<sub>18</sub>H<sub>17</sub>O<sub>4</sub>S (M + H) 329.0848; Found 329.0862

**4e:** yellow viscous liquid

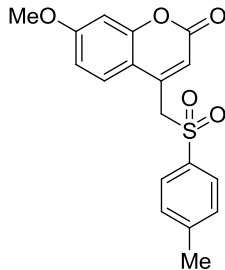

$^1\text{H}$  NMR (500,  $\text{CDCl}_3$ ):

$\delta$  7.61 (d,  $J = 8.5$  Hz, 2H), 7.48 (d,  $J = 8.5$  Hz, 1H), 7.25 (d,  $J = 8.5$  Hz, 2H), 6.78–6.74 (m, 2H), 5.74 (s, 1H), 4.36 (s, 2H), 3.80 (s, 3H), 2.36 (s, 3H) ppm.

$^{13}\text{C}$  NMR (125 MHz,  $\text{CDCl}_3$ ):

$\delta$  161.07, 157.82, 153.56, 143.78, 140.82, 132.19, 127.94, 126.44, 124.38, 113.90, 110.46, 109.49, 99.02, 56.60, 53.74, 19.60 ppm.

IR ( $\text{CH}_2\text{Cl}_2$ ):  $\nu_{\text{max}}$  1716, 1608  $\text{cm}^{-1}$ .

HRMS: Calcd. for  $\text{C}_{18}\text{H}_{16}\text{O}_5\text{SNa}$  ( $\text{M} + \text{Na}$ ) 367.0616; Found 367.0604

**5a:** yellow solid

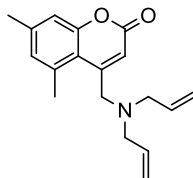

$^1\text{H}$  NMR ( $\text{CDCl}_3$ ):

$\delta$  6.93 (s, 1H), 6.79 (s, 1H), 6.74 (s, 1H), 5.81–5.74 (m, 2H), 5.15–5.07 (m, 4H), 3.75 (s, 2H), 3.10–3.08 (m, 4H), 2.58 (s, 3H), 2.28 (s, 3H) ppm.

$^{13}\text{C}$  NMR (125 MHz,  $\text{CDCl}_3$ ):

$\delta$  161.98, 156.37, 155.98, 142.23, 136.56, 135.60, 130.28, 118.66, 116.82, 116.76, 114.61, 57.76, 57.60, 25.13, 21.77 ppm.

IR ( $\text{CH}_2\text{Cl}_2$ ):  $\nu_{\text{max}}$  3018, 1724  $\text{cm}^{-1}$

HRMS: Calcd. for  $\text{C}_{18}\text{H}_{22}\text{NO}_2$  ( $\text{M} + \text{H}$ ) 284.1651; Found 284.1627.

**5b:** yellow liquid

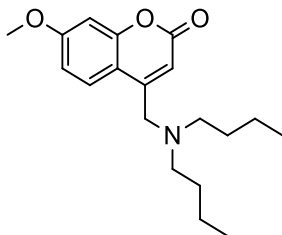

$^1\text{H}$  NMR ( $\text{CDCl}_3$ ):

$\delta$  ppm 7.67 (d,  $J = 8.5$  Hz, 1H), 6.76–6.74 (m, 2H), 6.39 (s, 1H), 3.79 (s, 3H), 3.57 (s, 2H), 2.39 (t,  $J = 7$  Hz, 4H), 1.38–1.35 (m, 4H), 1.24–1.29 (m, 4H), 0.81 (t,  $J = 7.5$  Hz, 6H).

$^{13}\text{C}$  NMR (125 MHz,  $\text{CDCl}_3$ ):

$\delta$  160.38, 159.78, 153.50, 152.46, 123.65, 110.59, 110.01, 109.41, 98.74, 53.85, 53.69, 52.36, 27.25, 18.57, 12.04 ppm

IR ( $\text{CH}_2\text{Cl}_2$ ):  $\nu_{\text{max}}$  3018, 1724, 1612  $\text{cm}^{-1}$

HRMS: Calcd. for  $\text{C}_{19}\text{H}_{28}\text{NO}_3$  ( $M + H$ ) 318.2069, Found 318.2058.

**5c:** yellow liquid

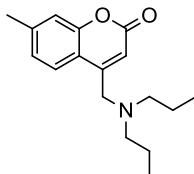

$^1\text{H}$  NMR ( $\text{CDCl}_3$ ):

$\delta$  7.61 (d,  $J = 8$  Hz, 1H), 7.06 (s, 1H), 7.00–6.98 (m, 1H), 6.50 (s, 1H), 3.60 (s, 3H), 2.38–2.35 (m, 7H), 1.44–1.39 (m, 4H), 0.79 (t,  $J = 7.5$  Hz, 6H) ppm.

$^{13}\text{C}$  NMR (125 MHz,  $\text{CDCl}_3$ ):

$\delta$  161.66, 154.30, 153.77, 142.57, 125.10, 124.18, 117.14, 116.57, 113.37, 56.63, 55.67, 21.60, 20.31, 11.85 ppm.

IR ( $\text{CH}_2\text{Cl}_2$ ):  $\nu_{\text{max}}$  2958, 1724  $\text{cm}^{-1}$ .

HRMS: Calcd. for  $\text{C}_{17}\text{H}_{24}\text{NO}_2$  ( $M + H$ ) 274.1807; Found 274.1875.

**5d:** Yellow viscous liquid

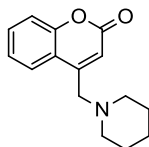

<sup>1</sup>H NMR (500, CDCl<sub>3</sub>):

δ 7.76 (dd, *J* = 8, 1.5 Hz, 1H), 7.45–7.41 (m, 1H), 7.26–7.17 (m, 2H), 6.47 (s, 1H), 3.51 (s, 1H), 2.40 (bs, 4H), 1.55–1.50 (m, 4H), 1.39–1.38 (m, 2H) ppm.

<sup>13</sup>C NMR (125 MHz, CDCl<sub>3</sub>):

δ 161.19, 153.74, 152.67, 131.50, 124.77, 124.01, 119.04, 116.98, 114.59, 59.63, 55.02, 26.01, 24.09 ppm.

IR (CH<sub>2</sub>Cl<sub>2</sub>): ν<sub>max</sub> 3010, 1730 cm<sup>-1</sup>

HRMS: Calcd. for C<sub>15</sub>H<sub>18</sub>NO<sub>2</sub> (M + H) 244.1338; Found 244.1308.

**5e:** yellow liquid

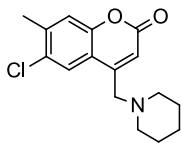

<sup>1</sup>H NMR (CDCl<sub>3</sub>):

δ 7.76 (s, 1H), 7.13 (s, 1H), 6.44 (s, 1H), 3.47 (s, 2H), 2.39–2.38 (m, 7H), 1.56–1.52 (m, 4H), 1.40–1.39 (m, 2H) ppm.

<sup>13</sup>C NMR (125 MHz, CDCl<sub>3</sub>):

δ 158.67, 149.97, 149.54, 138.17, 127.74, 122.57, 116.67, 115.95, 112.49, 57.44, 52.81, 23.81, 21.89, 18.39 ppm.

IR (CH<sub>2</sub>Cl<sub>2</sub>): ν<sub>max</sub> 1733, 1521 cm<sup>-1</sup>.

HRMS: Calcd. for C<sub>16</sub>H<sub>19</sub>ClNO<sub>2</sub> (M + H) 292.1104; Found 292.1070.

**5f:** yellow viscous liquid

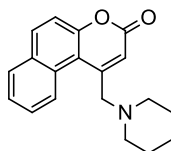

$^1\text{H}$  NMR (400,  $\text{CDCl}_3$ ):

$\delta$  ppm 8.68 (d,  $J = 8.4$  Hz, 1H), 7.98 (d,  $J = 8.8$ , 1H), 7.92 (dd,  $J = 8, 1.6$  Hz, 1H), 7.68–7.64 (m, 1H), 7.59–7.55 (m, 1H), 7.49 (d,  $J = 8.8$  Hz, 1H), 6.86 (s, 1H), 3.93 (s, 2H), 2.60 (m, 4H), 1.66 (m, 4H), 1.53 (m, 2H).

$^{13}\text{C}$  NMR (125 MHz,  $\text{CDCl}_3$ ):

$\delta$  ppm 160.92, 154.89, 154.19, 133.49, 131.28, 129.79, 129.33, 127.62, 126.65, 125.46, 117.79, 116.20, 114.62, 63.71, 54.68, 26.01, 24.19.

IR ( $\text{CH}_2\text{Cl}_2$ ):  $\nu_{\text{max}}$  3018, 1730  $\text{cm}^{-1}$ .

HRMS: Calcd. for  $\text{C}_{19}\text{H}_{20}\text{NO}_2$  (M + H) 294.1494; Found 294.1482.

**5g:** yellow solid;

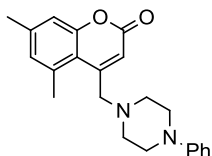

$^1\text{H}$  NMR (400,  $\text{CDCl}_3$ ):

$\delta$  7.31–7.27 (m, 2H), 7.05 (s, 1H), 6.95–6.88 (m, 4H), 6.56 (s, 1H), 3.74 (s, 2H), 3.23 (t,  $J = 4.8$  Hz, 4H), 2.79 (s, 3H), 2.72 (t,  $J = 4.8$  Hz, 4H), 2.39 (s, 3H) ppm.

$^{13}\text{C}$  NMR (100 MHz,  $\text{CDCl}_3$ )  $\delta$  160.97, 155.61, 153.12, 151.13, 141.89, 136.61, 129.78, 129.16, 119.90, 116.15, 115.99, 115.84 ppm.

IR ( $\text{CH}_2\text{Cl}_2$ ):  $\nu_{\text{max}}$  2821, 1722  $\text{cm}^{-1}$ .

HRMS: Calcd. for  $\text{C}_{22}\text{H}_{25}\text{N}_2\text{O}_2$  (M + H) 349.1916; Found 349.1908.

**5h:** yellow solid liquid

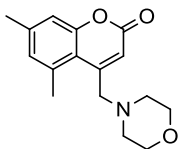

$^1\text{H}$  NMR (500,  $\text{CDCl}_3$ ):

$\delta$  6.93 (s, 1H), 6.83 (s, 1H), 6.43 (s, 1H), 3.64 (t,  $J = 4.5$  Hz, 4H), 3.59 (s, 2H), 2.67 (s, 3H), 2.46 (s, 4H), 2.29 (s, 3H) ppm.

$^{13}\text{C}$  NMR (125 MHz,  $\text{CDCl}_3$ ):

$\delta$  160.82, 155.58, 152.72, 141.89, 136.51, 129.74, 116.08, 115.90, 115.85, 66.87, 62.56, 53.63, 23.42, 21.14 ppm.

IR ( $\text{CH}_2\text{Cl}_2$ ):  $\nu_{\text{max}}$  3018, 1724, 1618  $\text{cm}^{-1}$ .

HRMS: Calcd. for  $\text{C}_{16}\text{H}_{20}\text{N}_3$  (M + H) 274.1443; Found 274.1422.

**5i:** yellow viscous liquid

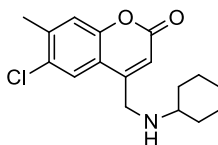

$^1\text{H}$  NMR (400,  $\text{CDCl}_3$ ):

$\delta$  7.67 (s, 1H), 7.22 (s, 1H), 6.58 (s, 1H), 3.96 (s, 2H), 2.57–2.51 (m, 1H), 2.47 (s, 3H), 1.98–1.95 (m, 2H), 1.79–1.76 (m, 2H), 1.35–1.12 (m, 6H) ppm.

$^{13}\text{C}$  NMR (100 MHz,  $\text{CDCl}_3$ ):

$\delta$  160.86, 153.66, 152.02, 140.32, 130.01, 123.92, 119.02, 117.79, 113.36, 56.72, 46.55, 33.65, 26.04, 24.92, 20.53 ppm.

IR ( $\text{CH}_2\text{Cl}_2$ ):  $\nu_{\text{max}}$  3681, 3018, 1521  $\text{cm}^{-1}$ .

HRMS: Calcd. for  $\text{C}_{17}\text{H}_{21}\text{ClNO}_2$  (M + H) 306.1261; Found 306.1241



**5j:** yellow viscous liquid

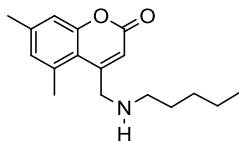

$^1\text{H}$  NMR ( $\text{CDCl}_3$ ):

$\delta$  7.03 (s, 1H), 6.90 (s, 1H), 6.55 (s, 1H), 4.03 (s, 2H), 2.73–2.69 (m, 4H), 2.38 (s, 3H), 1.55 (t,  $J = 9$  Hz, 2H), 1.36–1.33 (m, 4H), 0.92 (m, 3H) ppm.

$^{13}\text{C}$  NMR (125 MHz,  $\text{CDCl}_3$ ):

$\delta$  161.18, 155.93, 155.43, 141.68, 136.08, 129.71, 116.14, 115.88, 113.51, 53.42, 49.87, 29.87, 29.48, 23.74, 22.61, 21.14, 14.06 ppm.

IR ( $\text{CH}_2\text{Cl}_2$ ):  $\nu_{\text{max}}$  1724, 1691  $\text{cm}^{-1}$ .

HRMS: Calcd. for  $\text{C}_{17}\text{H}_{24}\text{NO}_2$  ( $\text{M} + \text{H}$ ) 274.1807 Found 274.1766.

**5k:** yellow viscous liquid;

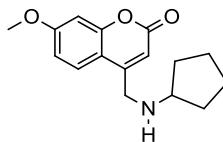

$^1\text{H}$  NMR (400,  $\text{CDCl}_3$ ):

7.60 (d,  $J = 8$  Hz, 1H), 6.87–6.82 (m, 2H), 6.41 (s, 1H), 3.91 (s, 2H), 3.88 (s, 3H), 3.20–3.17 (m, 1H), 1.91–1.85 (m, 2H), 1.76–1.70 (m, 2H), 1.61–1.55 (m, 2H), 1.45–1.38 (m, 2H) ppm.

$^{13}\text{C}$  NMR (125 MHz,  $\text{CDCl}_3$ ):

$\delta$  160.50, 159.61, 153.55, 152.34, 123.08, 110.35, 110.23, 108.40, 98.96, 57.79, 53.76, 46.40, 31.19, 21.97 ppm.

IR ( $\text{CH}_2\text{Cl}_2$ ):  $\nu_{\text{max}}$  17,20, 1612  $\text{cm}^{-1}$ .

HRMS: Calcd. for  $\text{C}_{16}\text{H}_{20}\text{NO}_3$  ( $\text{M} + \text{H}$ ) 274.1443; Found 274.1396.

**Library experimental/representative spectral data and NMR reprints**

## Experimental procedure

In the appropriate reactor position in the Chemspeed SLT1000 (4C × 16A = 64 member library) was added 96.7 mg of potassium carbonate (0.700 mmol), 2.50 mL of a 0.140 M (0.350 mmol) solution in dioxane of the coumarin (C), 3.30 mL of a 0.0105 M (0.0105 mmol) solution in dioxane of the tetrakis(triphenylphosphine)palladium and 0.66 mL of a 0.800 M (0.525 mmol) solution in dioxane of the amine (A), and the reaction mixture was vortex shaken at 90 °C for 16 hours. The reaction mixtures were concentrated, ethyl acetate (2 mL) was added to the residues and the resulting solutions were gravity filtered through SPE-Si (400 mg) into the appropriate CCT tubes. The process was repeated twice (2 × 2 mL), the filtrates were concentrated and the resulting residues were purified by LC-MS.

<sup>1</sup>H, <sup>13</sup>C NMR spectra were recorded on an Avance AV-III 500 with a dual carbon/proton (CPDUL) cryoprobe operating at 500 MHz and 125 MHz respectively. Infrared (IR) spectra were obtained using a Perkin-Elmer Spectrum 100 FT-IR spectrometer with a UATR application.

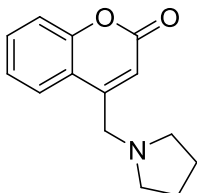

C1A5

**4-(Pyrrolidin-1-ylmethyl)-2H-chromen-2-one:** <sup>1</sup>H NMR (500 MHz, CDCl<sub>3</sub>) δ 7.82–7.80 (m, 1H), 7.52–7.49 (m, 1H), 7.34–7.26 (m, 2H), 6.54 (d, *J* = 1 Hz, 1H), 3.79 (d, *J* = 1 Hz, 2H), 2.65–2.62 (m, 4H), 1.84–1.82 (m, 4H) ppm; <sup>13</sup>C NMR (125 MHz, CDCl<sub>3</sub>) δ 158.83, 151.32, 150.55, 129.22, 122.31, 121.76, 116.47, 114.66, 112.10, 54.10, 52.09, 21.32 ppm; IR (CH<sub>2</sub>Cl<sub>2</sub>): ν 1717, 1617 cm<sup>-1</sup>; HRMS: Calcd for C<sub>14</sub>H<sub>16</sub>NO<sub>2</sub> (M + H) 230.1136; found: 230.1179.

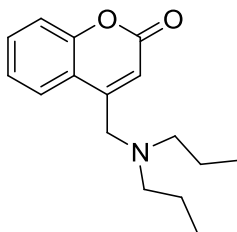

C1A7

**4-((Dipropylamino)methyl)-2H-chromen-2-one:**  $^1\text{H}$  NMR (500 MHz,  $\text{CDCl}_3$ )  $\delta$  7.83–7.81 (m, 1H), 7.52–7.49 (m, 1H), 7.33–7.25 (m, 2H), 6.66 (t,  $J = 1\text{ Hz}$ , 1H), 3.72 (d,  $J = 1\text{ Hz}$ , 2H), 2.46 (t,  $J = 7.5\text{ Hz}$ , 4H), 1.54–1.46 (m, 4H), 0.88 (t,  $J = 7.5\text{ Hz}$ , 6H) ppm;  $^{13}\text{C}$  NMR (125 MHz,  $\text{CDCl}_3$ )  $\delta$  160.97, 153.90, 153.25, 131.11, 124.08, 123.58, 118.58, 116.60, 114.02, 56.24, 55.21, 19.91, 11.46 ppm; IR ( $\text{CH}_2\text{Cl}_2$ ):  $\nu$  1724, 1623, 1550  $\text{cm}^{-1}$ ; HRMS: Calcd for  $\text{C}_{16}\text{H}_{22}\text{NO}_2$  (M + H) 260.1606; found 260.1649.

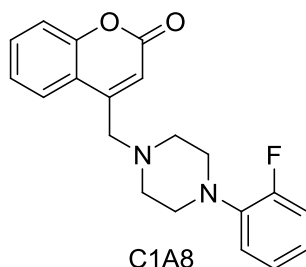

**4-((4-(2-Fluorophenyl)piperazin-1-yl)methyl)-2H-chromen-2-one:**  $^1\text{H}$  NMR (500 MHz,  $\text{CDCl}_3$ )  $\delta$  7.85–7.83 (m, 1H), 7.55–7.52 (m, 1H), 7.36–7.34 (m, 1H), 7.31–7.17 (m, 1H), 7.05–6.93 (m, 4H), 6.60 (s, 1H), 3.72 (d,  $J = 5\text{ Hz}$ , 2H), 3.15–3.13 (m, 4H), 2.76–2.74 (m, 4H) ppm;  $^{13}\text{C}$  NMR (125 MHz,  $\text{CDCl}_3$ )  $\delta$  161.03, 155.72 (d,  $J_{\text{CF}} = 244\text{ Hz}$ ), 153.82, 151.86, 139.9 (d,  $J_{\text{CF}} = 8.7\text{ Hz}$ ), 131.75, 124.75, 124.52 (d,  $J_{\text{CF}} = 2.5\text{ Hz}$ ), 124.16, 122.64 (d,  $J_{\text{CF}} = 7.5\text{ Hz}$ ), 118.93 (d,  $J_{\text{CF}} = 17.5\text{ Hz}$ ), 118.86, 117.12, 116.15 (d,  $J_{\text{CF}} = 20\text{ Hz}$ ), 114.94, 58.84, 53.60, 50.55, 50.52; IR ( $\text{CH}_2\text{Cl}_2$ ):  $\nu$  1719, 1624, 1605  $\text{cm}^{-1}$ ; HRMS: Calcd for  $\text{C}_{20}\text{H}_{20}\text{FN}_2\text{O}_2$  (M + H) 339.1464; found 339.1526.

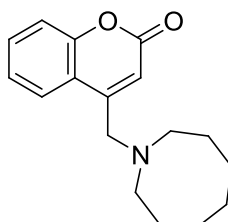

**4-(Azocan-1-ylmethyl)-2H-chromen-2-one:**  $^1\text{H}$  NMR (500 MHz,  $\text{CDCl}_3$ )  $\delta$  7.89–7.87 (m, 1H), 7.52–7.49 (m, 1H), 7.34–7.27 (m, 2H), 6.50 (s, 1H), 3.75 (d,  $J = 5\text{ Hz}$ , 2H), 2.67–2.64 (m, 4H), 1.60–1.55 (m, 10H) ppm;  $^{13}\text{C}$  NMR (125 MHz,  $\text{CDCl}_3$ )  $\delta$  160.19, 152.76, 152.74, 130.55, 124.31, 122.91, 118.04, 115.94, 113.98, 59.33, 53.95, 26.77, 26.36, 24.84 ppm; IR ( $\text{CH}_2\text{Cl}_2$ ):  $\nu$  1720, 1623, 1605,  $\text{cm}^{-1}$ ; HRMS: Calcd for  $\text{C}_{17}\text{H}_{22}\text{NO}_2$  (M + H) 272.1606; found: 272.1658.

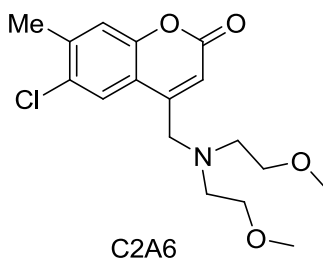

**4-((bis(2-Methoxyethyl)amino)methyl)-6-chloro-7-methyl-2H-chromen-2-one:**  $^1\text{H}$  NMR (500 MHz,  $\text{CDCl}_3$ )  $\delta$  7.94 (s, 1H), 7.19 (d,  $J = 1$  Hz, 1H), 6.59 (s, 1H), 3.89 (d,  $J = 5$  Hz, 2H), 3.49 (t,  $J = 5$  Hz, 4H), 3.33 (s, 6H), 2.82 (t,  $J = 5$  Hz, 4H), 2.45 (s, 3H) ppm;  $^{13}\text{C}$  NMR (125 MHz,  $\text{CDCl}_3$ )  $\delta$  160.90, 153.03, 152.06, 140.21, 129.86, 125.01, 118.69, 117.98, 114.70, 71.39, 58.82, 56.36, 54.42, 20.52 ppm; IR ( $\text{CH}_2\text{Cl}_2$ ):  $\nu$  1731, 1616  $\text{cm}^{-1}$ ; HRMS: Calcd for  $\text{C}_{17}\text{H}_{23}\text{ClNO}_4$  (M + H) 340.1271; found: 340.1326.

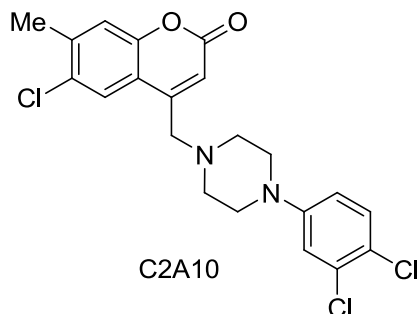

**6-Chloro-4-((4-(3,4-dichlorophenyl)piperazin-1-yl)methyl)-7-methyl-2H-chromen-2-one:**  $^1\text{H}$  NMR (500 MHz,  $\text{CDCl}_3$ )  $\delta$  7.81 (s, 1H), 7.28–7.26 (m, 1H), 7.22 (s, 1H), 6.96 (d,  $J = 3$  Hz, 1H), 6.75–6.73 (m, 1H), 6.53 (s, 1H), 3.65 (s, 2H), 3.21 (t,  $J = 5$  Hz, 4H), 2.69 (t,  $J = 5$  Hz, 4H), 2.46 (s, 3H) ppm;  $^{13}\text{C}$  NMR (125 MHz,  $\text{CDCl}_3$ )  $\delta$  160.58, 152.17, 150.63, 150.47, 140.70, 132.82, 130.48, 130.07, 124.62, 122.44, 118.97, 117.78, 117.41, 115.45, 115.00, 58.77, 53.11, 48.74, 20.60 ppm; IR ( $\text{CH}_2\text{Cl}_2$ ):  $\nu$  1728, 1616, 1592  $\text{cm}^{-1}$ ; HRMS: Calcd for  $\text{C}_{21}\text{H}_{20}\text{Cl}_3\text{N}_2\text{O}_2$  (M + H) 437.0546; found: 437.0567.

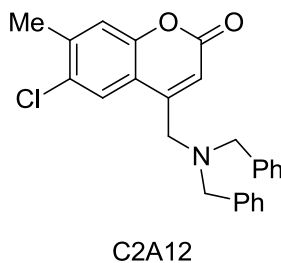

**6-Chloro-4-((dibenzylamino)methyl)-7-methyl-2H-chromen-2-one:**  $^1\text{H}$  NMR (500 MHz,  $\text{CDCl}_3$ )  $\delta$  7.71 (s, 1H), 7.34–7.24 (m, 10H), 7.11 (s, 1H), 6.61 (s, 1H), 3.61–3.60 (s, 6H), 2.40 (s, 3H) ppm;  $^{13}\text{C}$  NMR (125 MHz,  $\text{CDCl}_3$ )  $\delta$  159.63, 151.34, 151.07, 139.51, 137.19, 128.92, 128.05, 127.65, 126.57, 124.10, 117.77, 116.87, 114.24, 58.01, 53.88, 19.56 ppm; IR ( $\text{CH}_2\text{Cl}_2$ ):  $\nu$  1731, 1617, 1548  $\text{cm}^{-1}$ ; HRMS: Calcd for  $\text{C}_{25}\text{H}_{23}\text{ClNO}_2$  (M + H) 404.1373; found: 404.1428.

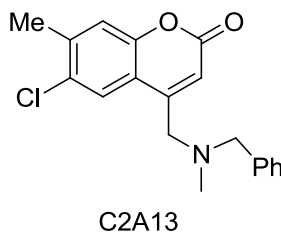

**4-((Benzyl(methyl)amino)methyl)-6-chloro-7-methyl-2H-chromen-2-one:**  $^1\text{H}$  NMR (500 MHz,  $\text{CDCl}_3$ )  $\delta$  7.75 (s, 1H), 7.34–7.26 (m, 5H), 7.15 (s, 1H), 6.52 (s, 1H), 3.62 (s, 2H), 3.54 (s, 2H), 2.41 (s, 3H), 2.26 (s, 3H) ppm;  $^{13}\text{C}$  NMR (125 MHz,  $\text{CDCl}_3$ )  $\delta$  158.77, 150.21, 150.08, 138.53, 136.26, 128.03, 127.15, 126.69, 125.65, 123.15, 116.85, 115.98, 113.22, 60.92, 55.97, 40.91, 18.64 ppm; IR ( $\text{CH}_2\text{Cl}_2$ ):  $\nu$  1728, 1616  $\text{cm}^{-1}$ ; HRMS: Calcd for  $\text{C}_{19}\text{H}_{19}\text{ClNO}_2$  ( $\text{M} + \text{H}$ ) 328.1060; found: 328.1118.

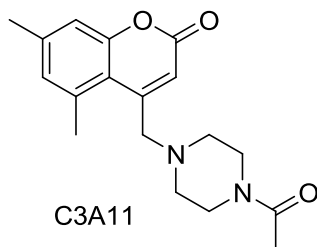

**4-((4-Acetylpiperazin-1-yl)methyl)-5,7-dimethyl-2H-chromen-2-one:**  $^1\text{H}$  NMR (500 MHz,  $\text{CDCl}_3$ )  $\delta$  7.01 (s, 1H), 6.91 (s, 1H), 6.51 (s, 1H), 3.71 (s, 2H), 3.65 (t,  $J = 5$  Hz, 2H), 3.49 (t,  $J = 5$  Hz, 2H), 2.74 (s, 3H), 2.53 (q,  $J = 5$  Hz, 4H), 2.38 (s, 3H), 2.10 (s, 3H) ppm;  $^{13}\text{C}$  NMR (125 MHz,  $\text{CDCl}_3$ )  $\delta$  168.99, 160.77, 155.53, 152.76, 142.01, 136.38, 129.80, 116.08, 115.79, 115.62, 61.94, 53.07, 52.99, 46.15, 41.32, 23.52, 21.33, 21.15 ppm; IR ( $\text{CH}_2\text{Cl}_2$ ):  $\nu$  1728, 1638, 1617  $\text{cm}^{-1}$ ; HRMS: Calcd for  $\text{C}_{18}\text{H}_{23}\text{N}_2\text{O}_3$  ( $\text{M} + \text{H}$ ) 315.1664; found: 315.1728

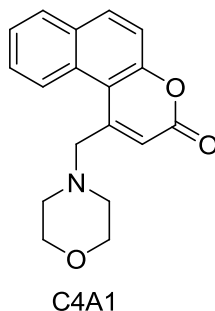

**1-(Morpholinomethyl)-3H-benzo[*f*]chromen-3-one:**  $^1\text{H}$  NMR (500 MHz,  $\text{CDCl}_3$ )  $\delta$  8.65 (d,  $J = 10$  Hz, 1H), 7.95 (d,  $J = 5$  Hz, 1H), 7.90 (d,  $J = 10$  Hz, 1H), 7.66–7.62 (m, 1H), 7.57–7.54 (m, 1H), 7.44 (d,  $J = 10$  Hz, 2H), 6.82 (s, 1H), 3.96 (s, 2H), 3.78–3.76 (m, 4H), 2.66–2.65 (m, 4H) ppm;  $^{13}\text{C}$  NMR (125 MHz,  $\text{CDCl}_3$ ) 160.64, 154.93, 152.98, 133.73, 131.28, 129.59, 129.48, 127.77, 126.25, 125.59, 117.73, 116.24, 114.28, 66.89, 63.13, 53.59 ppm; IR ( $\text{CH}_2\text{Cl}_2$ ):  $\nu$  1724, 1618, 1617  $\text{cm}^{-1}$ ; HRMS: Calcd for  $\text{C}_{18}\text{H}_{18}\text{NO}_3$  ( $\text{M} + \text{H}$ ) 296.1242; found 296.1292.

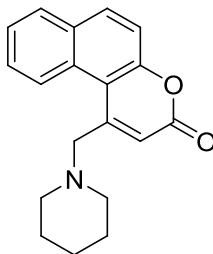

C4A2

**1-(Piperidin-1-ylmethyl)-3H-benzo[f]chromen-3-one:**  $^1\text{H}$  NMR (500 MHz,  $\text{CDCl}_3$ )  $\delta$  8.62 (d,  $J = 10$  Hz, 1H), 7.93 (d,  $J = 10$  Hz, 1H), 7.89–7.87 (m, 1H), 7.64–7.61 (m, 1H), 7.55–7.52 (m, 1H), 7.44 (d,  $J = 10$  Hz, 1H), 6.82 (s, 1H), 3.88 (s, 2H), 2.56 (bs, 4H), 1.65–1.61 (m, 4H), 1.50–1.47 (m, 2H) ppm;  $^{13}\text{C}$  NMR (125 MHz,  $\text{CDCl}_3$ )  $\delta$  160.08, 154.01, 153.38, 132.65, 130.42, 128.92, 128.49, 126.81, 125.79, 124.64, 116.89, 115.28, 113.74, 62.84, 53.84, 25.19, 23.36 ppm; IR ( $\text{CH}_2\text{Cl}_2$ ):  $\nu$  1726, 1624, 1550  $\text{cm}^{-1}$ ; HRMS: Calcd for  $\text{C}_{19}\text{H}_{20}\text{NO}_2$  ( $\text{M} + \text{H}$ ) 294.1449; found: 294.1492.

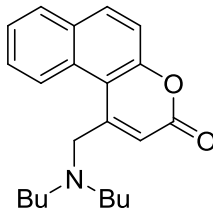

C4A3

**1-((Dibutylamino)methyl)-3H-benzo[f]chromen-3-one:**  $^1\text{H}$  NMR (500 MHz,  $\text{CDCl}_3$ )  $\delta$  8.54 (d,  $J = 10$  Hz, 1H), 7.94 (d,  $J = 5$  Hz, 1H), 7.91–7.89 (m, 1H), 7.65–7.63 (m, 1H), 7.56–7.53 (m, 1H), 7.46 (d,  $J = 5$  Hz, 1H), 7.09 (s, 1H), 4.09 (s, 2H), 2.56 (t,  $J = 5$  Hz, 4H), 1.53–1.47 (m, 4H), 1.37–1.29 (m, 4H), 0.90 (t,  $J = 5$  Hz, 6H) ppm;  $^{13}\text{C}$  NMR (125 MHz,  $\text{CDCl}_3$ )  $\delta$  160.18, 155.60, 153.64, 132.34, 130.28, 128.73, 128.46, 126.59, 125.38, 124.40, 116.81, 114.28, 113.51, 59.10, 53.20, 28.36, 19.63, 13.08 ppm; IR ( $\text{CH}_2\text{Cl}_2$ ):  $\nu$  1722, 1623, 1549  $\text{cm}^{-1}$ ; HRMS: Calcd for  $\text{C}_{22}\text{H}_{28}\text{NO}_2$  ( $\text{M} + \text{H}$ ) 338.2075; found: 338.2119.

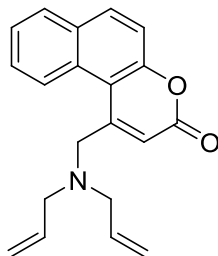

C4A4

**1-((Diallylamino)methyl)-3H-benzo[f]chromen-3-one:**  $^1\text{H}$  NMR (500 MHz,  $\text{CDCl}_3$ )  $\delta$  8.44 (d,  $J = 10$  Hz, 1H), 7.95 (d,  $J = 10$  Hz, 1H), 7.91–7.89 (m, 1H), 7.63–7.61 (m, 1H), 7.56–7.53 (m, 1H), 7.47 (d,  $J = 10$  Hz, 1H), 7.08 (t,  $J = 1$  Hz, 1H), 5.96–5.88 (m, 2H), 5.28–5.18 (m, 4H), 4.14 (d,  $J = 1$  Hz, 2H), 3.23 (d,  $J = 5$  Hz, 4H) ppm;  $^{13}\text{C}$  NMR (125 MHz,  $\text{CDCl}_3$ )  $\delta$  161.06, 155.78, 154.73, 134.88, 133.49, 131.31, 129.65, 129.53, 127.65, 126.19, 125.45, 118.24, 117.83, 115.18, 114.37, 58.22, 56.96 ppm; IR ( $\text{CH}_2\text{Cl}_2$ ):  $\nu$  1727, 1551  $\text{cm}^{-1}$ ; HRMS: Calcd for  $\text{C}_{20}\text{H}_{20}\text{NO}_2$  ( $\text{M} + \text{H}$ ) 306.1449; found: 306.1501.

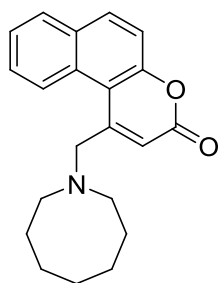

C4A14

**1-(Azocan-1-ylmethyl)-3H-benzo[f]chromen-3-one:**  $^1\text{H}$  NMR (500 MHz,  $\text{CDCl}_3$ )  $\delta$  8.73 (d,  $J = 10$  Hz, 1H), 7.96 (d,  $J = 10$  Hz, 1H), 7.90–7.88 (m, 1H), 7.66–7.63 (m, 1H), 7.56–7.53 (m, 1H), 7.46 (d,  $J = 10$  Hz, 1H), 6.73 (s, 1H), 4.03 (d,  $J = 1$  Hz, 2H), 2.74 (t,  $J = 5$  Hz, 4H), 1.55–1.52 (m, 10H) ppm;  $^{13}\text{C}$  NMR (125 MHz,  $\text{CDCl}_3$ )  $\delta$  160.86, 155.26, 154.83, 133.56, 131.21, 129.76, 129.21, 127.59, 127.15, 125.53, 117.76, 116.98, 114.69, 64.11, 54.32, 27.94, 27.20, 25.83 ppm; IR ( $\text{CH}_2\text{Cl}_2$ ):  $\nu$  1720, 1623, 1549  $\text{cm}^{-1}$ ; HRMS: Calcd for  $\text{C}_{21}\text{H}_{24}\text{NO}_2$  ( $\text{M} + \text{H}$ ) 322.1762; found: 322.1790.

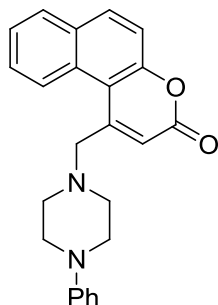

C4A16

**1-((4-Phenylpiperazin-1-yl)methyl)-3H-benzof[*h*]chromen-3-one:**  $^1\text{H}$  NMR (500 MHz,  $\text{CDCl}_3$ )  $\delta$  8.61 (d,  $J = 10$  Hz, 1H), 7.97 (d,  $J = 10$  Hz, 1H), 7.91–7.89 (m, 1H), 7.66–7.63 (m, 1H), 7.57–7.54 (m, 1H), 7.47 (d,  $J = 10$  Hz, 1H), 7.28–7.25 (m, 2H), 6.94–6.93 (m, 2H), 6.88–6.85 (m, 2H), 4.02 (s, 2H), 3.25 (t,  $J = 5$  Hz, 4H), 2.82 (t,  $J = 5$  Hz, 4H) ppm;  $^{13}\text{C}$  NMR (125 MHz,  $\text{CDCl}_3$ )  $\delta$  160.74, 154.99, 153.30, 151.13, 133.75, 131.32, 129.67, 129.48, 129.18, 127.78, 126.39, 125.61, 119.98, 117.79, 116.36, 116.21, 114.40, 62.83, 53.23, 49.22 ppm; IR ( $\text{CH}_2\text{Cl}_2$ ):  $\nu$  1720, 1622, 1598  $\text{cm}^{-1}$ ; HRMS: Calcd for  $\text{C}_{24}\text{H}_{23}\text{N}_2\text{O}_2$  ( $\text{M} + \text{H}$ ) 371.1715; found: 371.1732.

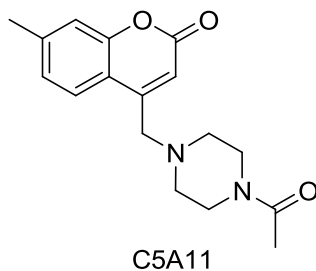

**4-((4-Acetylpiperazin-1-yl)methyl)-7-methyl-2H-chromen-2-one:**  $^1\text{H}$  NMR (500 MHz,  $\text{CDCl}_3$ )  $\delta$  7.68 (d,  $J = 10$  Hz, 1H), 7.14–7.10 (m, 2H), 6.48 (s, 1H), 3.67–3.65 (m, 4H), 3.51 (t,  $J = 5$  Hz, 2H), 2.54 (q,  $J = 5$  Hz, 4H), 2.45 (s, 3H), 2.11 (s, 3H) ppm;  $^{13}\text{C}$  NMR (125 MHz,  $\text{CDCl}_3$ )  $\delta$  168.97, 161.15, 153.87, 151.47, 143.06, 125.37, 124.31, 117.22, 116.21, 113.78, 58.65, 53.35, 53.17, 46.20, 41.36, 21.63, 21.35 ppm; IR ( $\text{CH}_2\text{Cl}_2$ ):  $\nu$  1717, 1618, 1557  $\text{cm}^{-1}$ ; HRMS: Calcd for  $\text{C}_{17}\text{H}_{21}\text{N}_2\text{O}_3$  ( $\text{M} + \text{H}$ ) 301.1507; found: 301.1545.

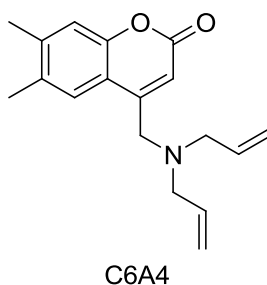

**4-((Diallylamino)methyl)-6,7-dimethyl-2H-chromen-2-one:**  $^1\text{H}$  NMR (500 MHz,  $\text{CDCl}_3$ )  $\delta$  7.47 (s, 1H), 7.09 (s, 1H), 6.56 (s,  $J = 1$  Hz, 1H), 5.89–5.84 (m, 2H), 5.25–5.17 (m, 4H), 3.69 (d,  $J = 1$  Hz, 2H), 3.16 (d,  $J = 5$  Hz, 4H), 2.33 (s, 3H), 2.31 (s, 3H) ppm;  $^{13}\text{C}$  NMR (125 MHz,  $\text{CDCl}_3$ )  $\delta$  160.48, 152.26, 150.85, 140.27, 133.76, 131.41, 123.23, 116.94, 116.26, 115.27, 112.07, 56.0, 52.30, 18.95, 18.25 ppm; IR ( $\text{CH}_2\text{Cl}_2$ ):  $\nu$  1713, 1623, 1557  $\text{cm}^{-1}$ ; HRMS: Calcd for  $\text{C}_{18}\text{H}_{22}\text{NO}_2$  ( $\text{M} + \text{H}$ ) 284.1606; found: 284.1645.



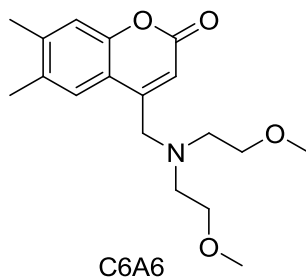

**4-((bis(2-Methoxyethyl)amino)methyl)-6,7-dimethyl-2H-chromen-2-one:**  $^1\text{H}$  NMR (500 MHz,  $\text{CDCl}_3$ )  $\delta$  7.54 (s, 1H), 7.10 (s, 1H), 6.60 (s, 1H), 3.91 (d,  $J = 1$  Hz, 2H), 3.51 (t,  $J = 5$  Hz, 4H), 3.32 (s, 6H), 2.84 (t,  $J = 5$  Hz, 4H), 2.33 (s, 3H), 2.31 (s, 3H) ppm;  $^{13}\text{C}$  NMR (125 MHz,  $\text{CDCl}_3$ )  $\delta$  161.83, 153.97, 152.07, 141.40, 132.60, 124.58, 117.43, 116.51, 113.18, 71.44, 58.81, 56.15, 54.63, 20.17, 19.43 ppm; IR ( $\text{CH}_2\text{Cl}_2$ ):  $\nu$  1717, 1623, 1557  $\text{cm}^{-1}$ ; HRMS: Calcd for  $\text{C}_{18}\text{H}_{26}\text{NO}_4$  ( $\text{M} + \text{H}$ ) 320.1817; found: 320.1857.

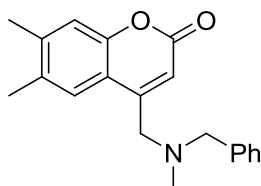

**4-((Benzyl(methyl)amino)methyl)-6,7-dimethyl-2H-chromen-2-one:**  $^1\text{H}$  NMR (500 MHz,  $\text{CDCl}_3$ )  $\delta$  7.37–7.28 (m, 6H), 7.07 (s, 1H), 6.51 (s, 1H), 3.64 (s, 2H), 3.58 (s, 2H), 2.31 (s, 3H), 2.28 (s, 3H), 2.26 (s, 3H) ppm;  $^{13}\text{C}$  NMR (125 MHz,  $\text{CDCl}_3$ )  $\delta$  160.41, 151.63, 150.97, 140.39, 137.22, 131.45, 127.83, 127.26, 126.22, 123.74, 116.22, 115.29, 112.72, 61.65, 56.43, 41.70, 18.97, 18.15 ppm; IR ( $\text{CH}_2\text{Cl}_2$ ):  $\nu$  1714, 1623, 1557  $\text{cm}^{-1}$ ; HRMS: Calcd for  $\text{C}_{20}\text{H}_{22}\text{NO}_2$  ( $\text{M} + \text{H}$ ) 308.1606; found: 308.1641.

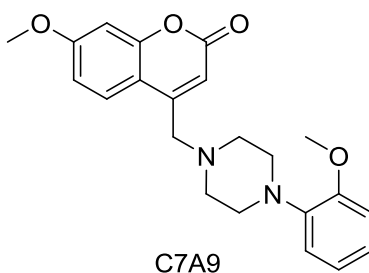

**7-Methoxy-4-((4-(2-methoxyphenyl)piperazin-1-yl)methyl)-2H-chromen-2-one:**  $^1\text{H}$  NMR (500 MHz,  $\text{CDCl}_3$ )  $\delta$  7.79 (d,  $J = 10$  Hz, 1H), 7.02–6.82 (m, 6H), 6.41 (s, 1H), 3.87 (s, 3H), 3.86 (s, 3H), 3.66 (s, 2H), 3.11 (bs, 4H), 2.74 (bs, 4H) ppm;  $^{13}\text{C}$  NMR (125 MHz,  $\text{CDCl}_3$ )  $\delta$  162.55, 161.51, 155.65, 152.24, 141.10, 125.97, 123.07, 121.00, 118.24, 112.48, 112.23, 111.82, 111.17, 100.80, 59.22, 55.75, 55.38, 53.74, 50.65 ppm; IR ( $\text{CH}_2\text{Cl}_2$ ):  $\nu$  1717, 1610, 1557  $\text{cm}^{-1}$ ; HRMS: Calcd for  $\text{C}_{22}\text{H}_{25}\text{N}_2\text{O}_4$  ( $\text{M} + \text{H}$ ) 381.1770; found: 381.1804.

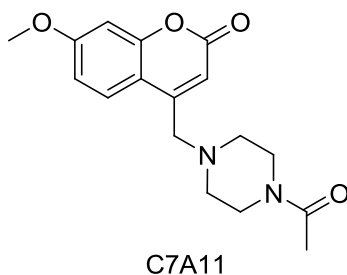

**4-((4-Acetylpiperazin-1-yl)methyl)-7-methoxy-2H-chromen-2-one:**  $^1\text{H}$  NMR (500 MHz,  $\text{CDCl}_3$ )  $\delta$  7.73 (d,  $J = 10$  Hz, 1H), 6.87–6.82 (m, 2H), 6.37 (s, 1H), 3.88 (s, 3H), 3.67–3.63 (m, 4H), 3.50 (t,  $J = 5$  Hz, 2H), 2.55–2.52 (m, 4H), 2.11 (s, 3H) ppm;  $^{13}\text{C}$  NMR (125 MHz,  $\text{CDCl}_3$ )  $\delta$  168.96, 162.64, 161.29, 155.63, 151.59, 125.75, 112.28, 112.18, 111.77, 100.84, 58.88, 55.76, 53.31, 53.14, 46.19, 41.35, 21.34 ppm; IR ( $\text{CH}_2\text{Cl}_2$ ):  $\nu$  1713, 1608, 1557  $\text{cm}^{-1}$ ; HRMS: Calcd for  $\text{C}_{17}\text{H}_{21}\text{N}_2\text{O}_4$  (M + H) 317.1457; found: 317.1496.

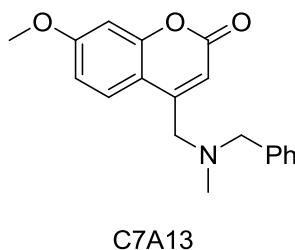

**4-((Benzyl(methyl)amino)methyl)-7-methoxy-2H-chromen-2-one:**  $^1\text{H}$  NMR (500 MHz,  $\text{CDCl}_3$ )  $\delta$  7.67 (d,  $J = 10$  Hz, 1H), 7.33–7.25 (m, 5H), 6.82–6.79 (m, 2H), 6.42 (t,  $J = 1$  Hz, 1H), 3.85 (s, 3H), 3.61 (s, 2H), 3.58 (d,  $J = 1$  Hz, 2H), 2.26 (s, 3H) ppm;  $^{13}\text{C}$  NMR (125 MHz,  $\text{CDCl}_3$ )  $\delta$  162.52, 161.55, 155.61, 153.10, 138.36, 128.94, 128.42, 127.39, 126.05, 112.44, 112.12, 111.86, 100.76, 62.57, 58.15, 55.72, 42.75 ppm; IR ( $\text{CH}_2\text{Cl}_2$ ):  $\nu$  1716, 1611  $\text{cm}^{-1}$ ; HRMS: Calcd for  $\text{C}_{19}\text{H}_{20}\text{NO}_3$  (M + H) 310.1398; found: 310.1438.

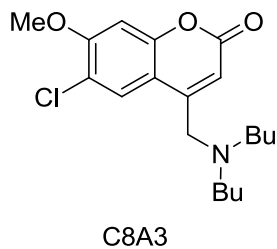

**6-Chloro-4-((dibutylamino)methyl)-7-methoxy-2H-chromen-2-one:**  $^1\text{H}$  NMR (500 MHz,  $\text{CDCl}_3$ )  $\delta$  7.90 (s, 1H), 6.85 (s, 1H), 6.47 (s, 1H), 3.96 (s, 3H), 3.62 (d,  $J = 5$  Hz, 1H), 2.47 (t,  $J = 5$  Hz, 4H), 1.45–1.43 (m, 4H), 1.34–1.28 (m, 4H), .089 (t,  $J = 5$  Hz, 6H) ppm;  $^{13}\text{C}$  NMR (125 MHz,  $\text{CDCl}_3$ )  $\delta$  161.09, 157.34, 153.86, 153.62, 125.77, 118.59, 112.78, 112.40, 101.21, 56.56, 55.98, 54.23, 29.14, 20.56, 14.02 ppm; IR ( $\text{CH}_2\text{Cl}_2$ ):  $\nu$  1729, 1607, 1557  $\text{cm}^{-1}$ ; HRMS: Calcd for  $\text{C}_{19}\text{H}_{27}\text{ClNO}_3$  (M + H) 352.1635; found: 352.1673.

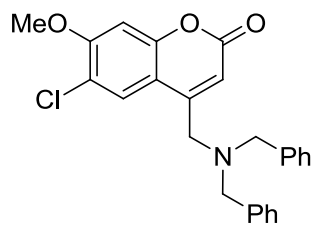

C8A12

**6-Chloro-4-((dibenzylamino)methyl)-7-methoxy-2H-chromen-2-one:**  $^1\text{H}$  NMR (500 MHz,  $\text{CDCl}_3$ )  $\delta$  7.79 (s, 1H), 7.34–7.25 (m, 10H), 6.80 (s, 1H), 6.51 (s, 1H), 3.93 (s, 3H), 3.61–3.60 (m, 6H) ppm;  $^{13}\text{C}$  NMR (125 MHz,  $\text{CDCl}_3$ )  $\delta$  160.77, 157.50, 153.94, 152.56, 138.12, 129.01, 128.59, 127.52, 126.21, 118.69, 113.13, 112.57, 101.19, 58.94, 56.60, 55.08 ppm; IR ( $\text{CH}_2\text{Cl}_2$ ):  $\nu$  1728, 1607, 1553  $\text{cm}^{-1}$ ; HRMS: Calcd for  $\text{C}_{25}\text{H}_{23}\text{ClNO}_3$  (M + H); 420.1322 found: 420.1357.

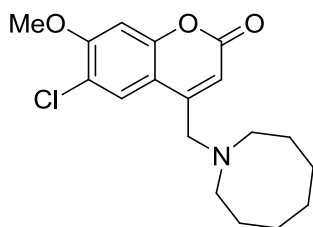

C8A14

**4-(Azocan-1-ylmethyl)-6-chloro-7-methoxy-2H-chromen-2-one:**  $^1\text{H}$  NMR (500 MHz,  $\text{CDCl}_3$ )  $\delta$  8.01 (s, 1H), 6.85 (s, 1H), 6.33 (s, 1H), 3.97 (s, 3H), 3.66 (d,  $J = 0.8$  Hz, 2H), 2.63 (bs, 4H), 1.61–1.55 (m, 10H) ppm;  $^{13}\text{C}$  NMR (125 MHz,  $\text{CDCl}_3$ )  $\delta$  161.01, 157.41, 153.97, 153.09, 126.77, 118.61, 112.97, 112.85, 100.15, 60.86, 56.58, 55.01, 27.76, 27.38, 25.75 ppm; IR ( $\text{CH}_2\text{Cl}_2$ ):  $\nu$  1729, 1607, 1555  $\text{cm}^{-1}$ ; HRMS: Calcd for  $\text{C}_{18}\text{H}_{23}\text{ClNO}_3$  (M + H); 336.1322 found: 336.1359.

# C1A5

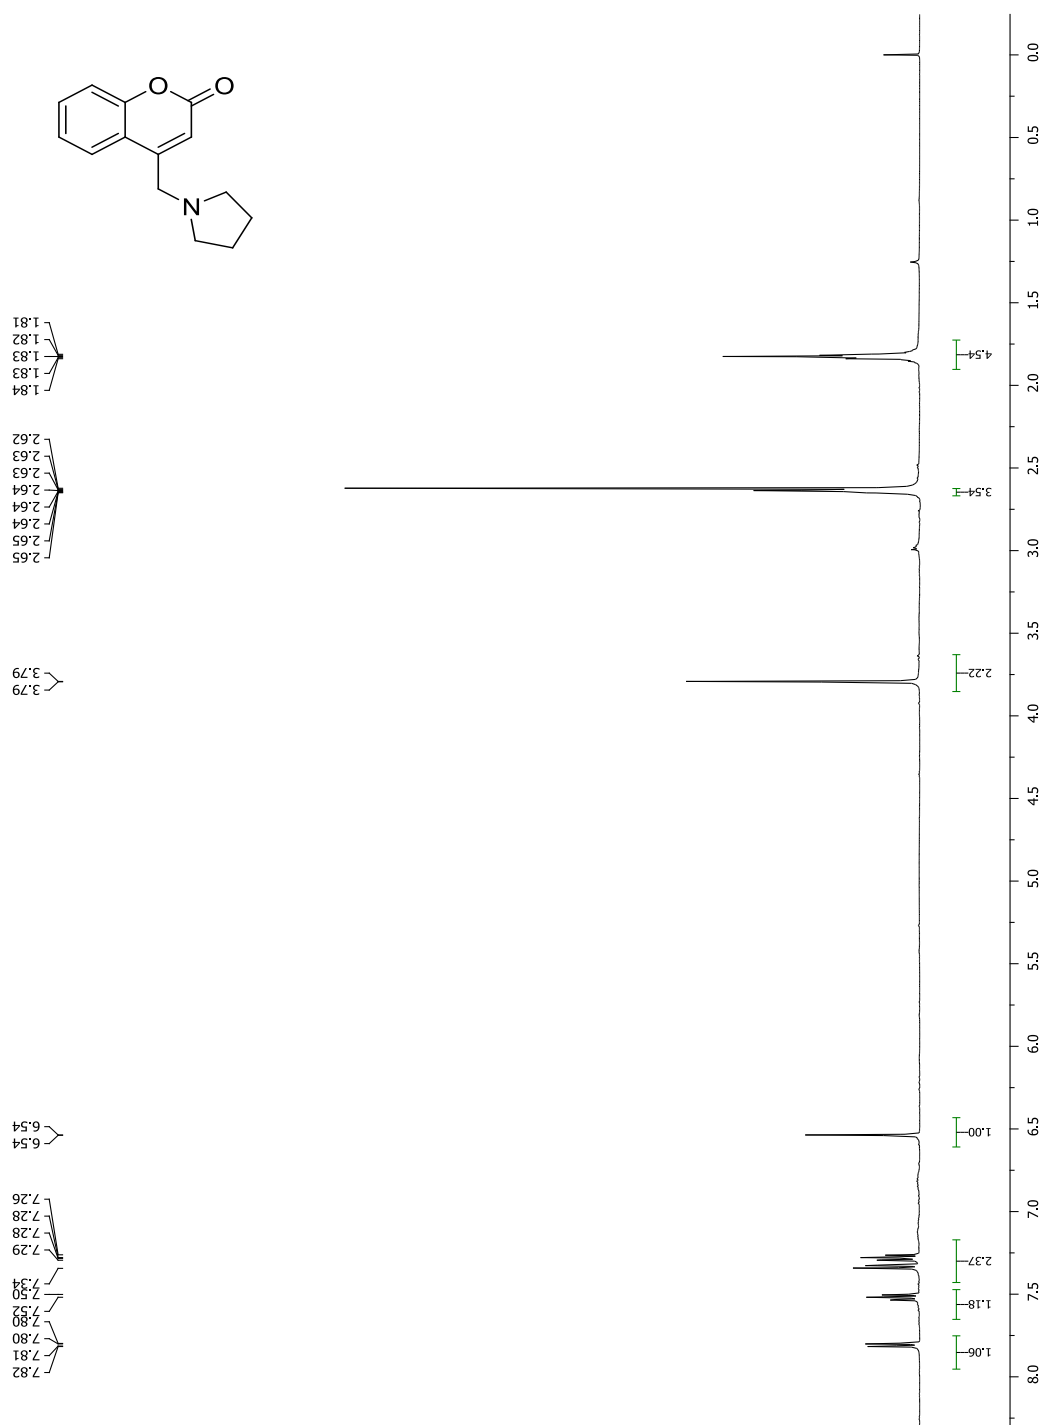

# C1A5

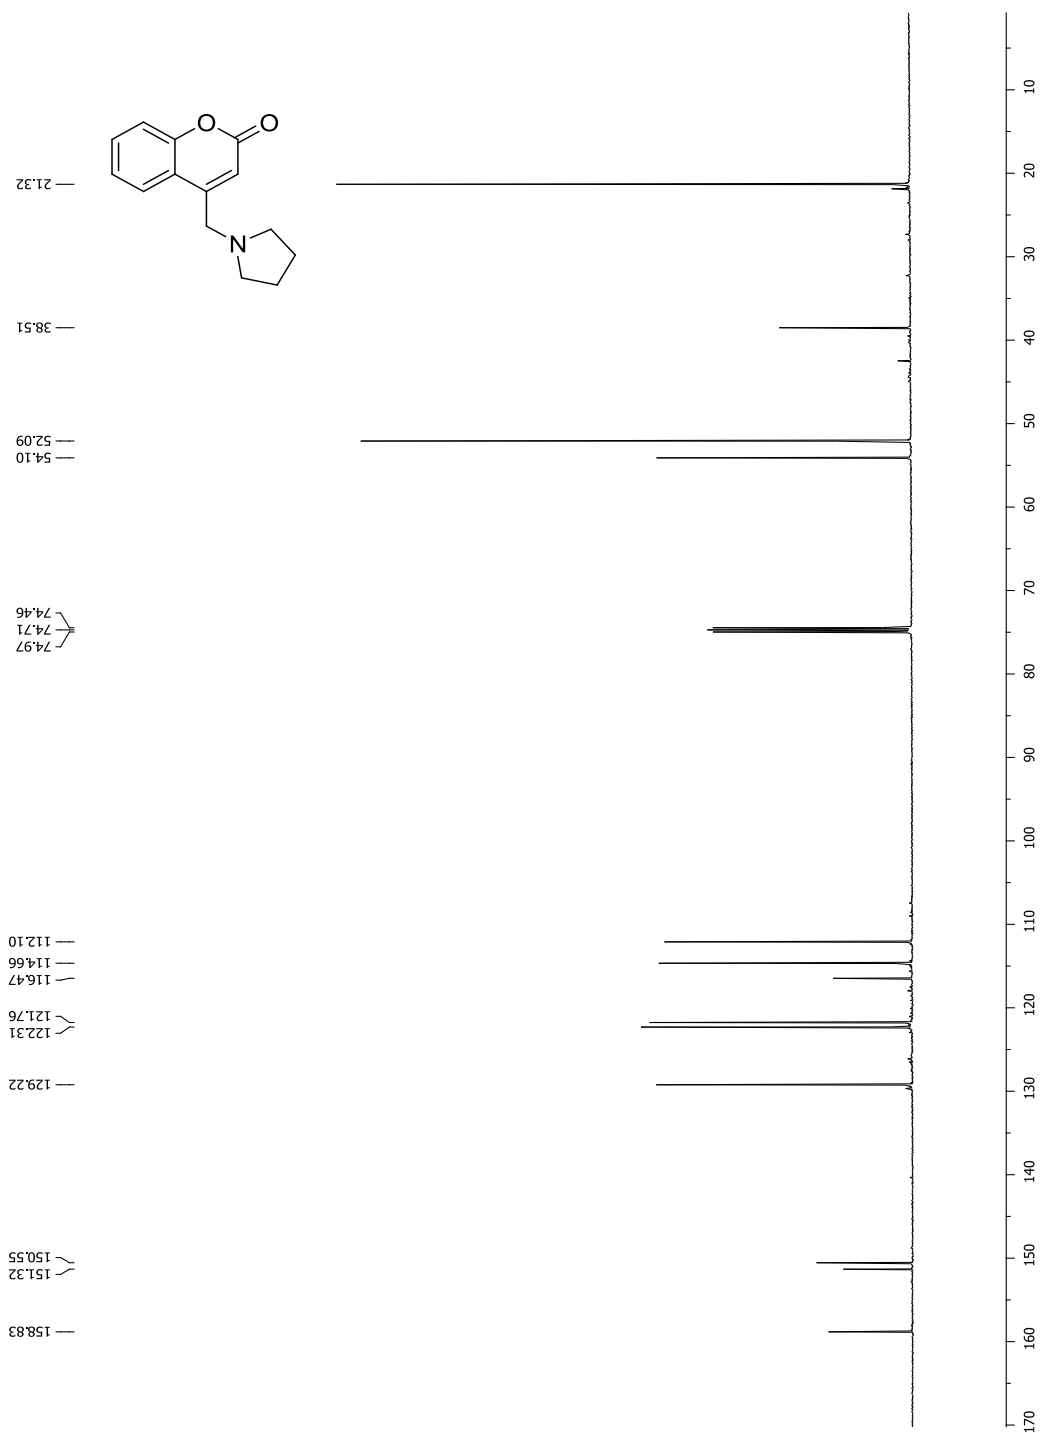

C1A7

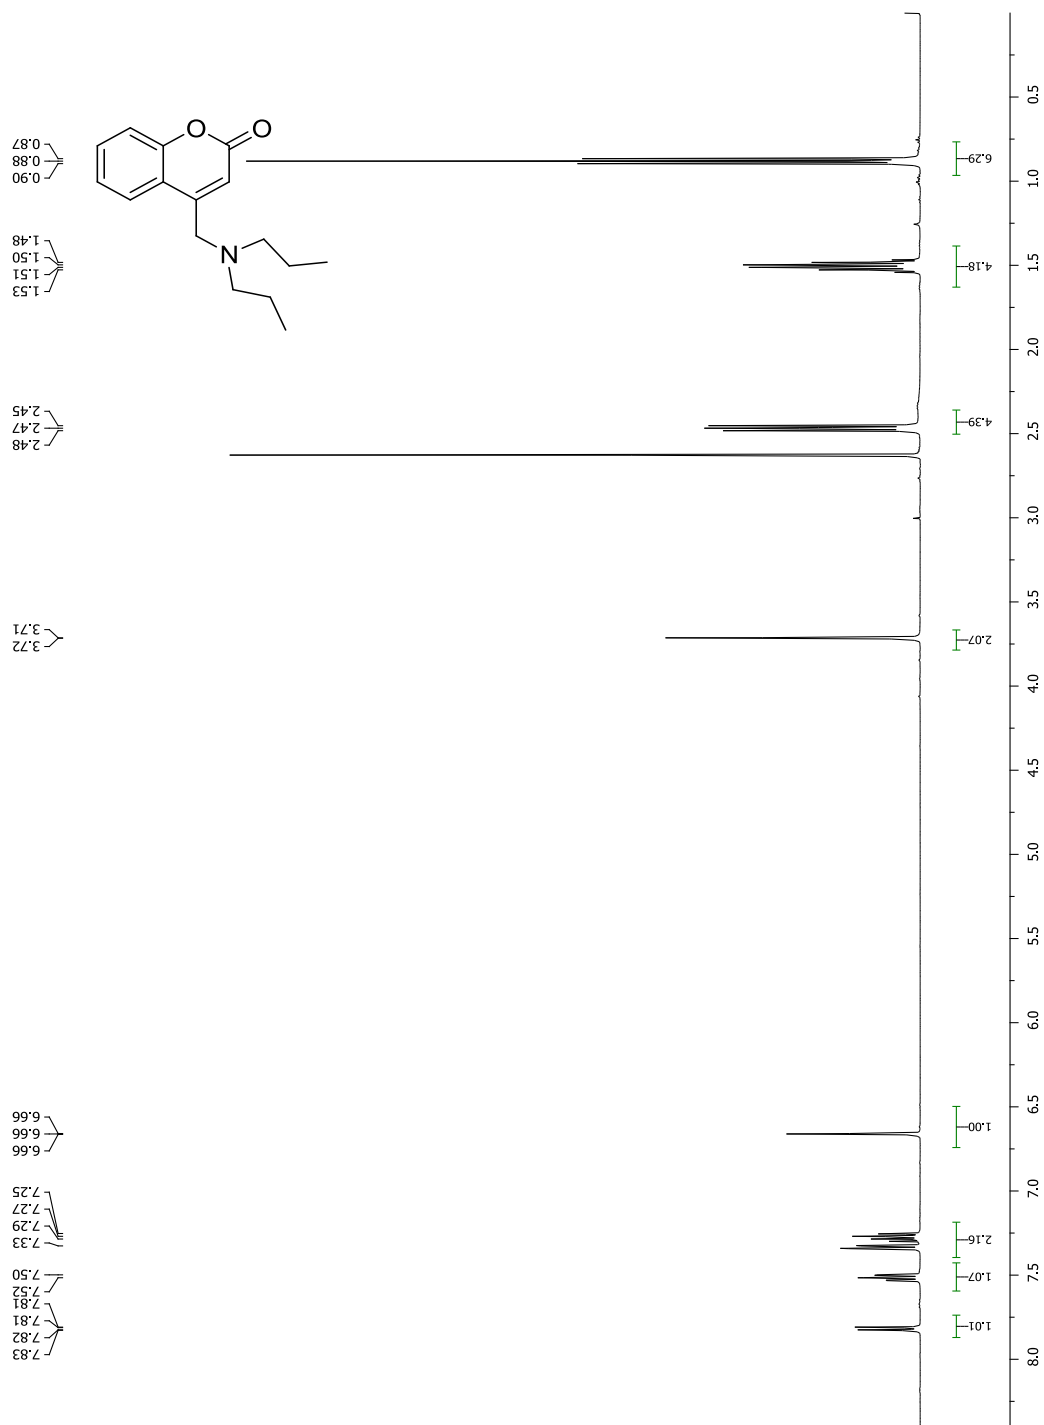

# C1A7

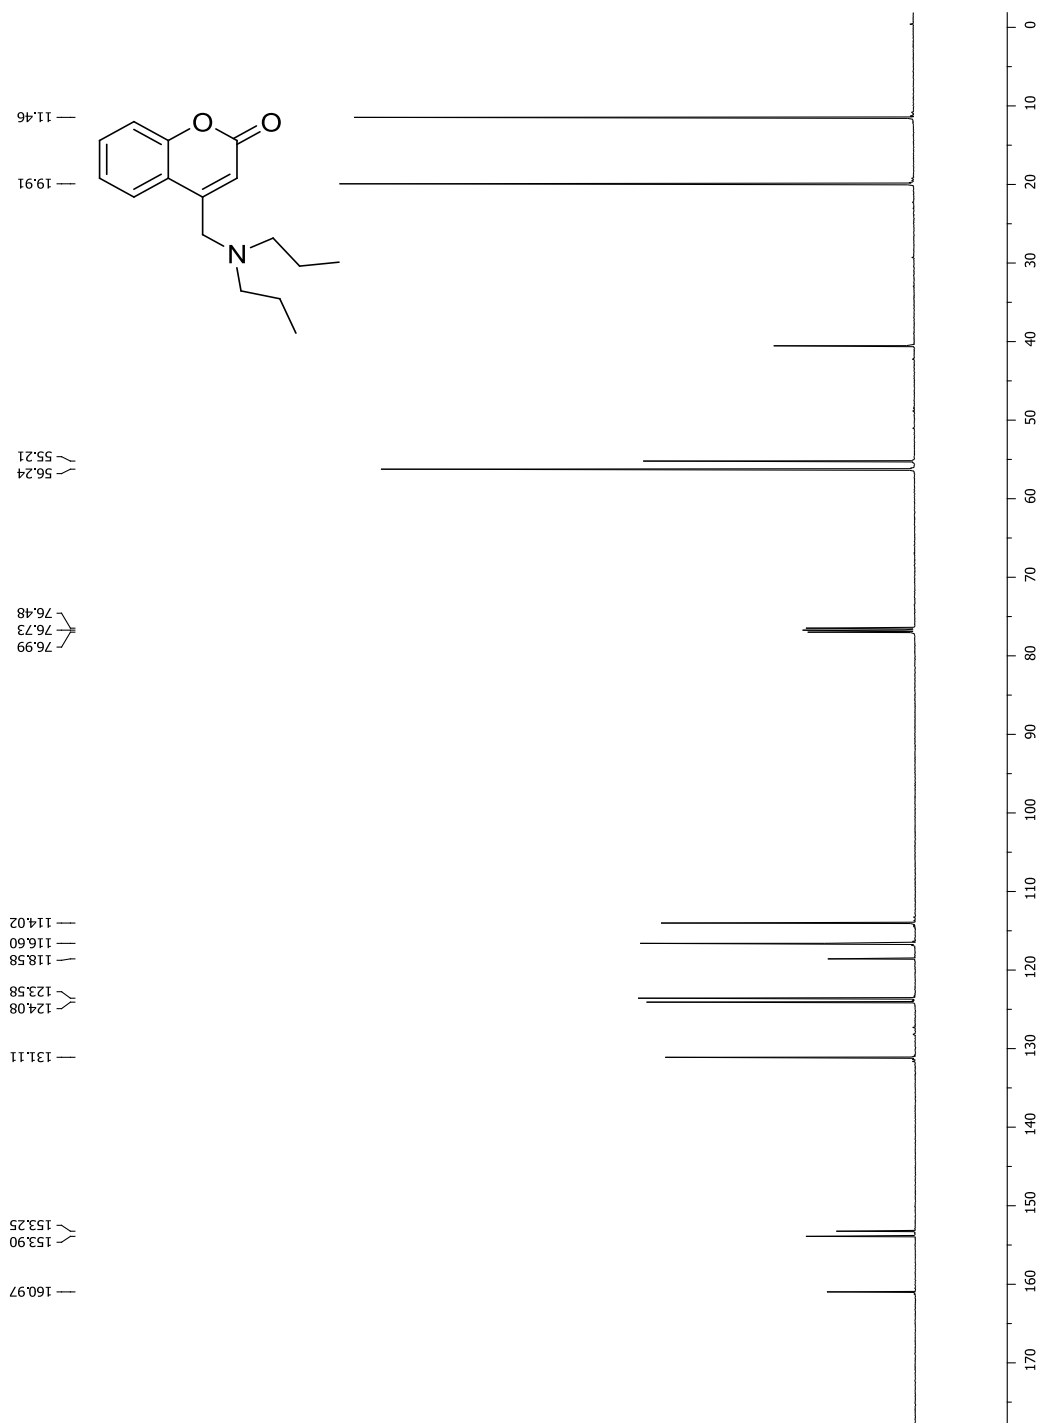

C1A8

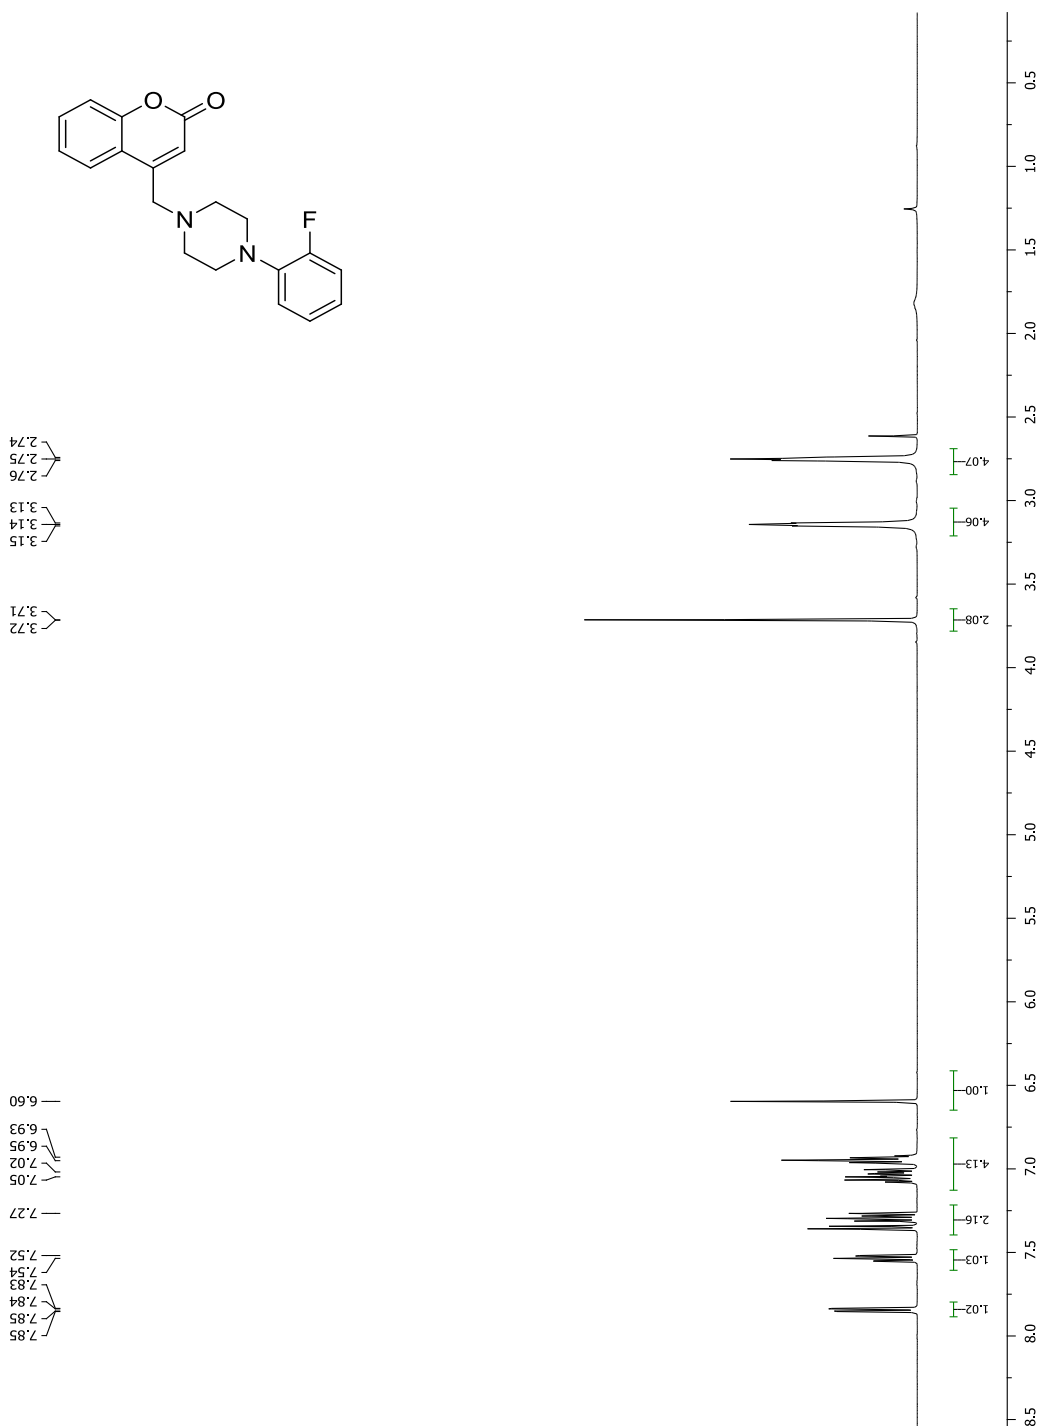



# C1A8

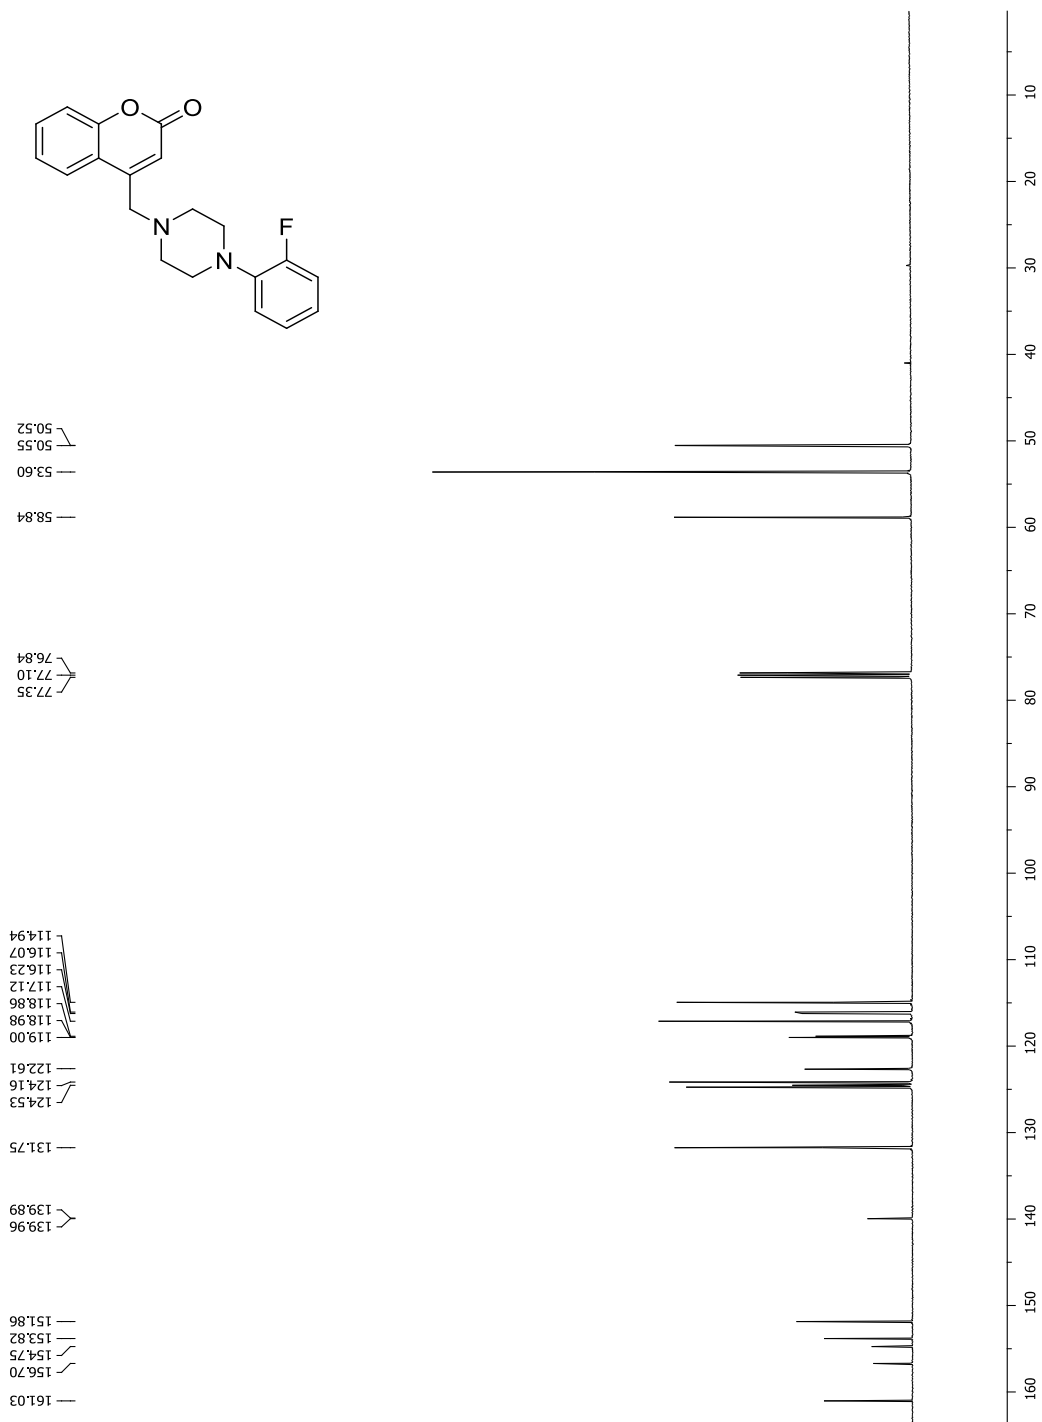

# C1A14

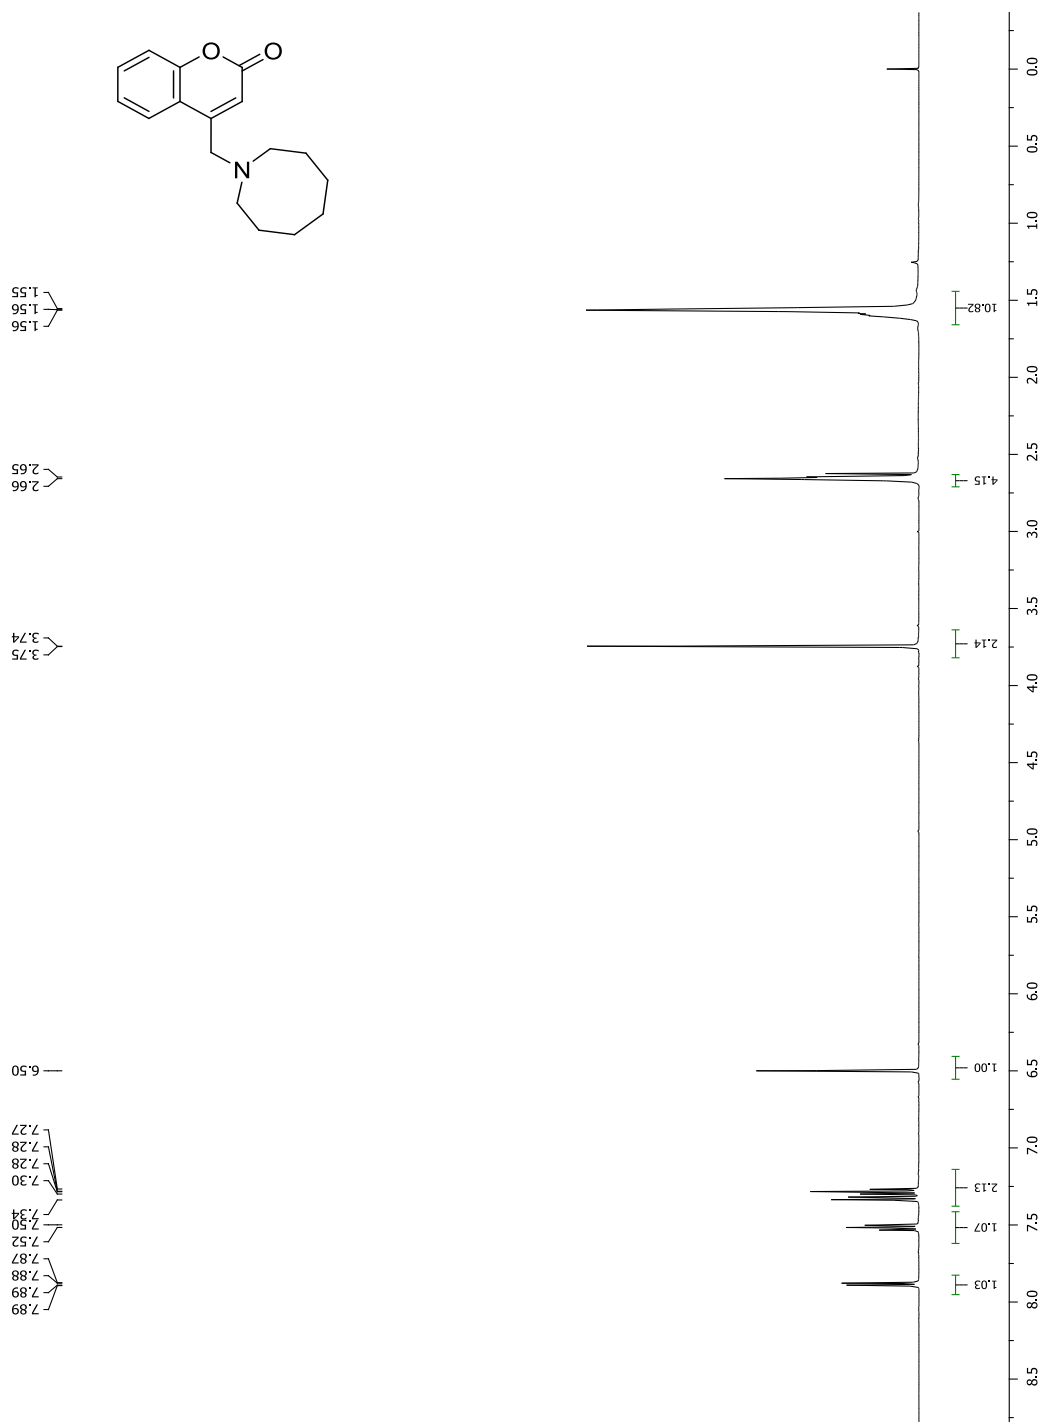

C1A14

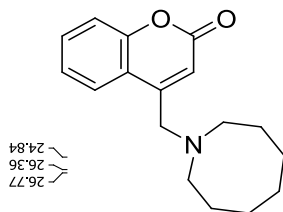

26.77  
26.36  
24.84

53.95

59.33

76.33  
76.08  
75.82

113.98

118.04

115.94

122.91

124.31

130.55

152.76  
152.74

160.19

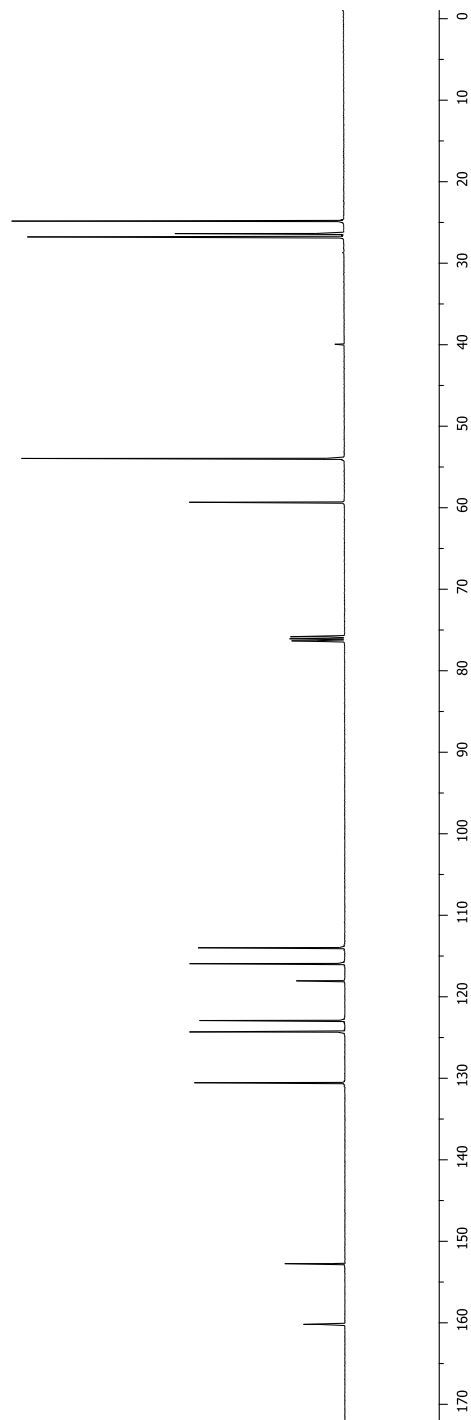

# C2A6

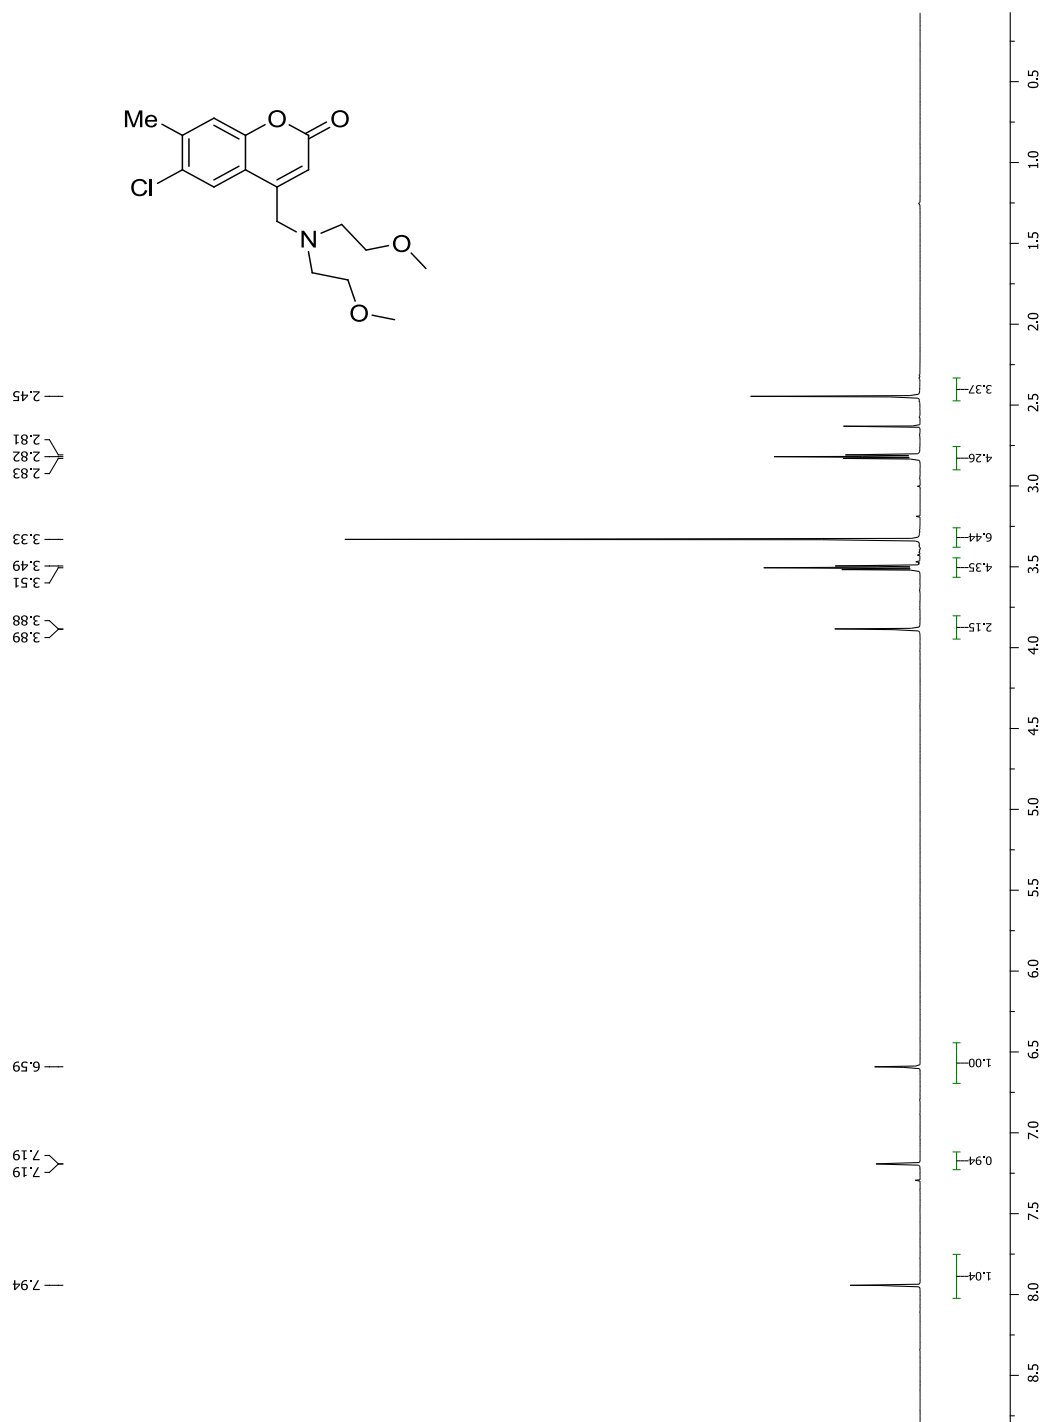

# C2A6

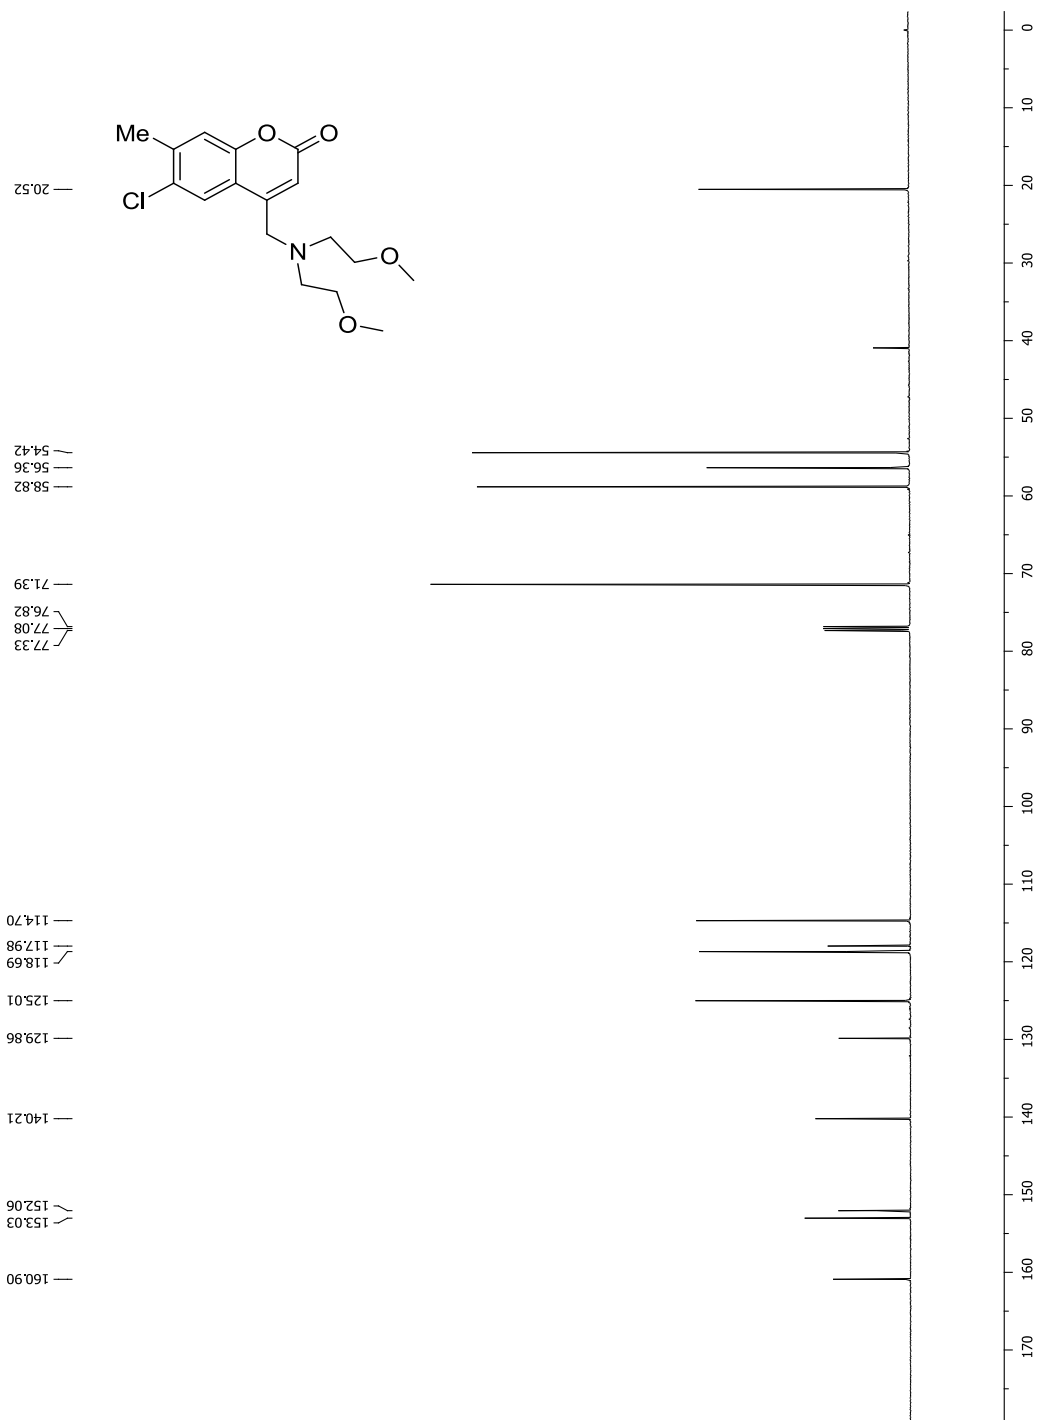

# C2A10

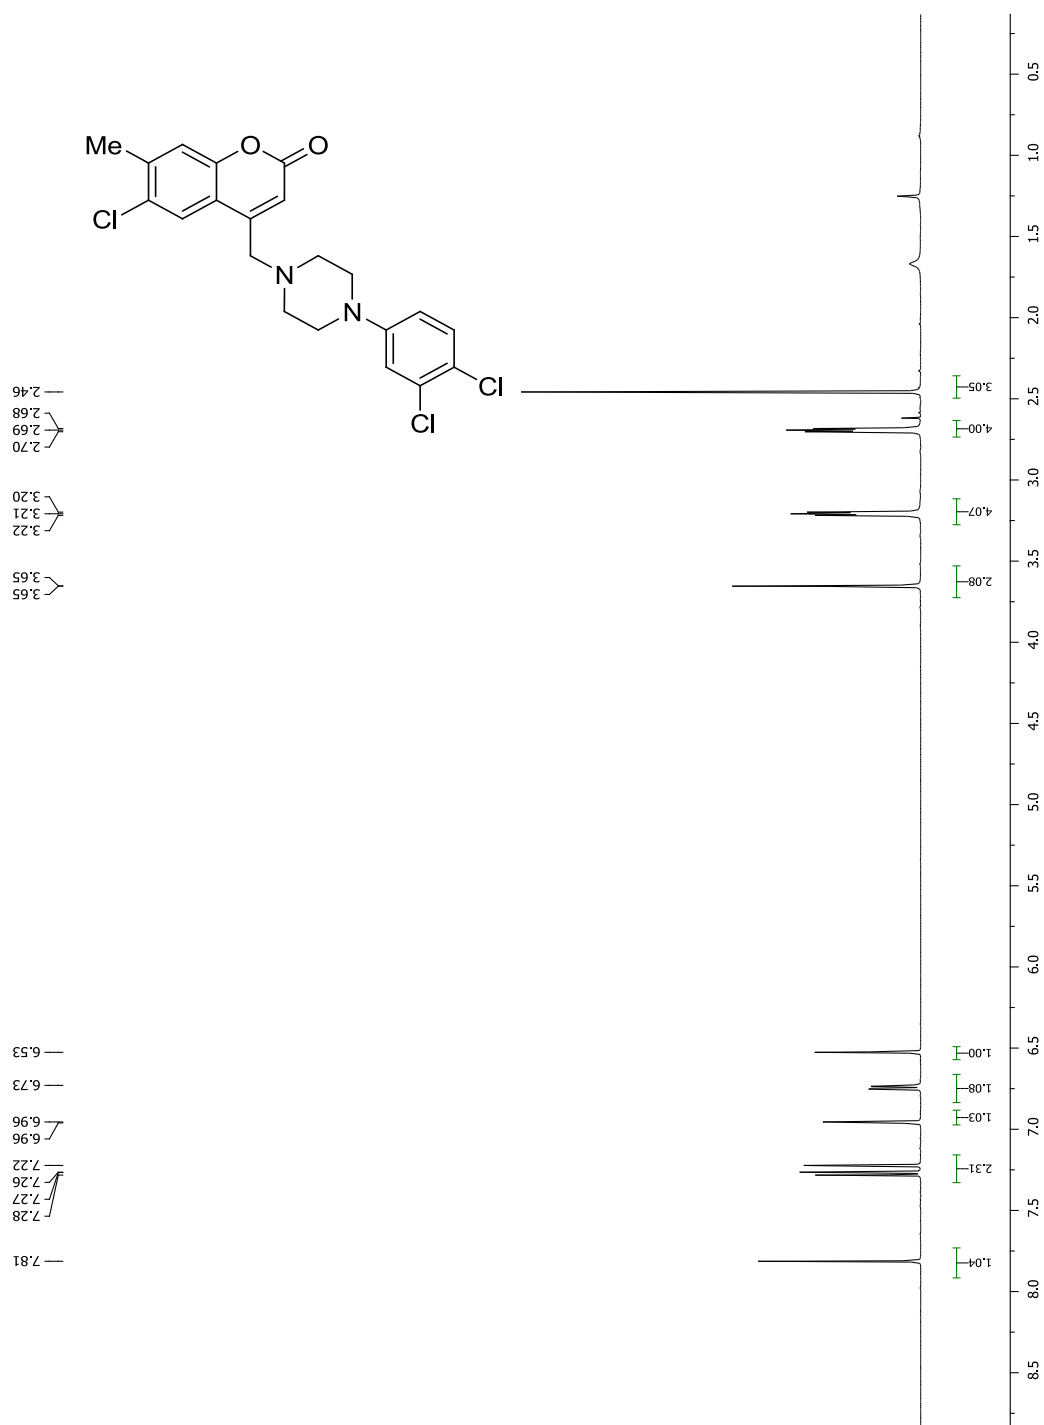

# C2A10

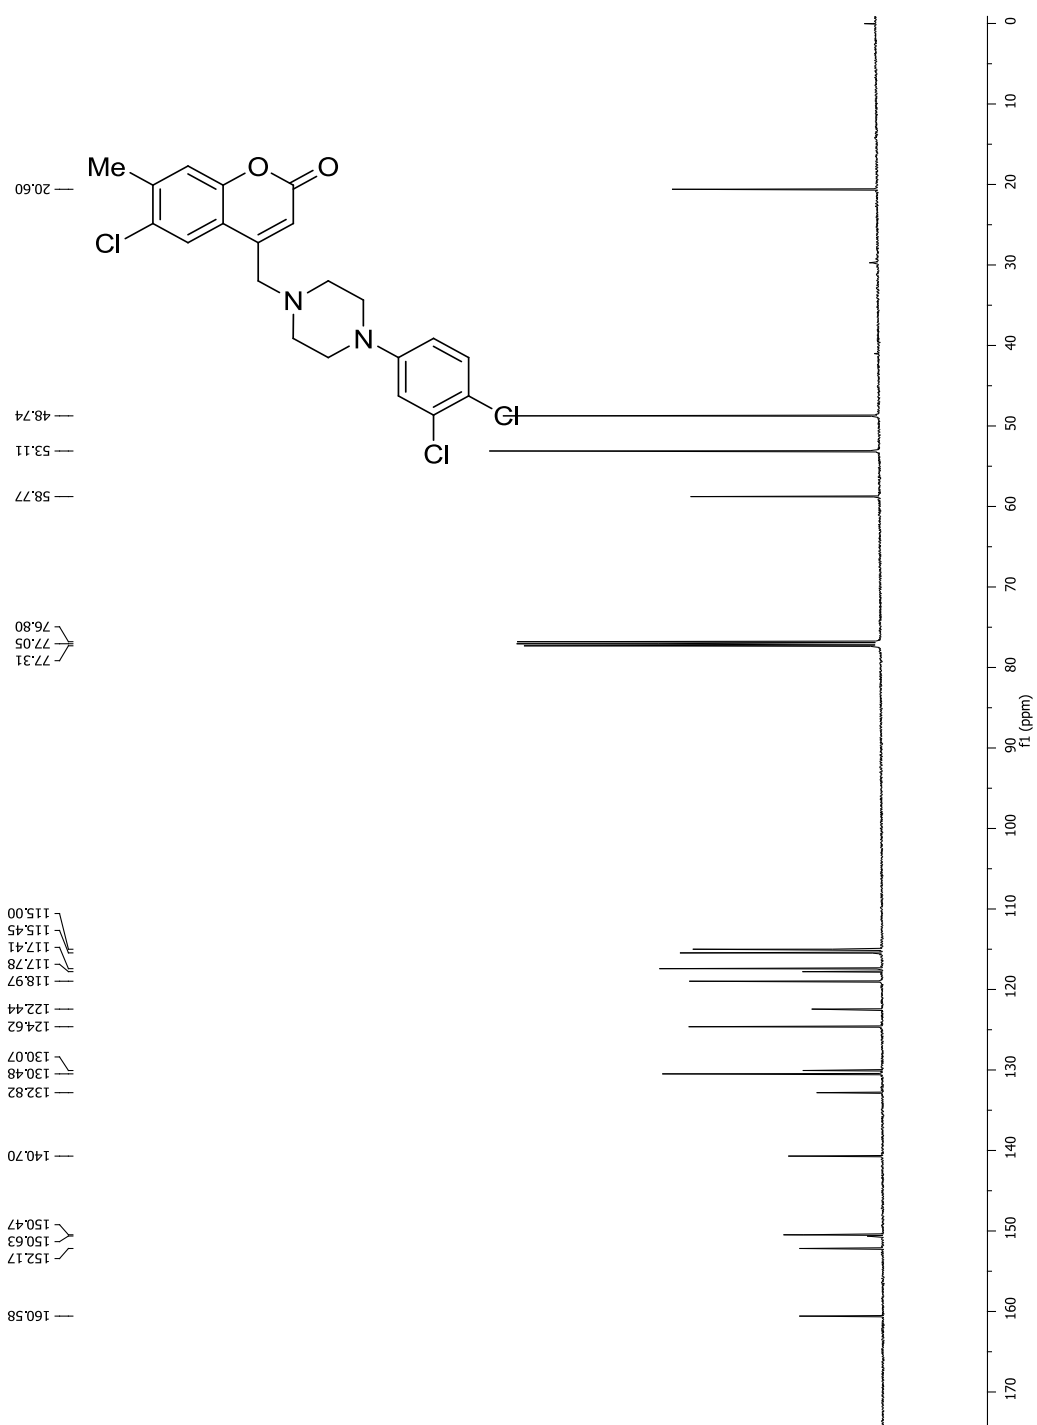

# C2A12

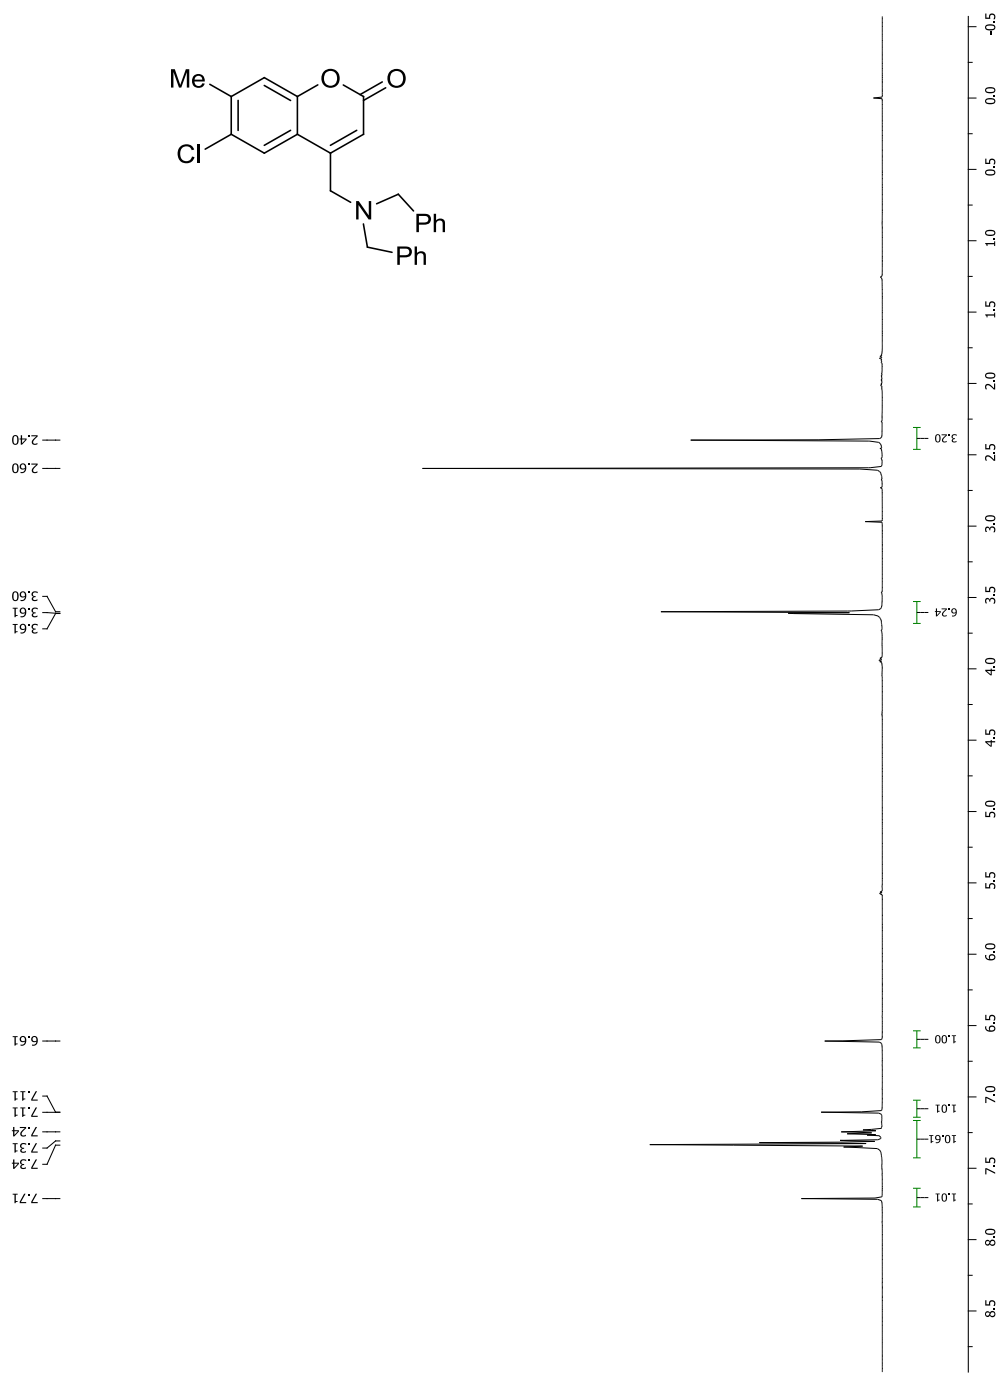



# C2A12

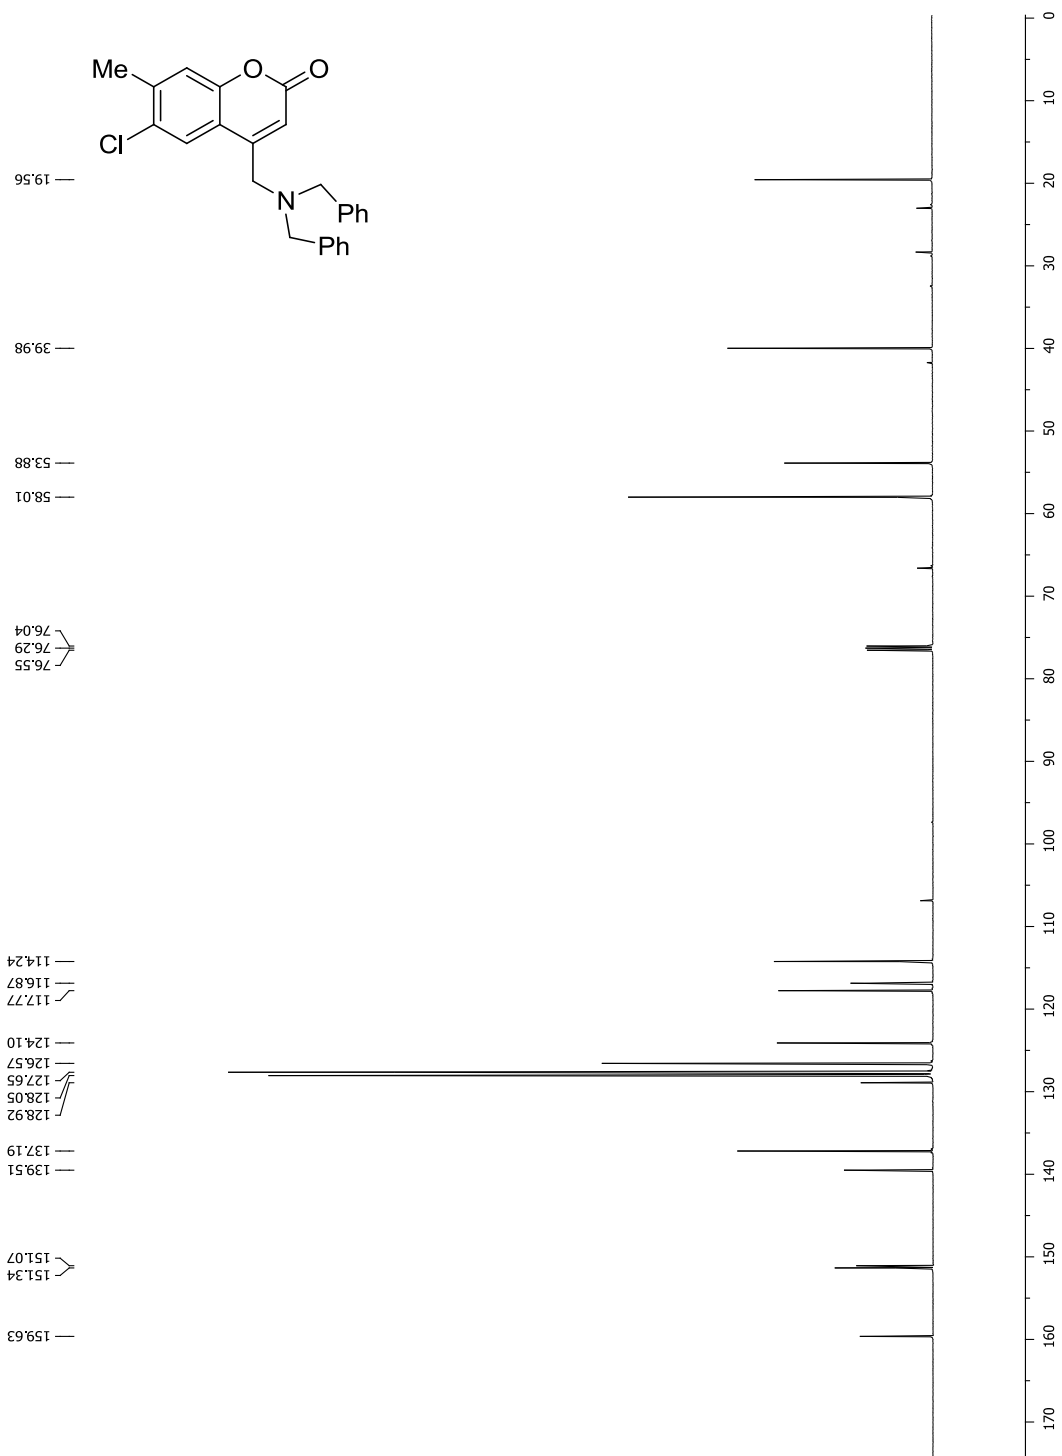

# C2A13

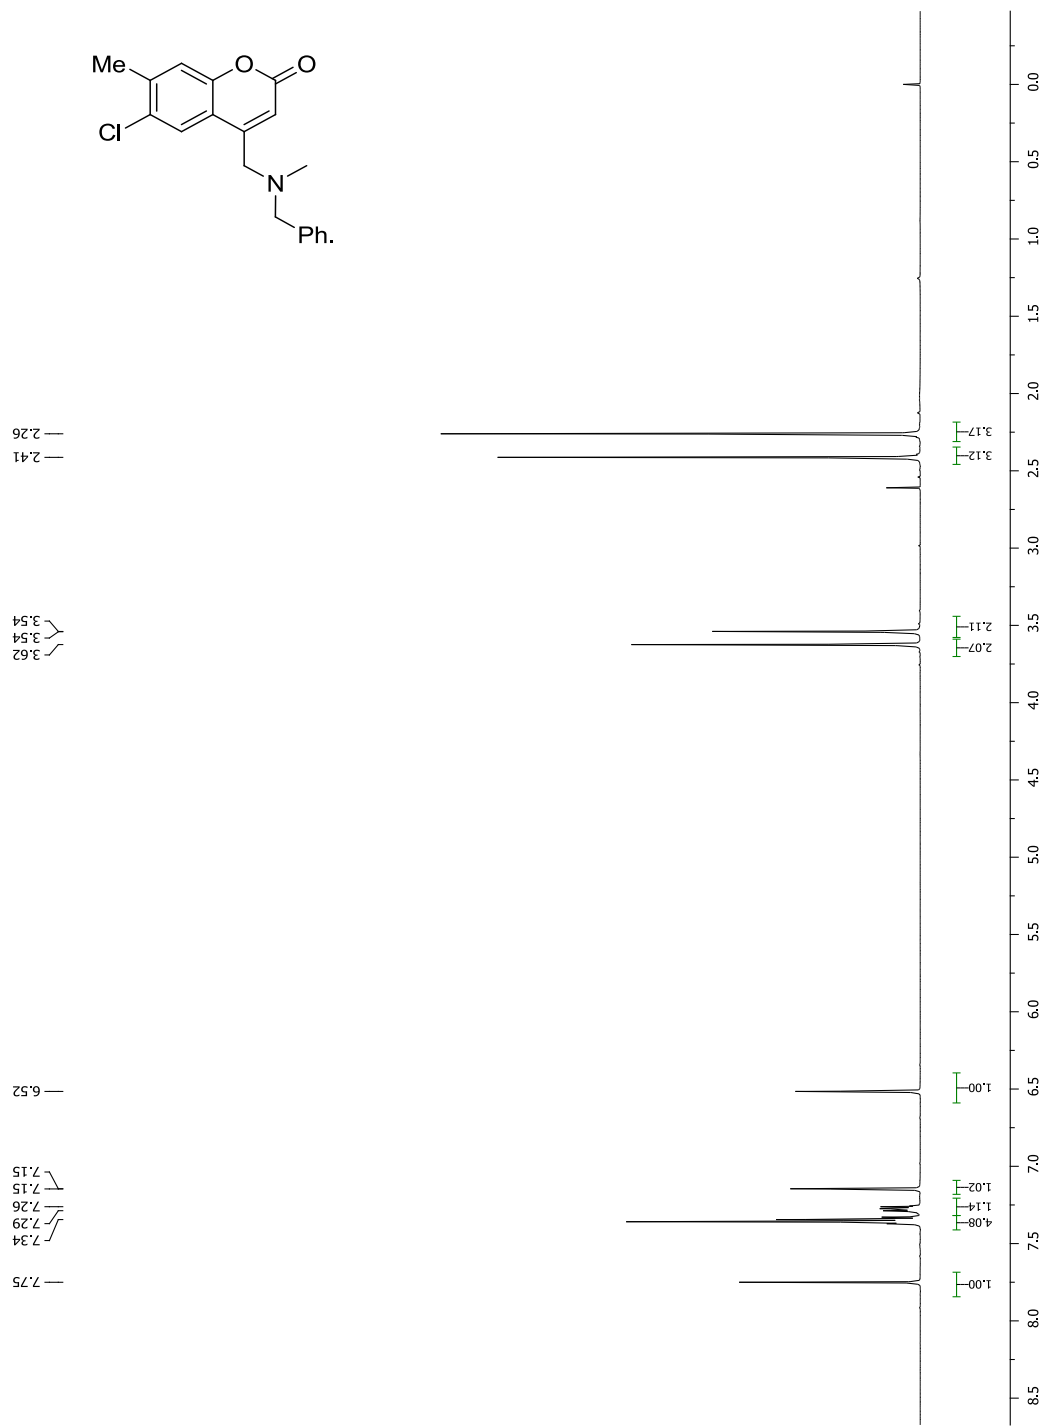

# C2A13

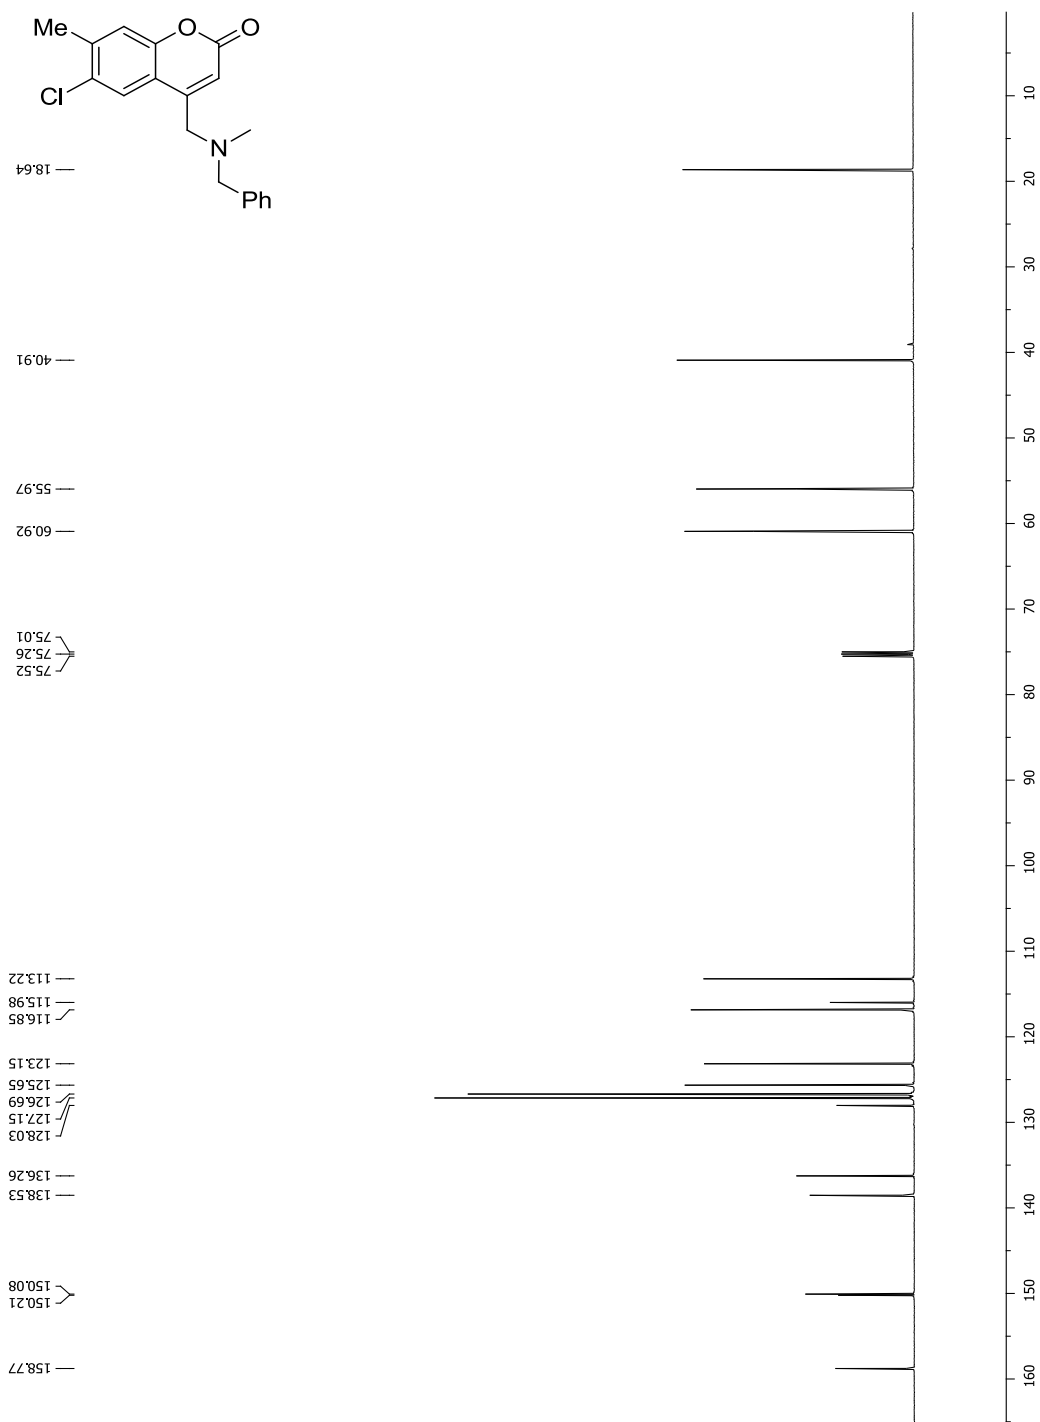

# C3A11

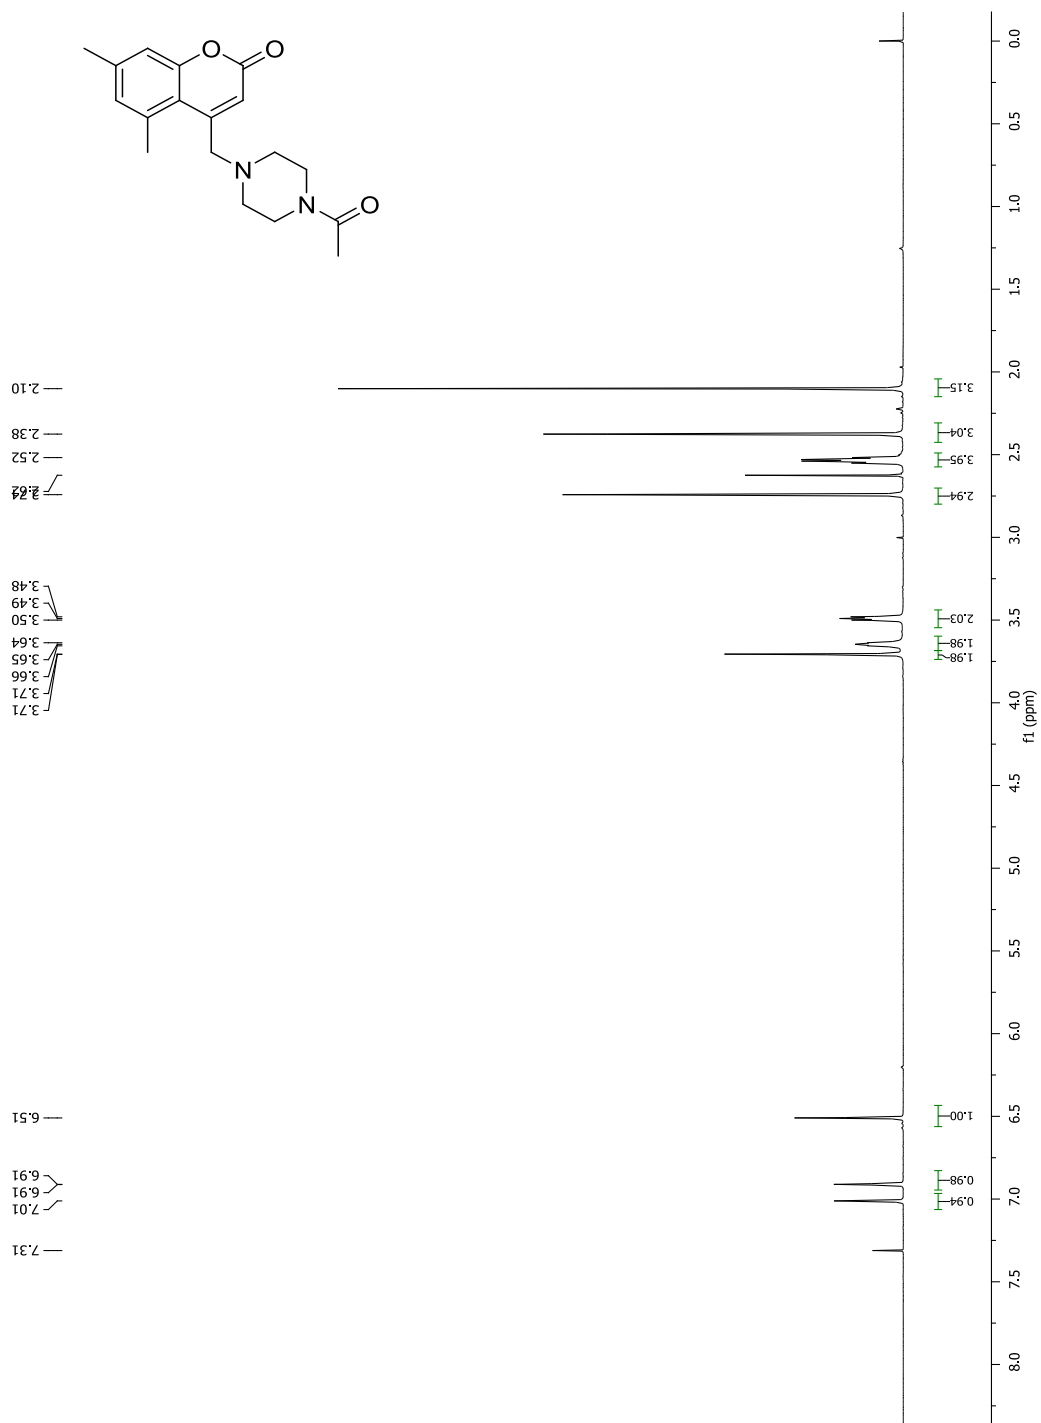

# C3A11

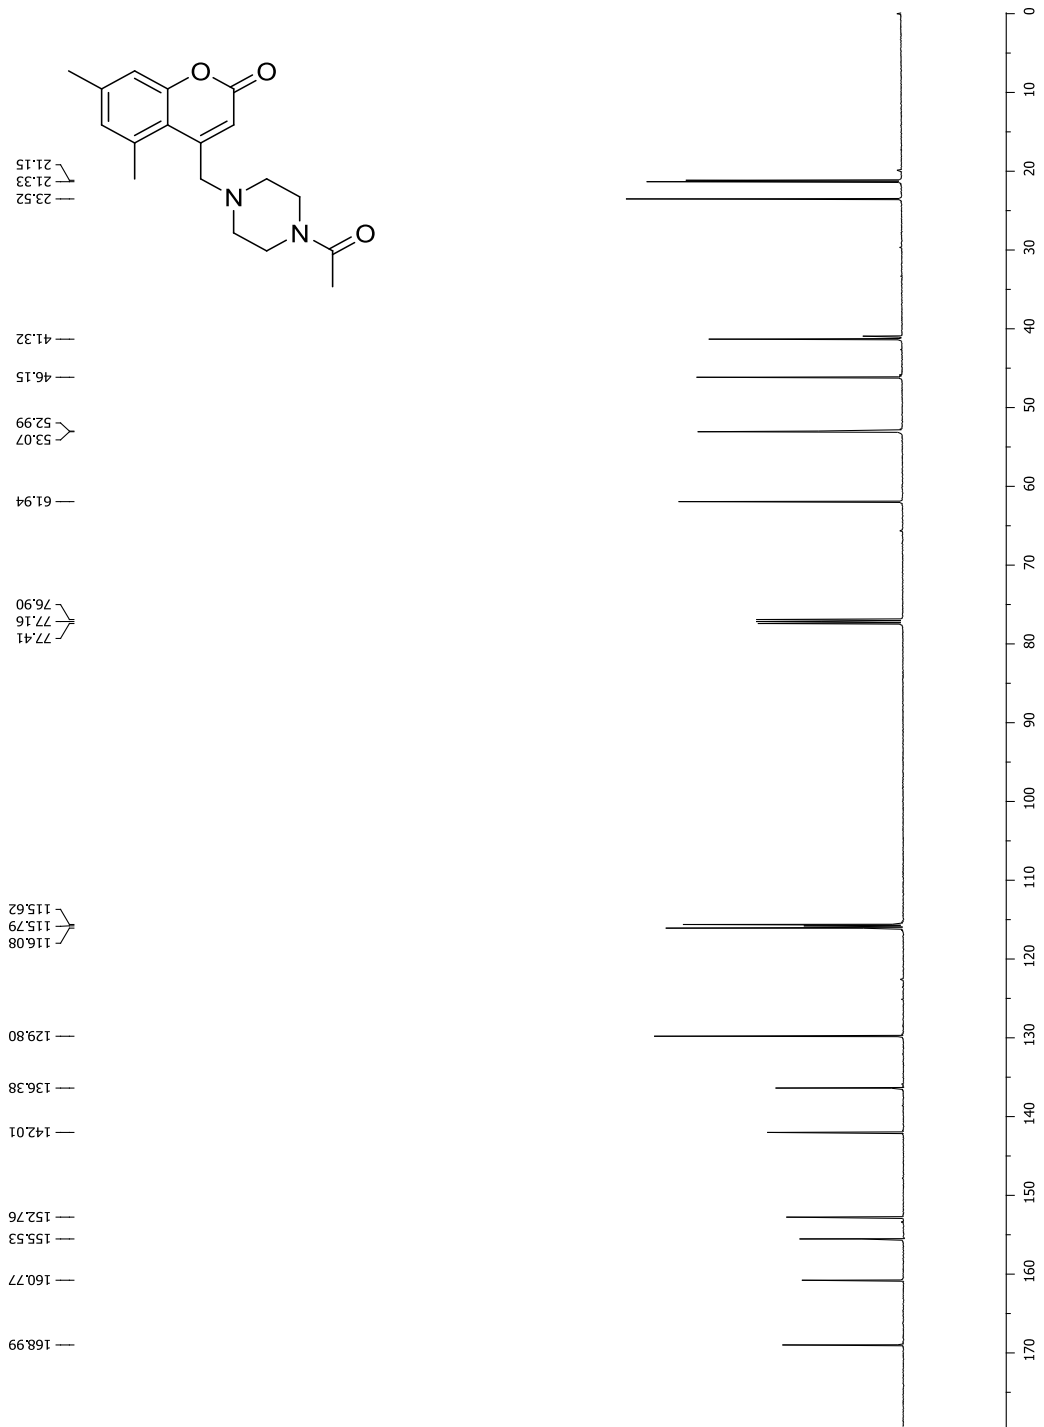

C4A1

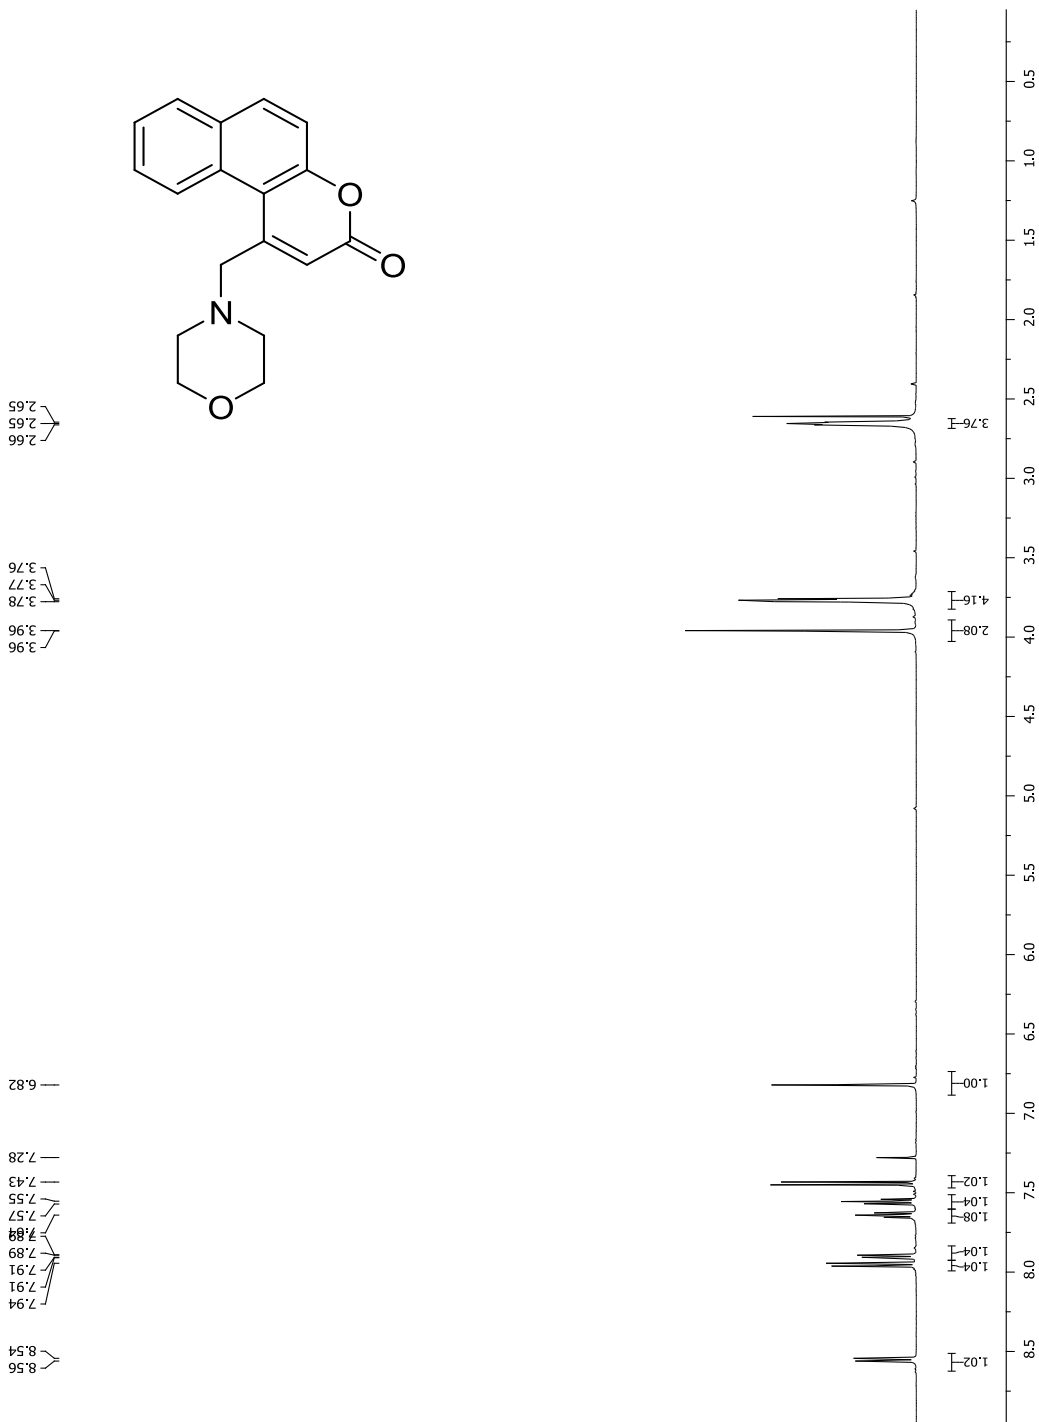

C4A1

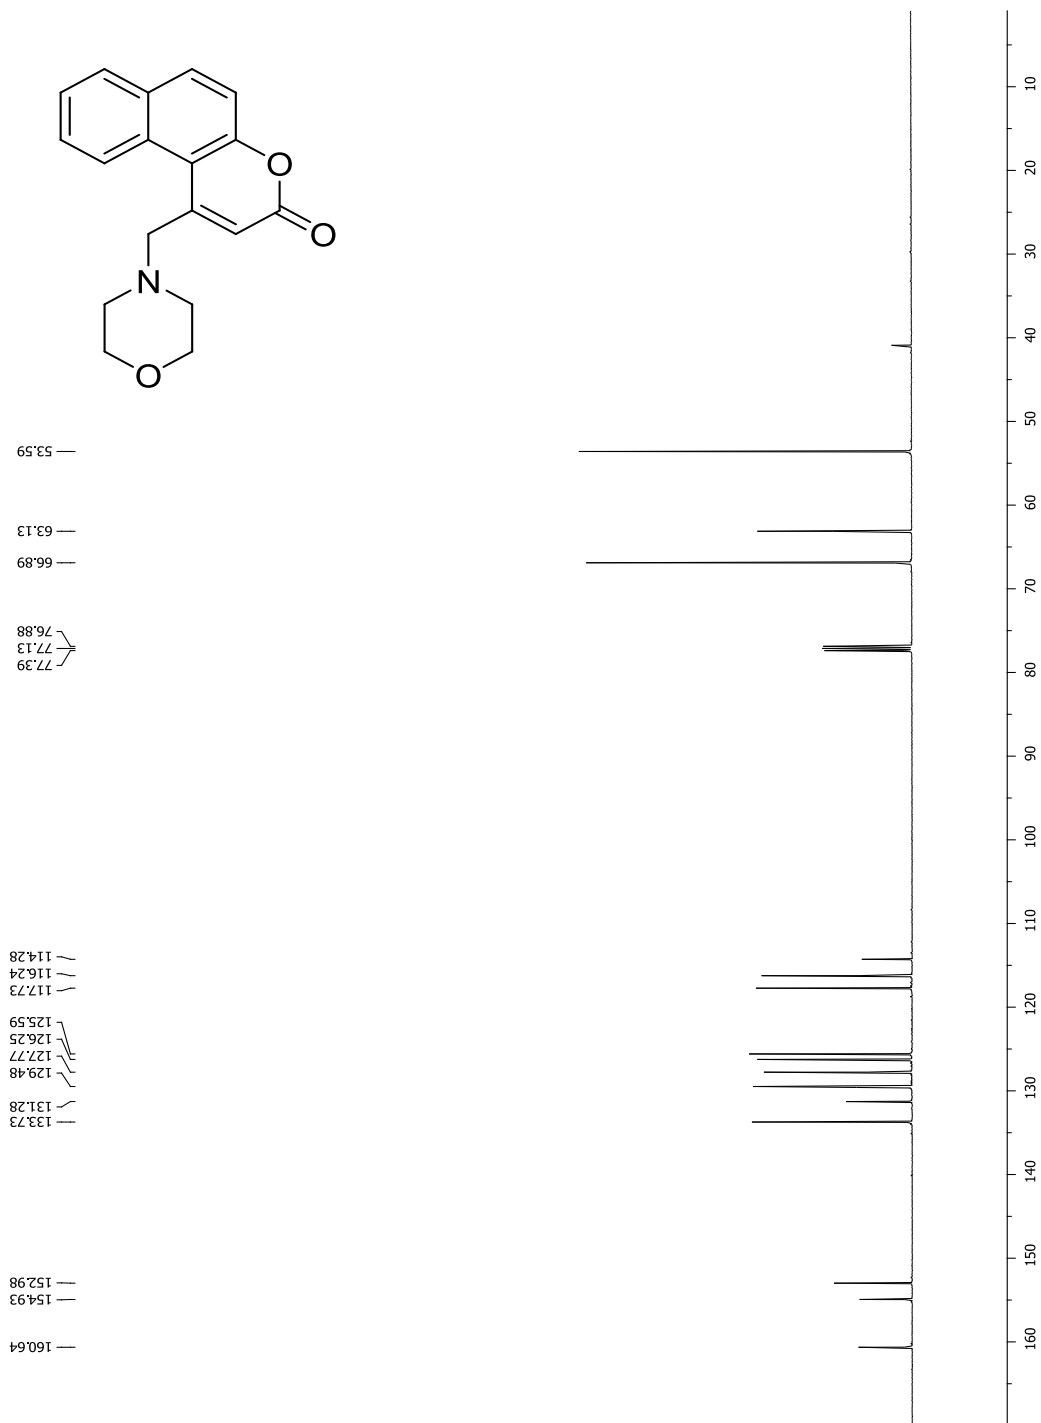

C4A2

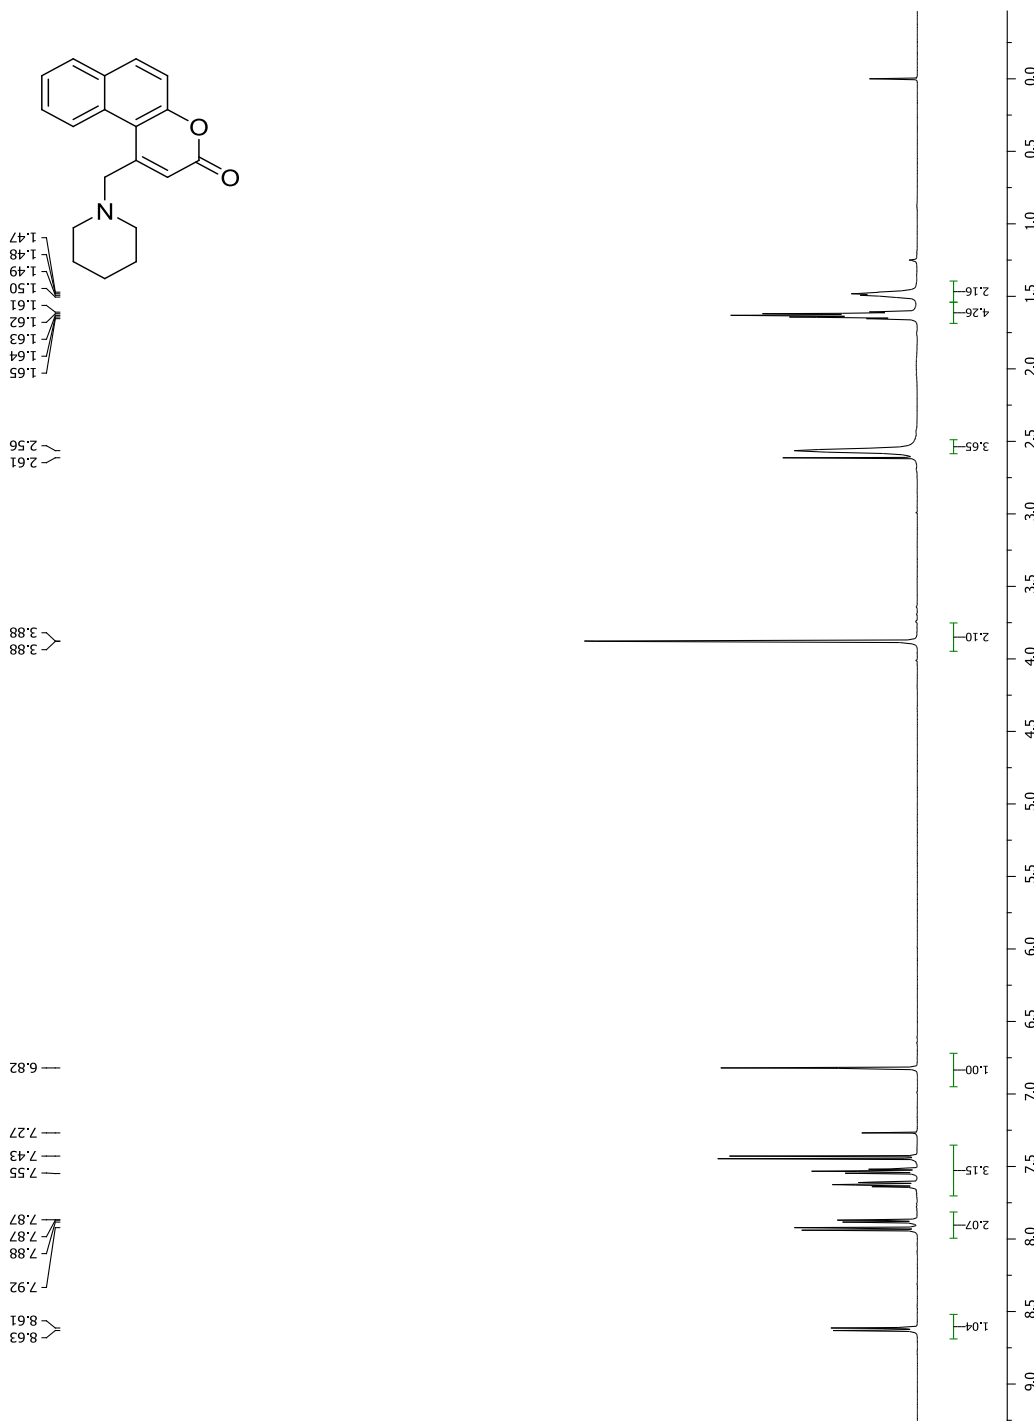



# C4A2

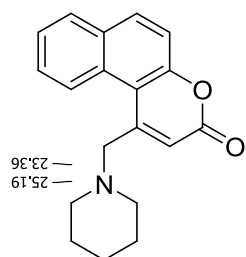

25.19  
23.36

53.84

62.84

76.02  
76.27  
76.53

113.74

115.28

116.89

124.64

125.79

126.81

128.49

130.42

132.65

153.38

154.01

160.08

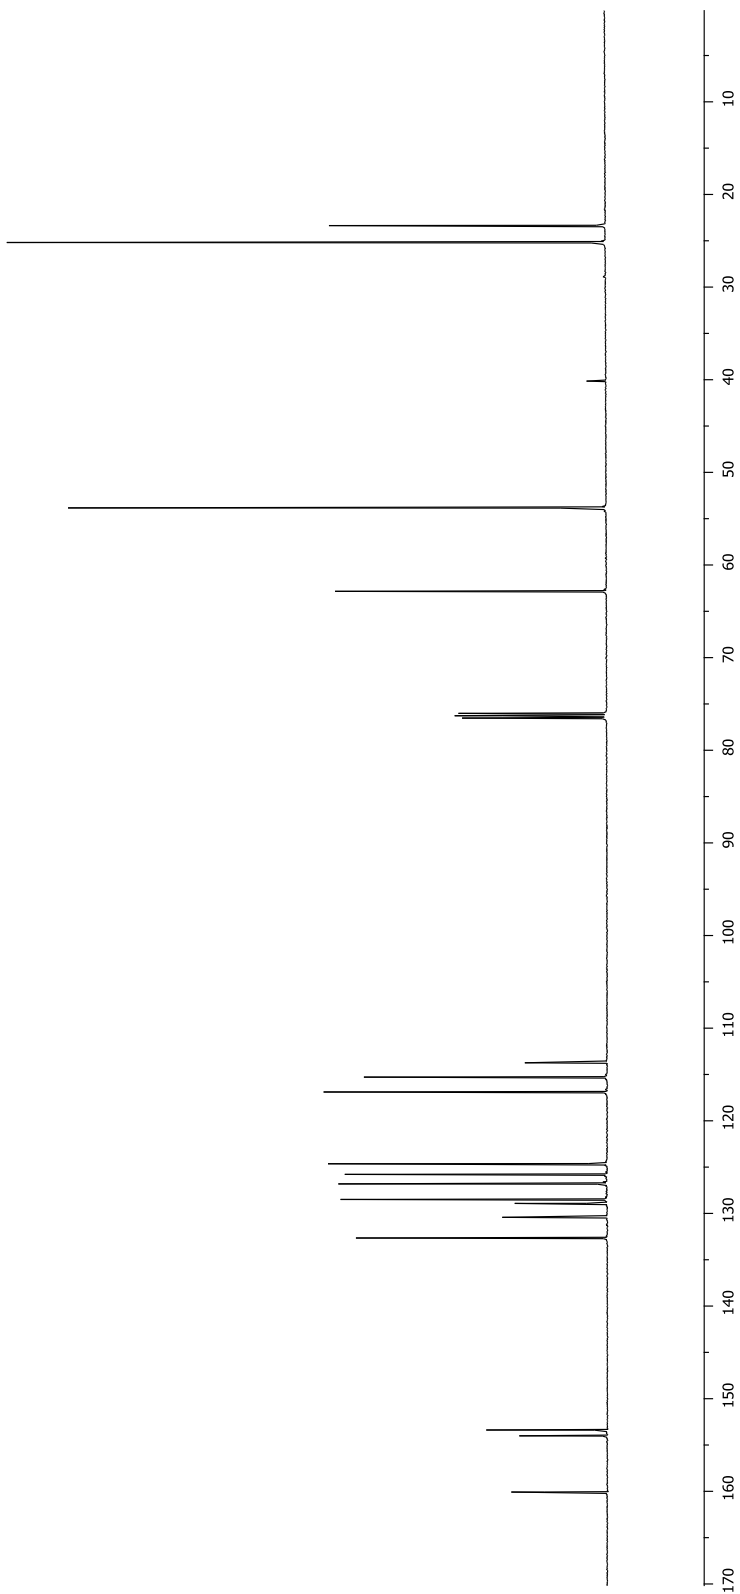

C4A3

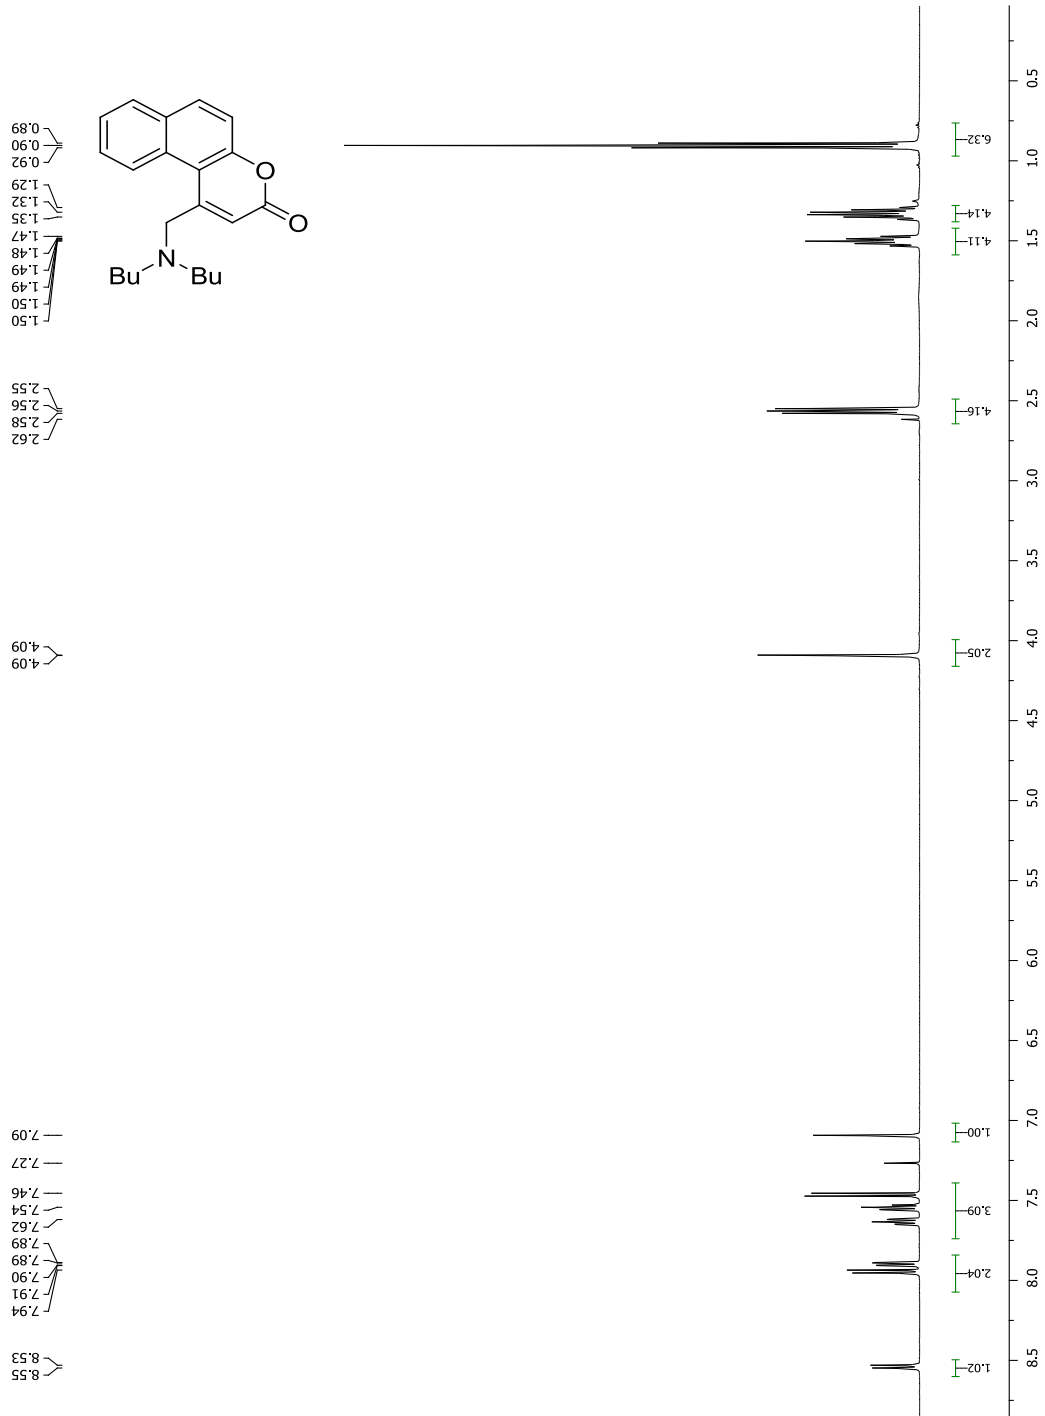

C4A3

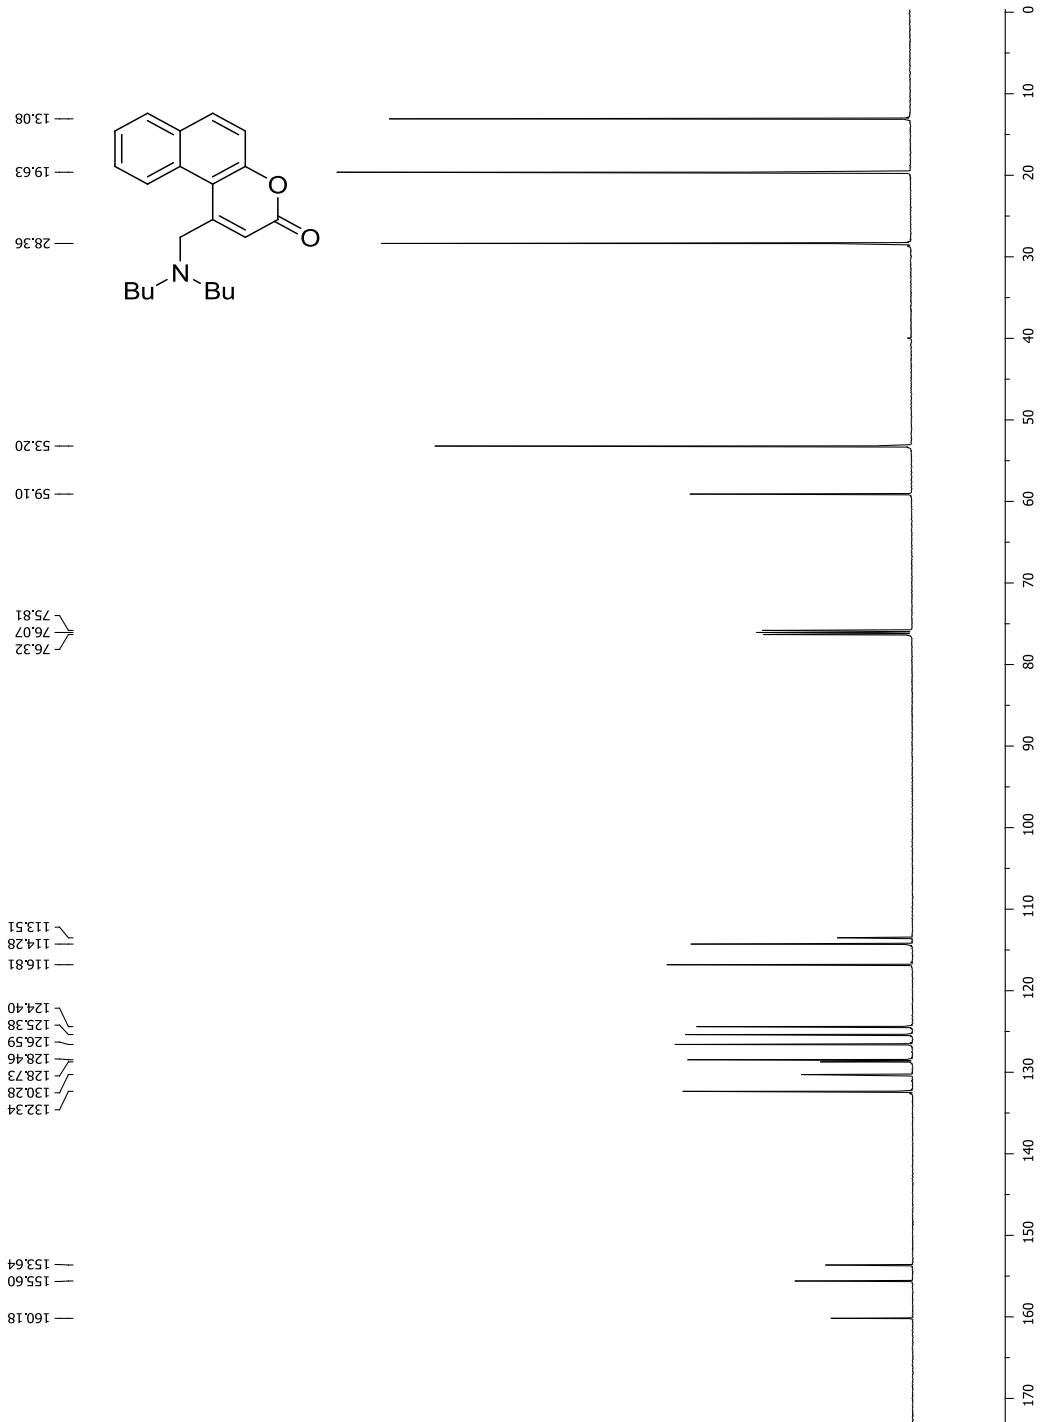

C4A4

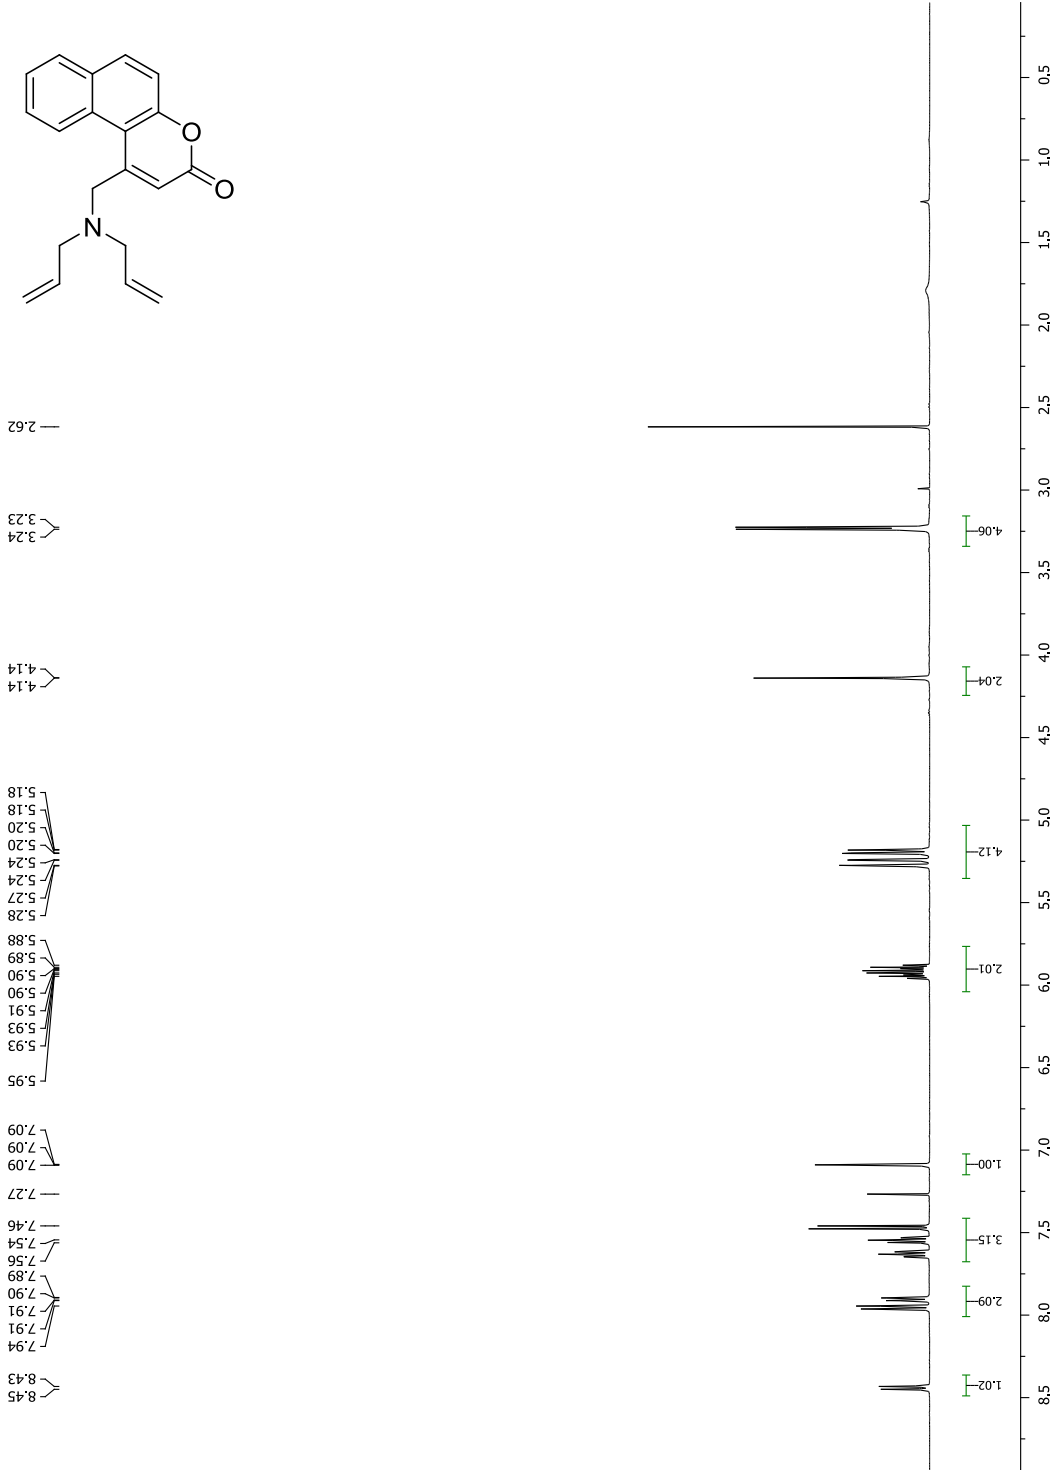

C4A4

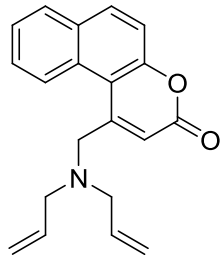

58.22  
56.96

77.33  
77.07  
76.82

134.88  
133.99  
133.99  
129.53  
127.65  
126.19  
125.45  
118.24  
117.83  
115.18  
114.37

161.06  
155.78  
154.73

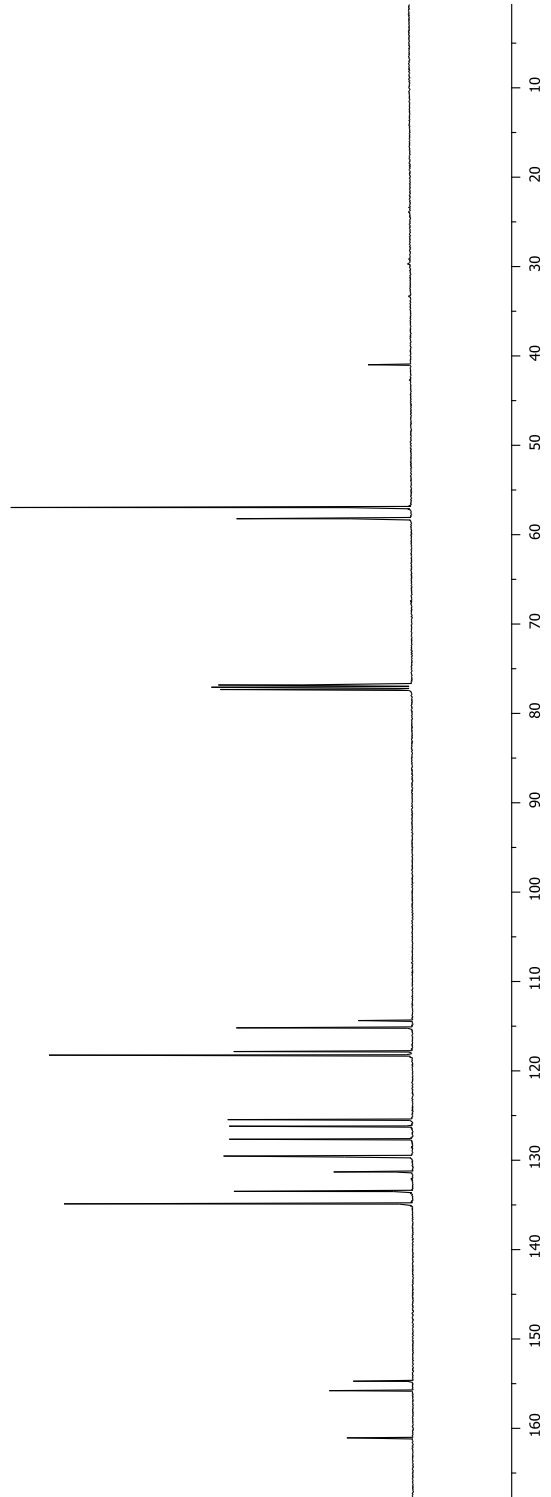

C4A14

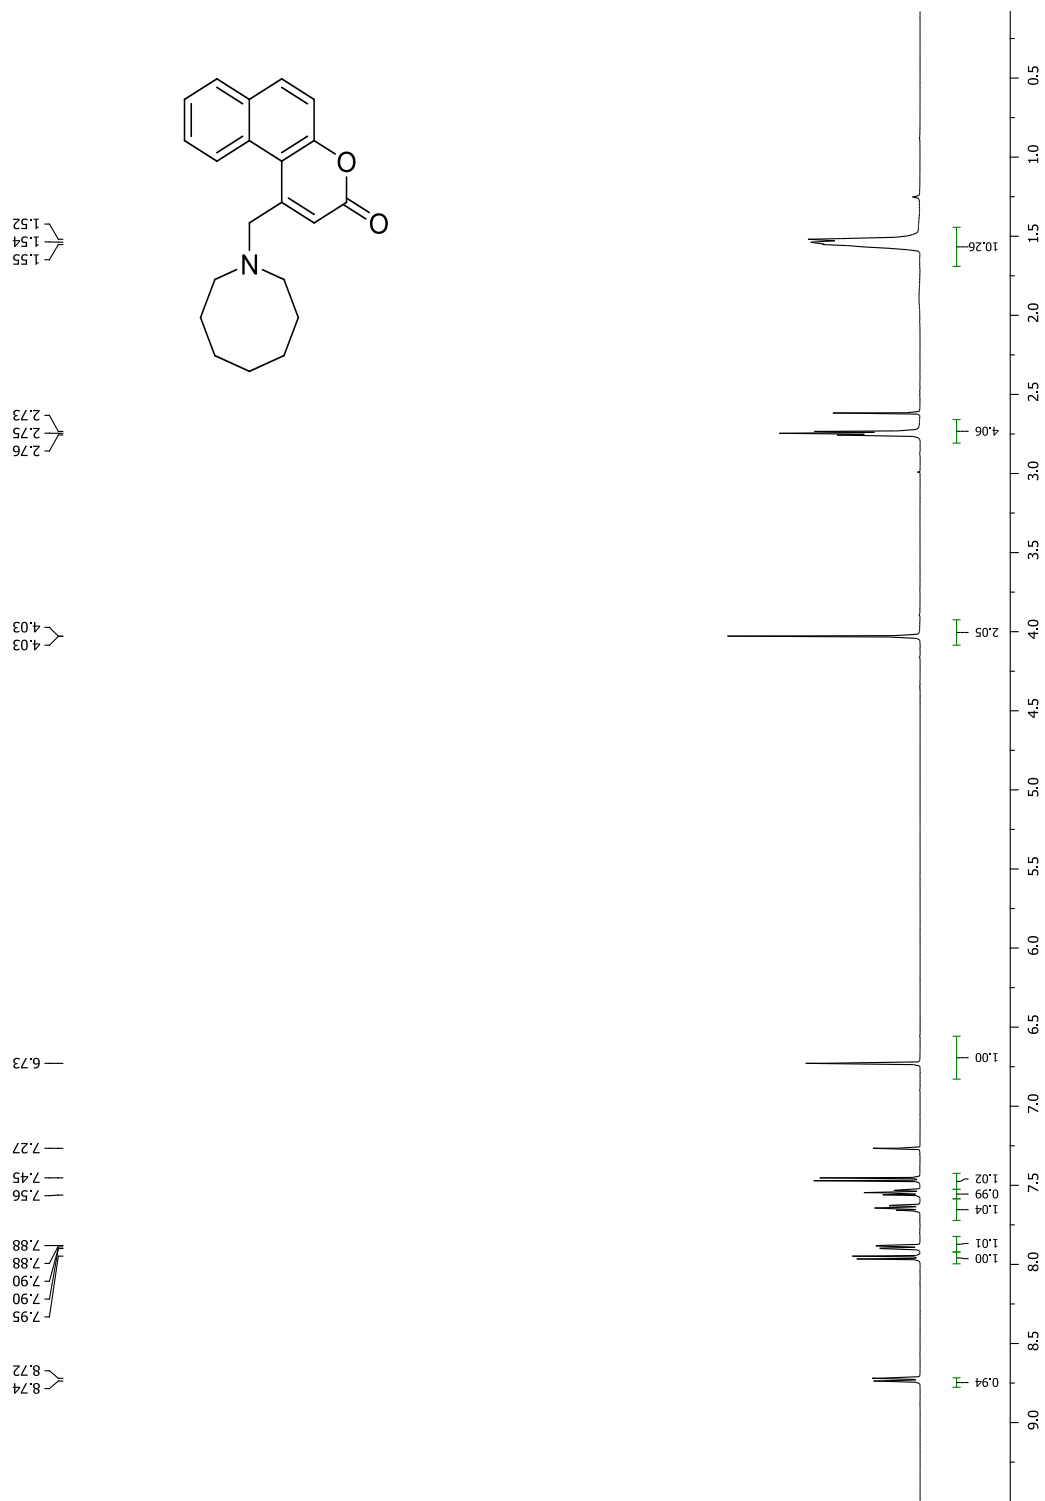

C4A14

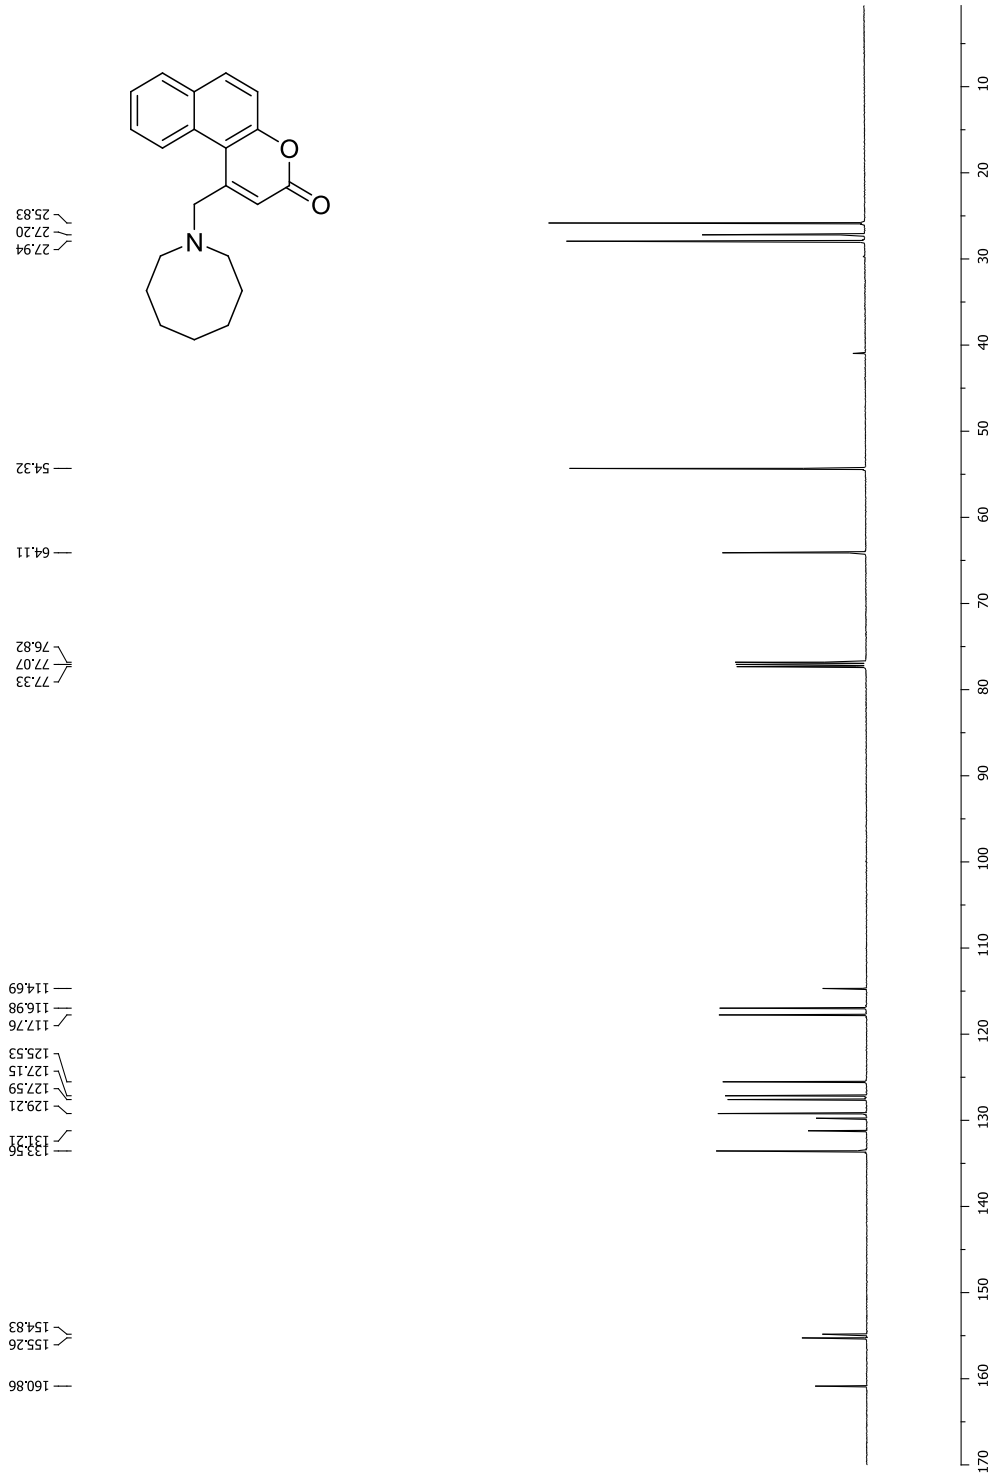

C4A16

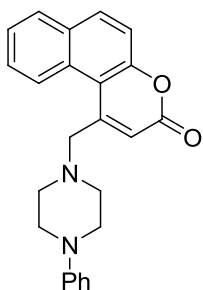

2.83  
2.82  
2.81

3.26  
3.25  
3.24

4.02

6.94  
6.94  
6.93  
6.88  
6.88  
6.87  
6.87  
6.85

7.25  
7.46  
7.55  
7.63  
7.63  
7.89  
7.90  
7.91  
7.91  
7.96

8.60  
8.62

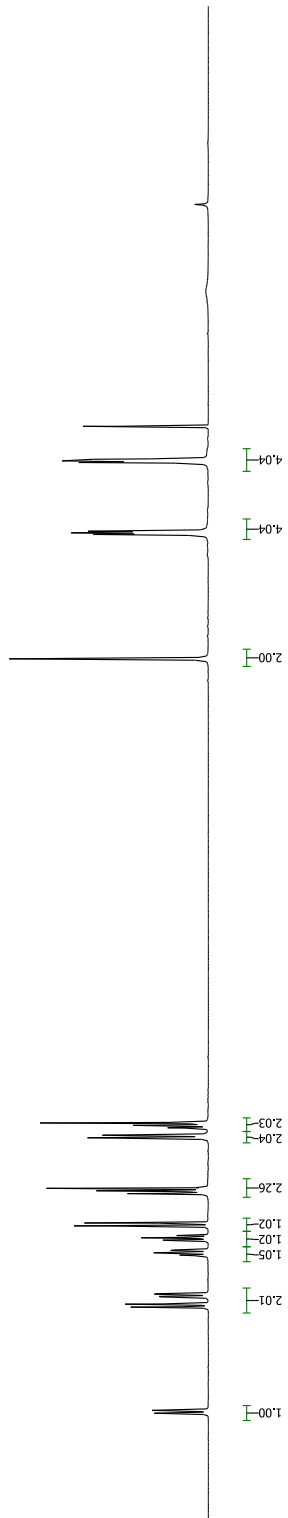



# C4A16

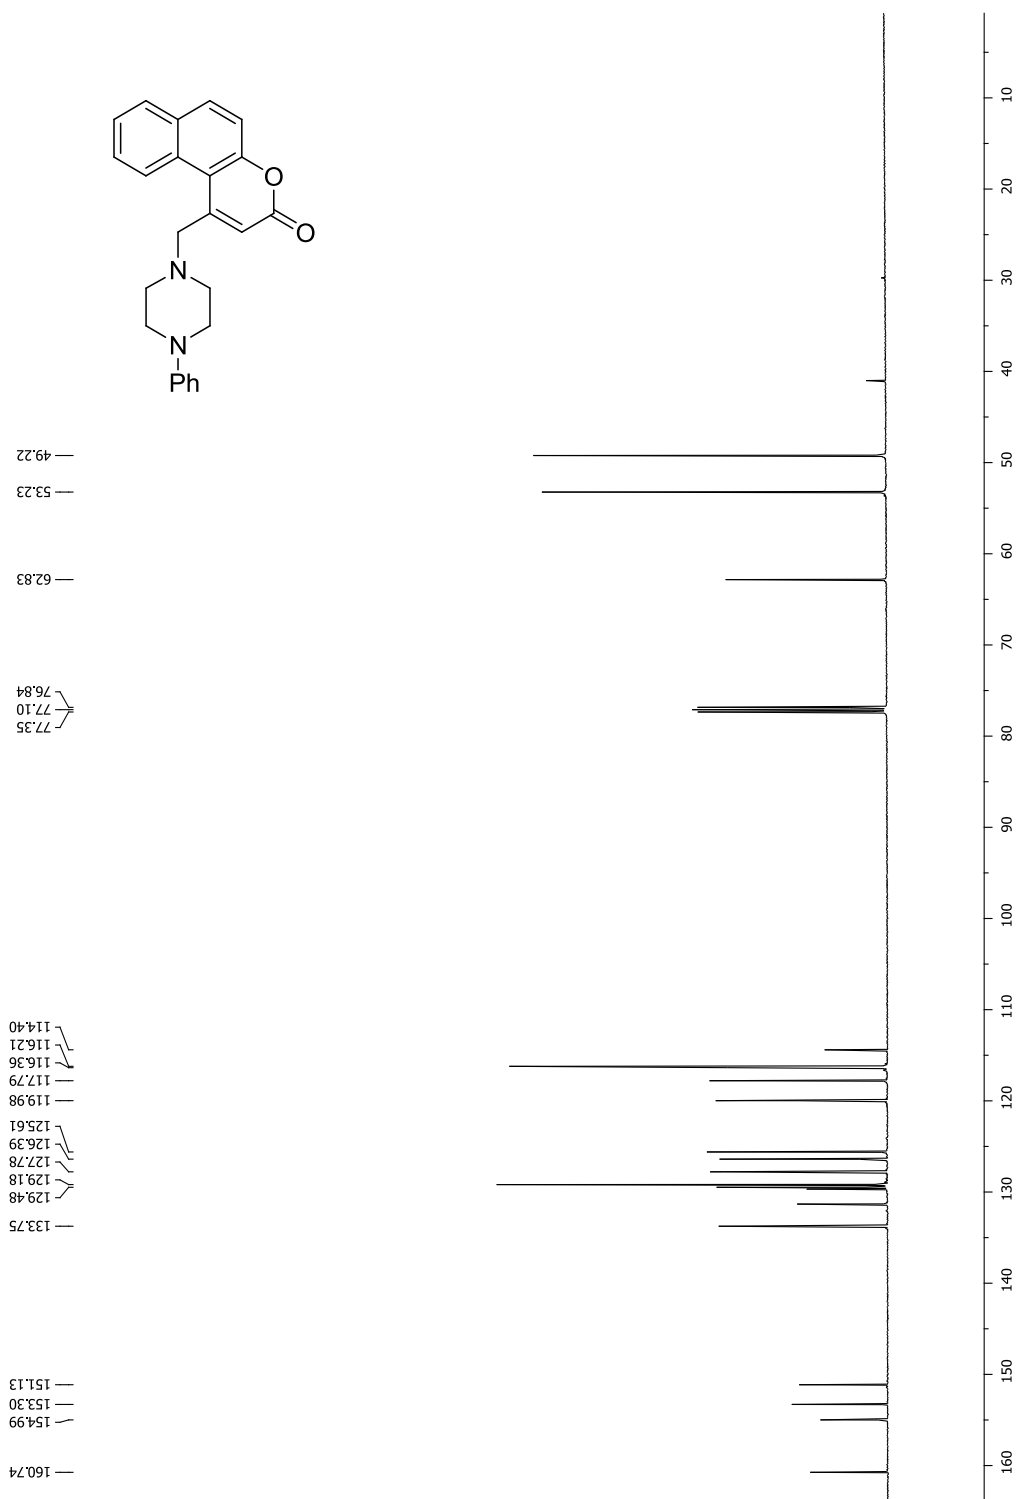

# C5A11

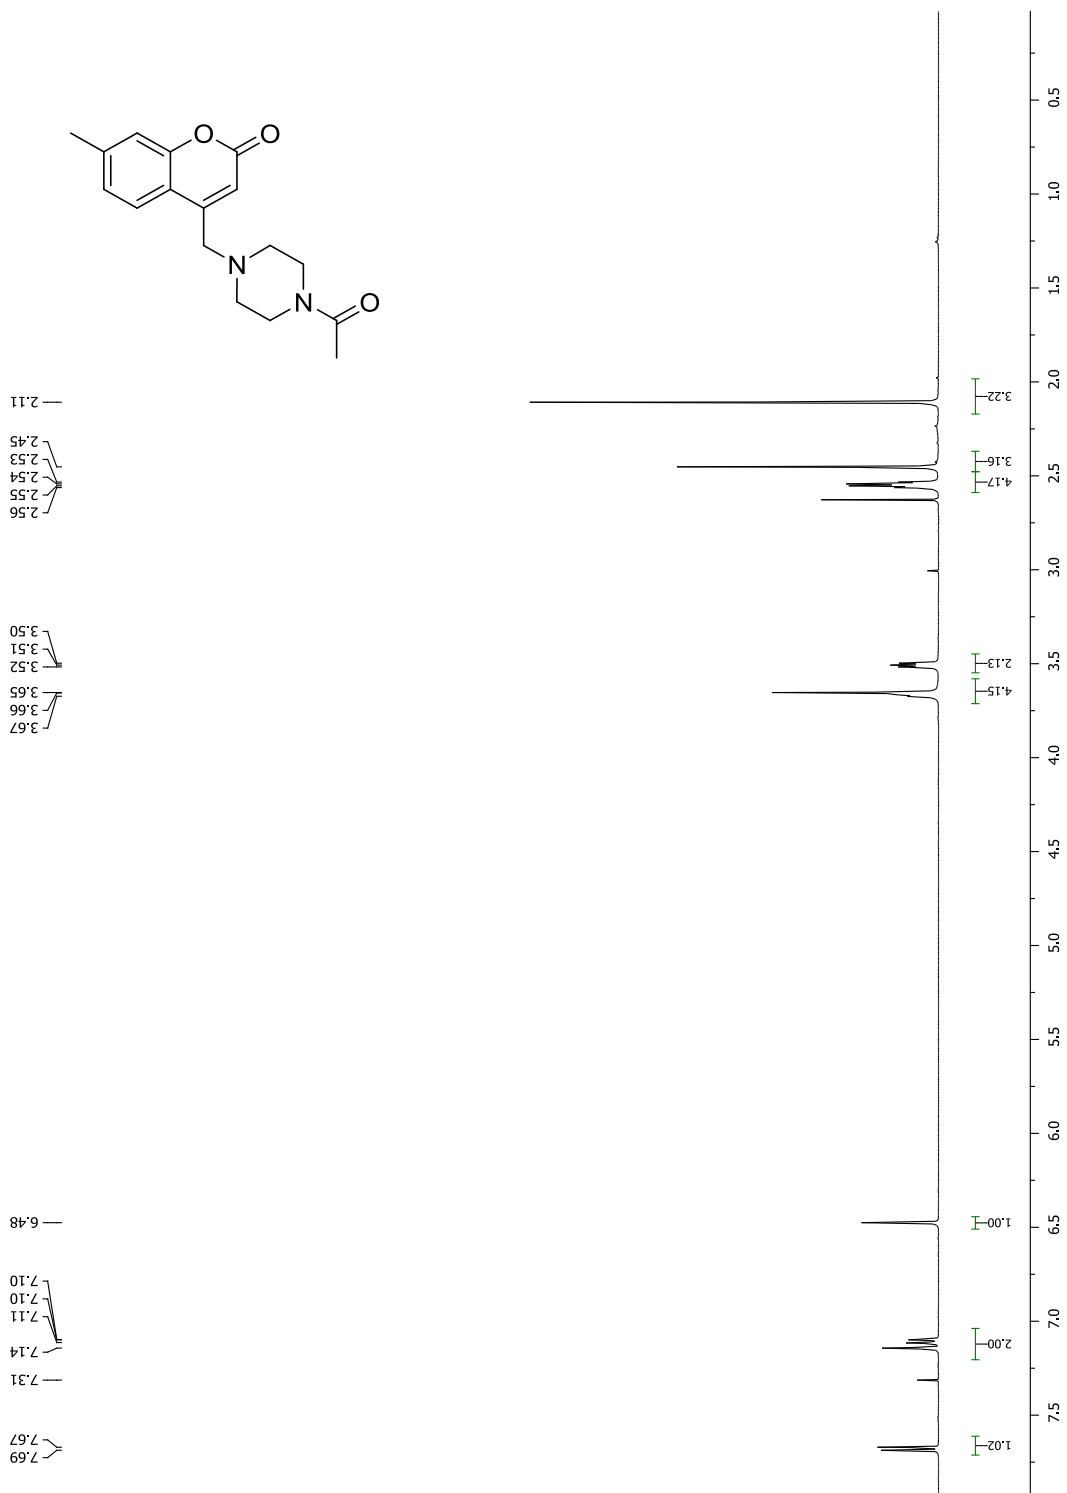

# C5A11

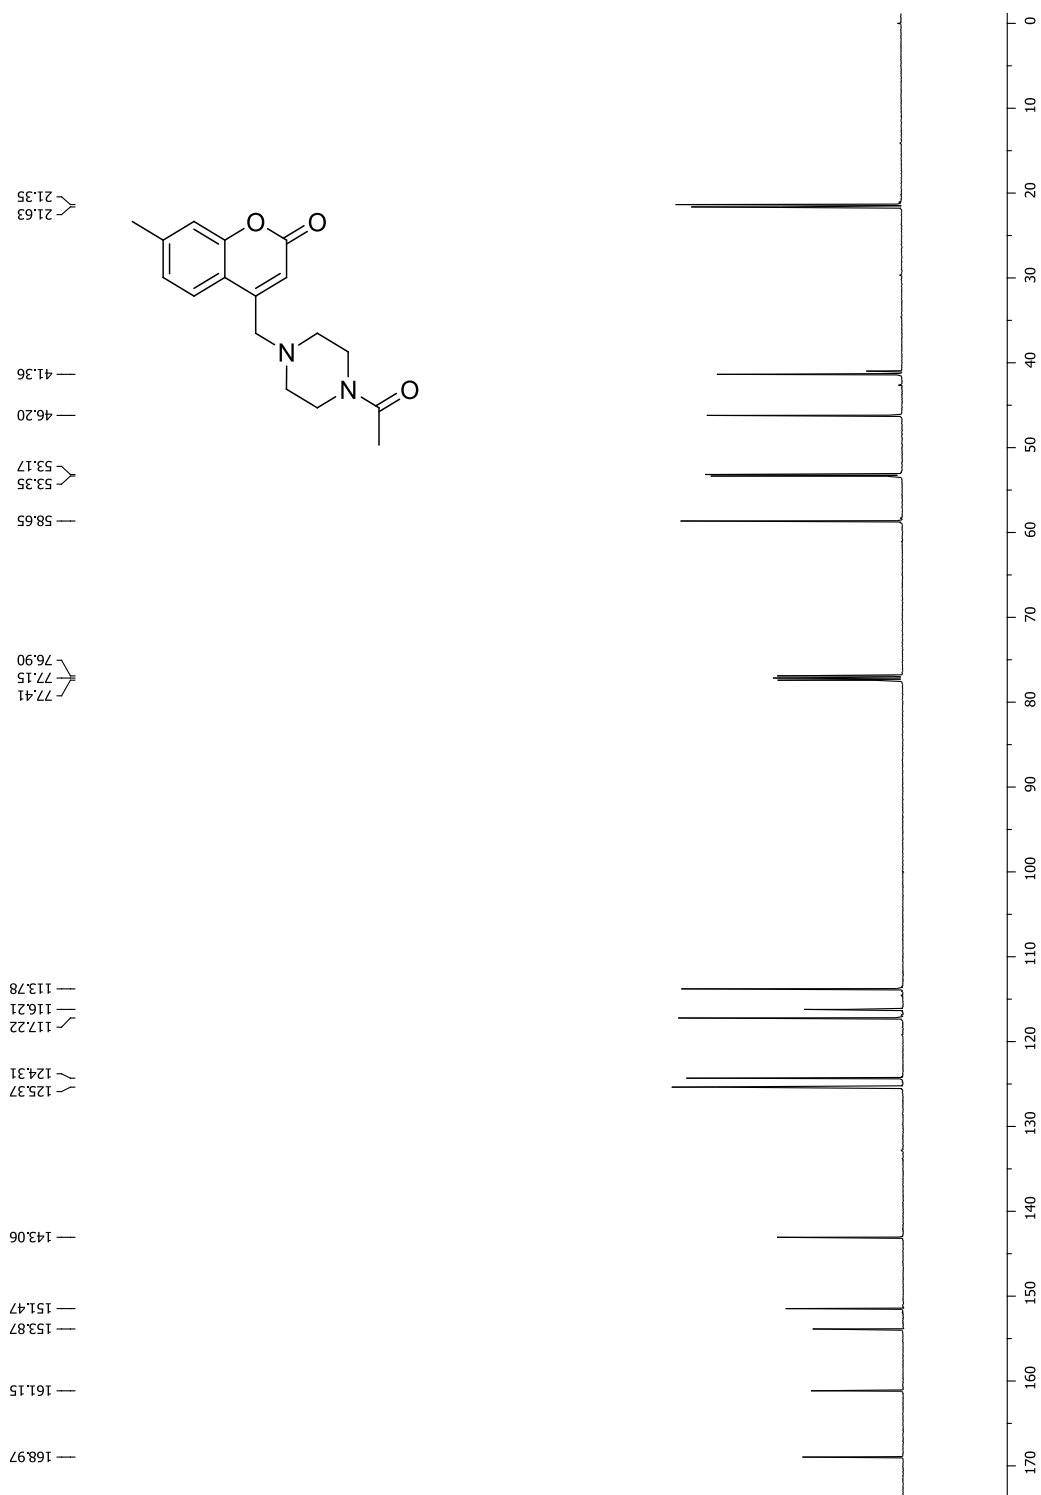

# C6A4

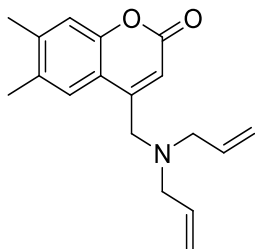

2.33  
2.31

3.17  
3.16

3.69  
3.69

5.17  
5.17  
5.19  
5.19  
5.19  
5.22  
5.22  
5.25  
5.25

5.84  
5.85  
5.86  
5.87  
5.88  
5.89

6.57  
6.56

7.09

7.47

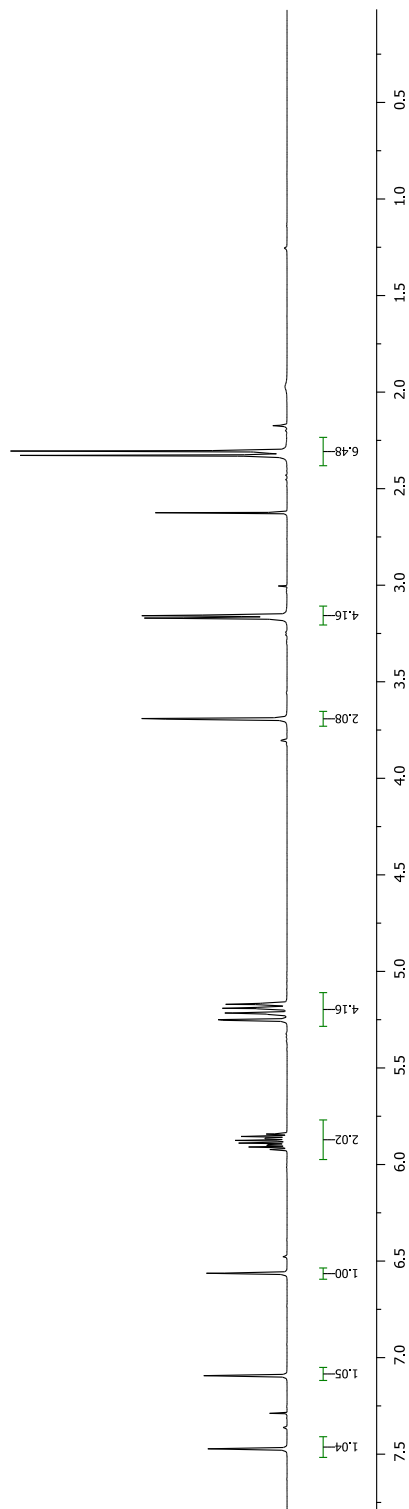

# C6A4

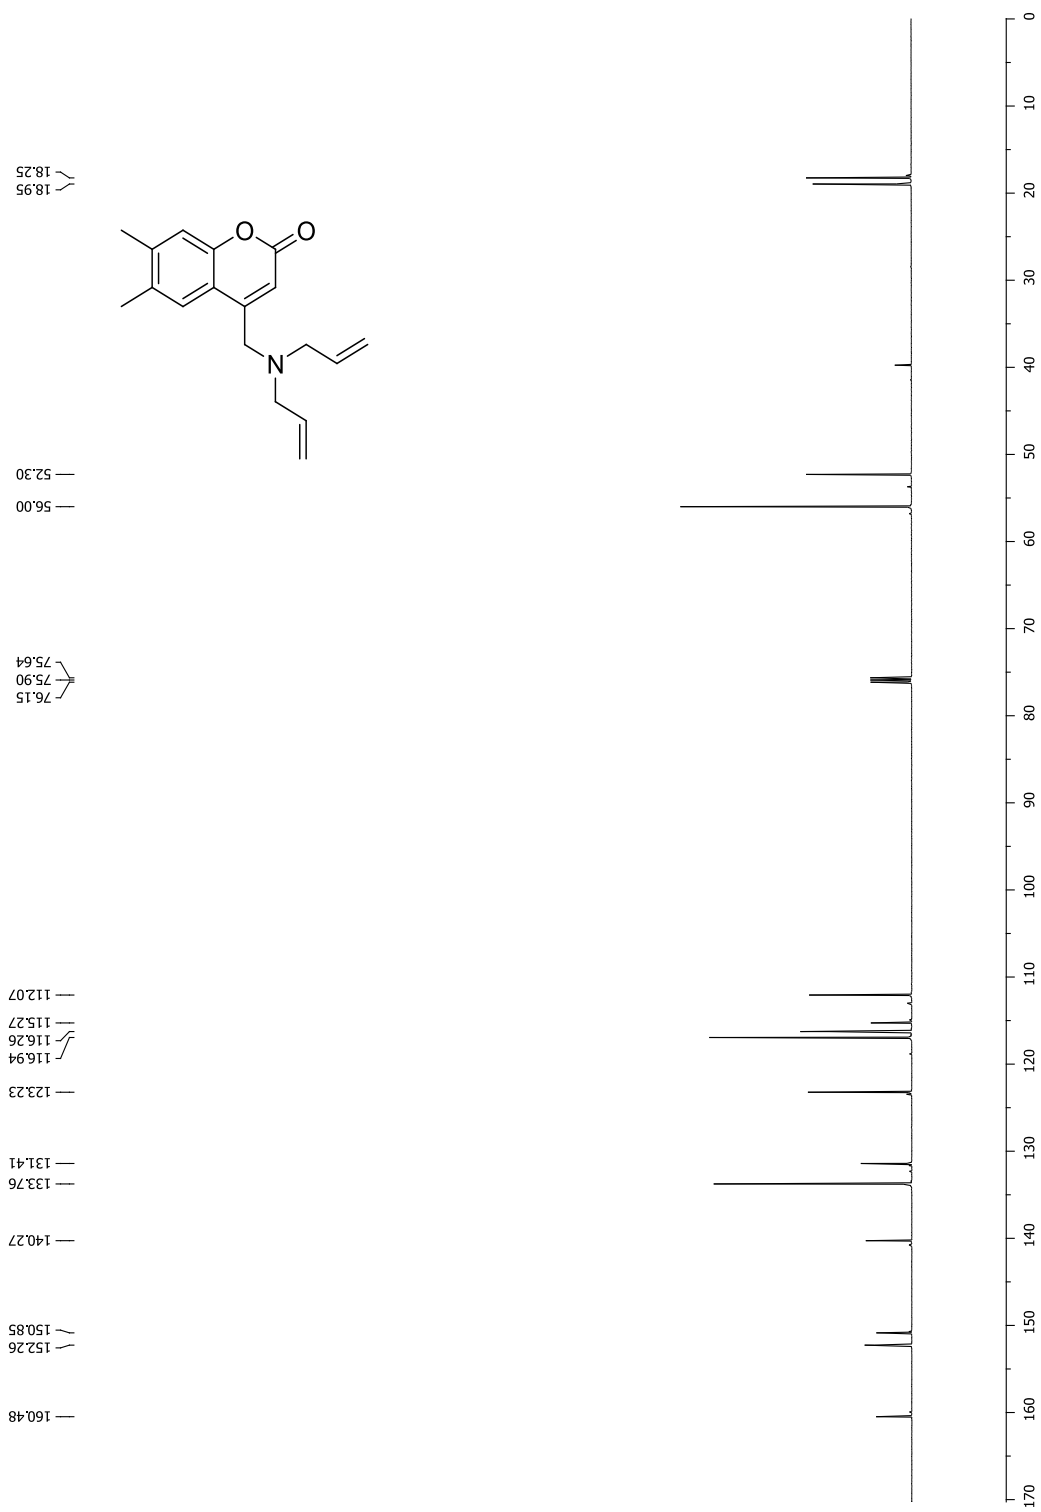

# C6A6

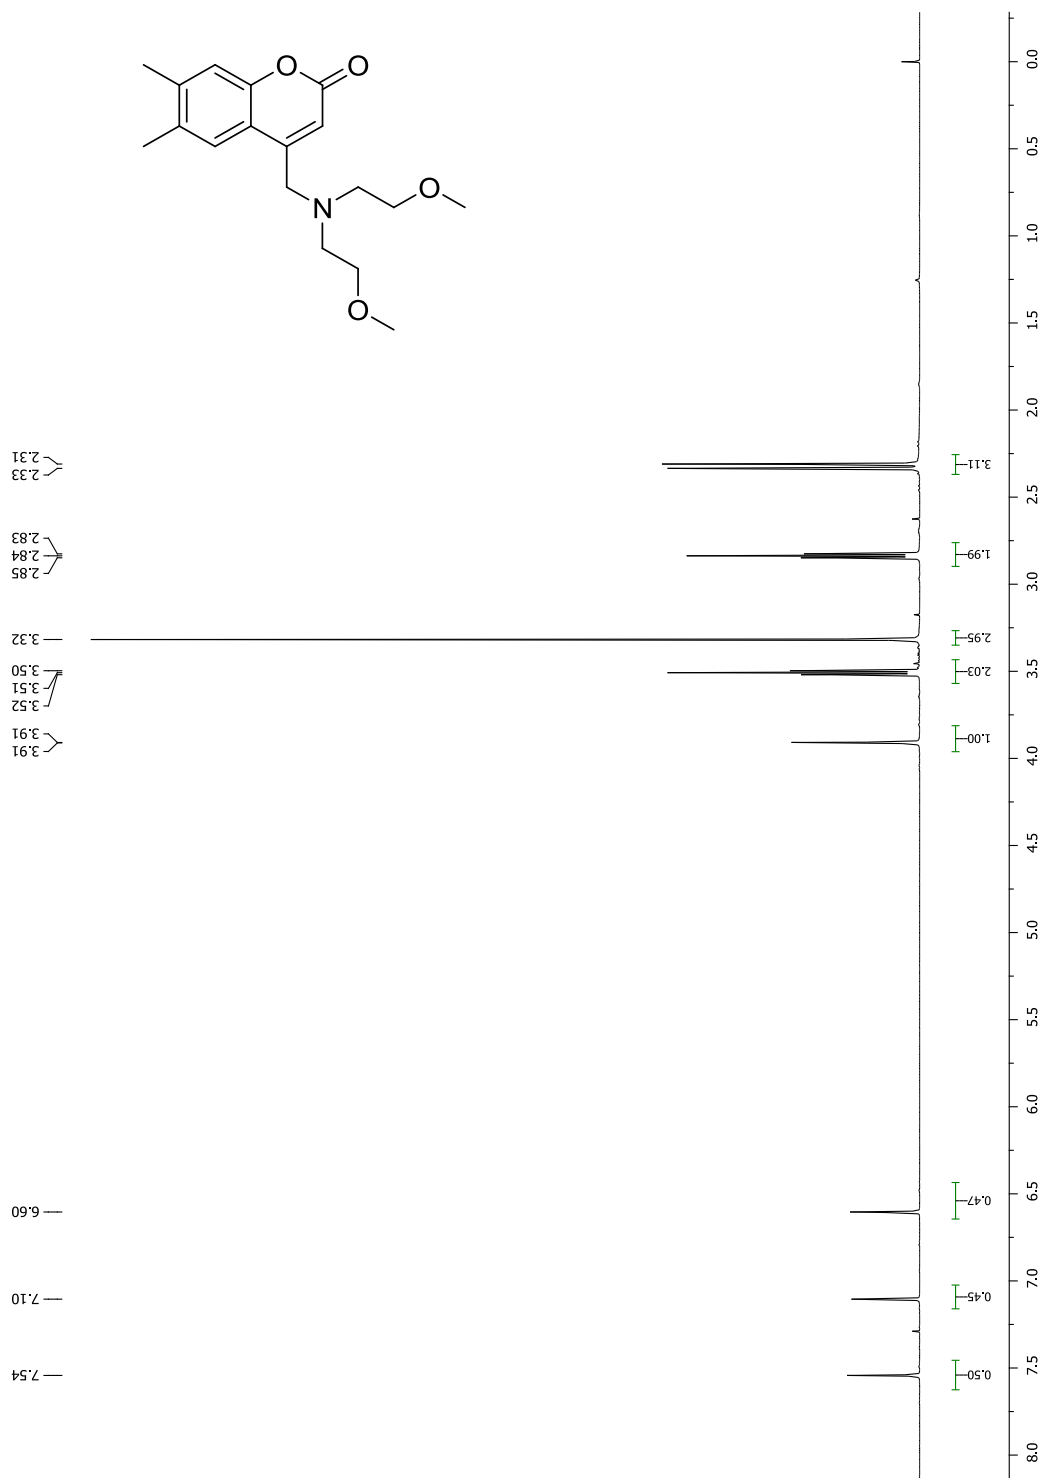

# C6A6

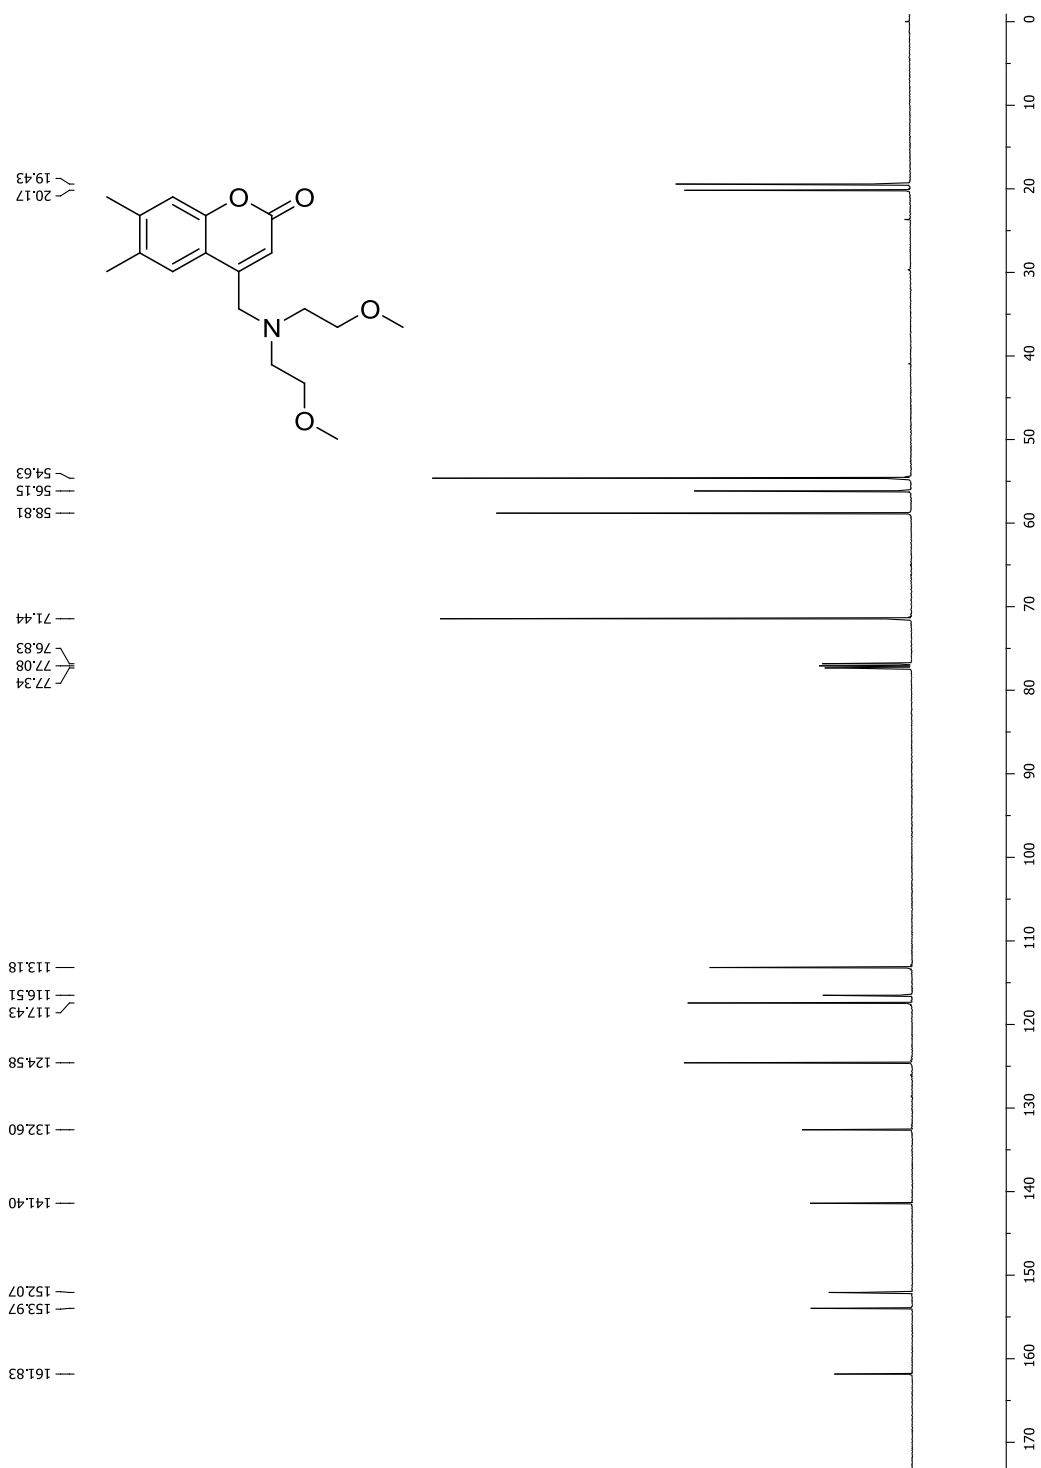

C6A13

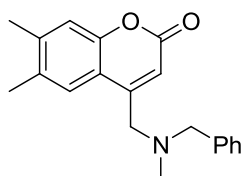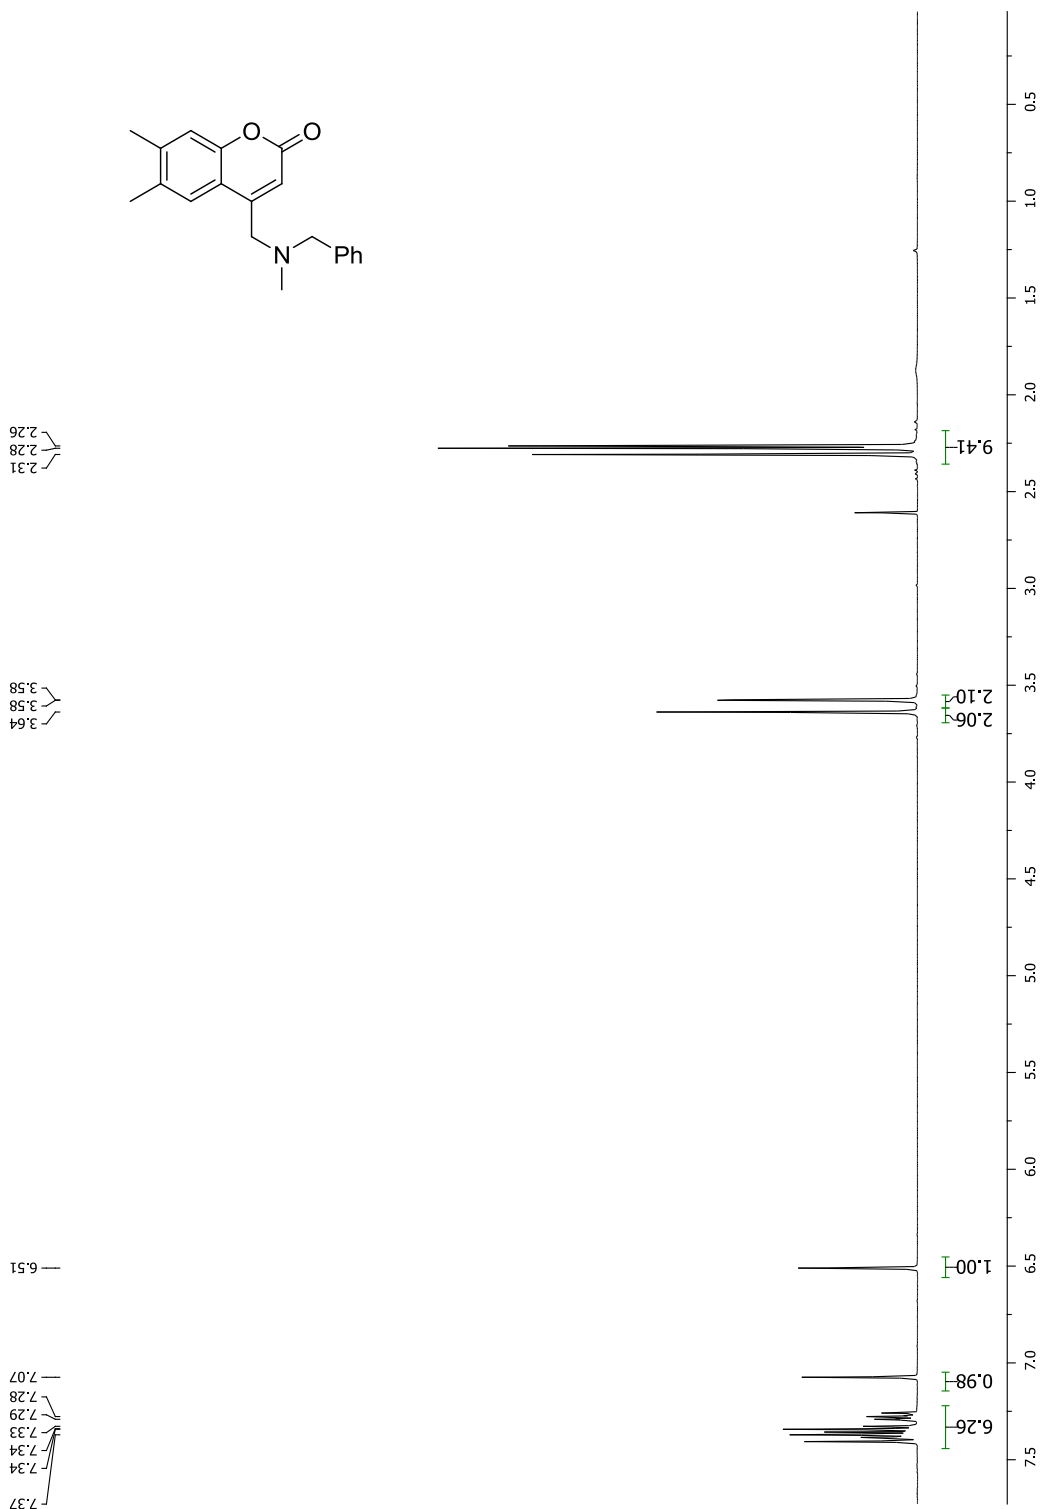



# C6A13

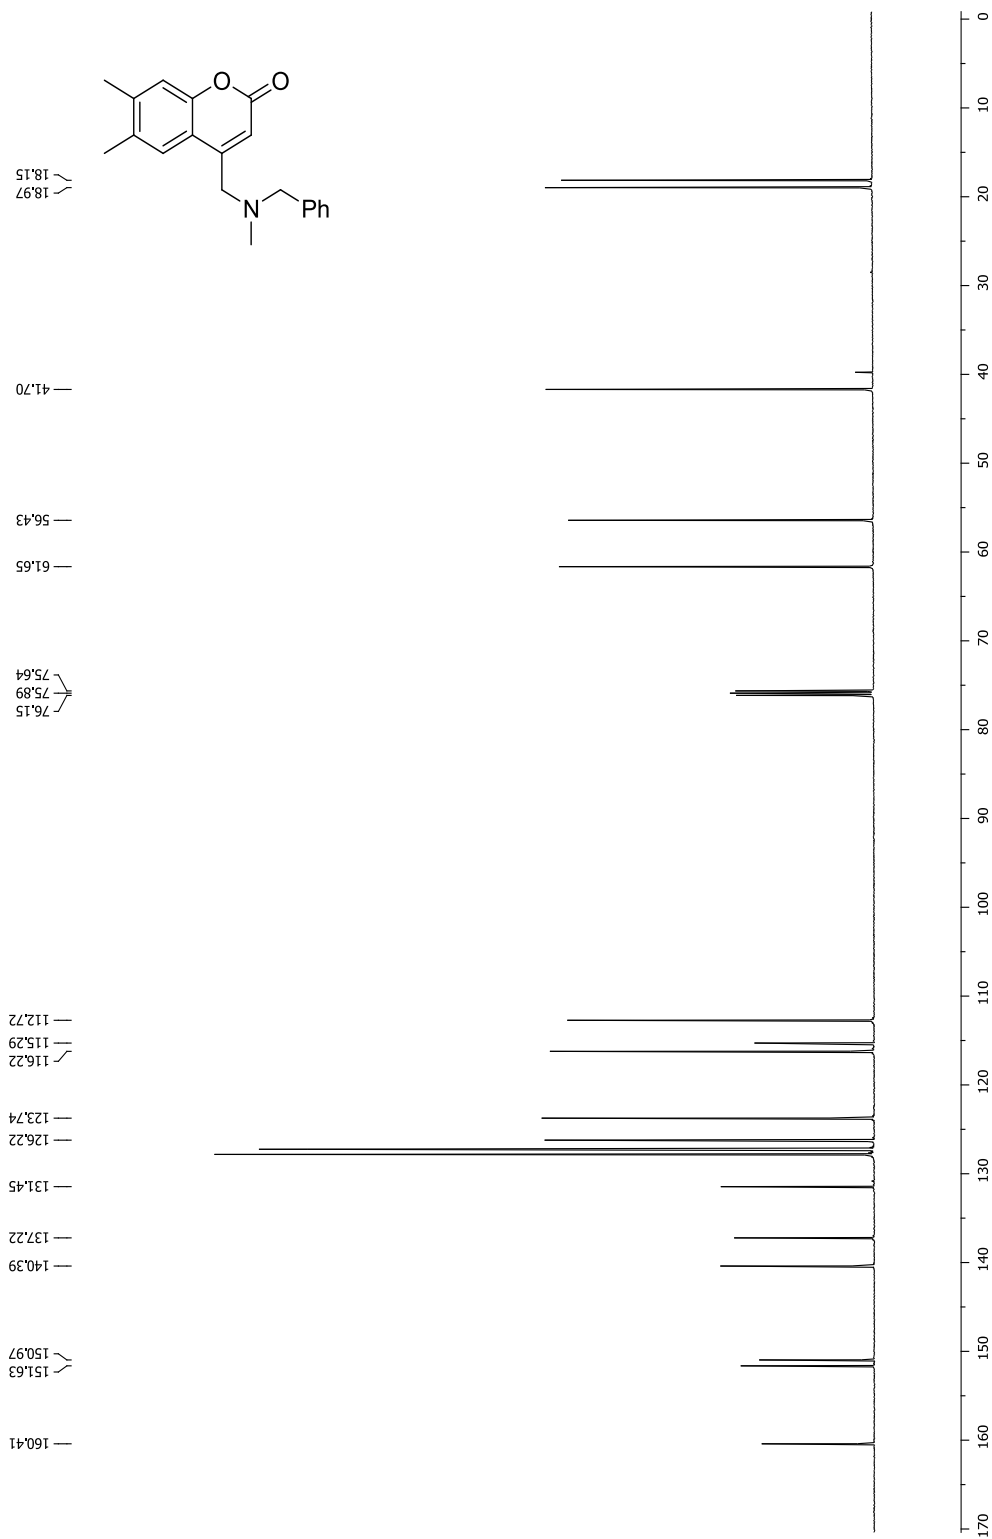

C7A9

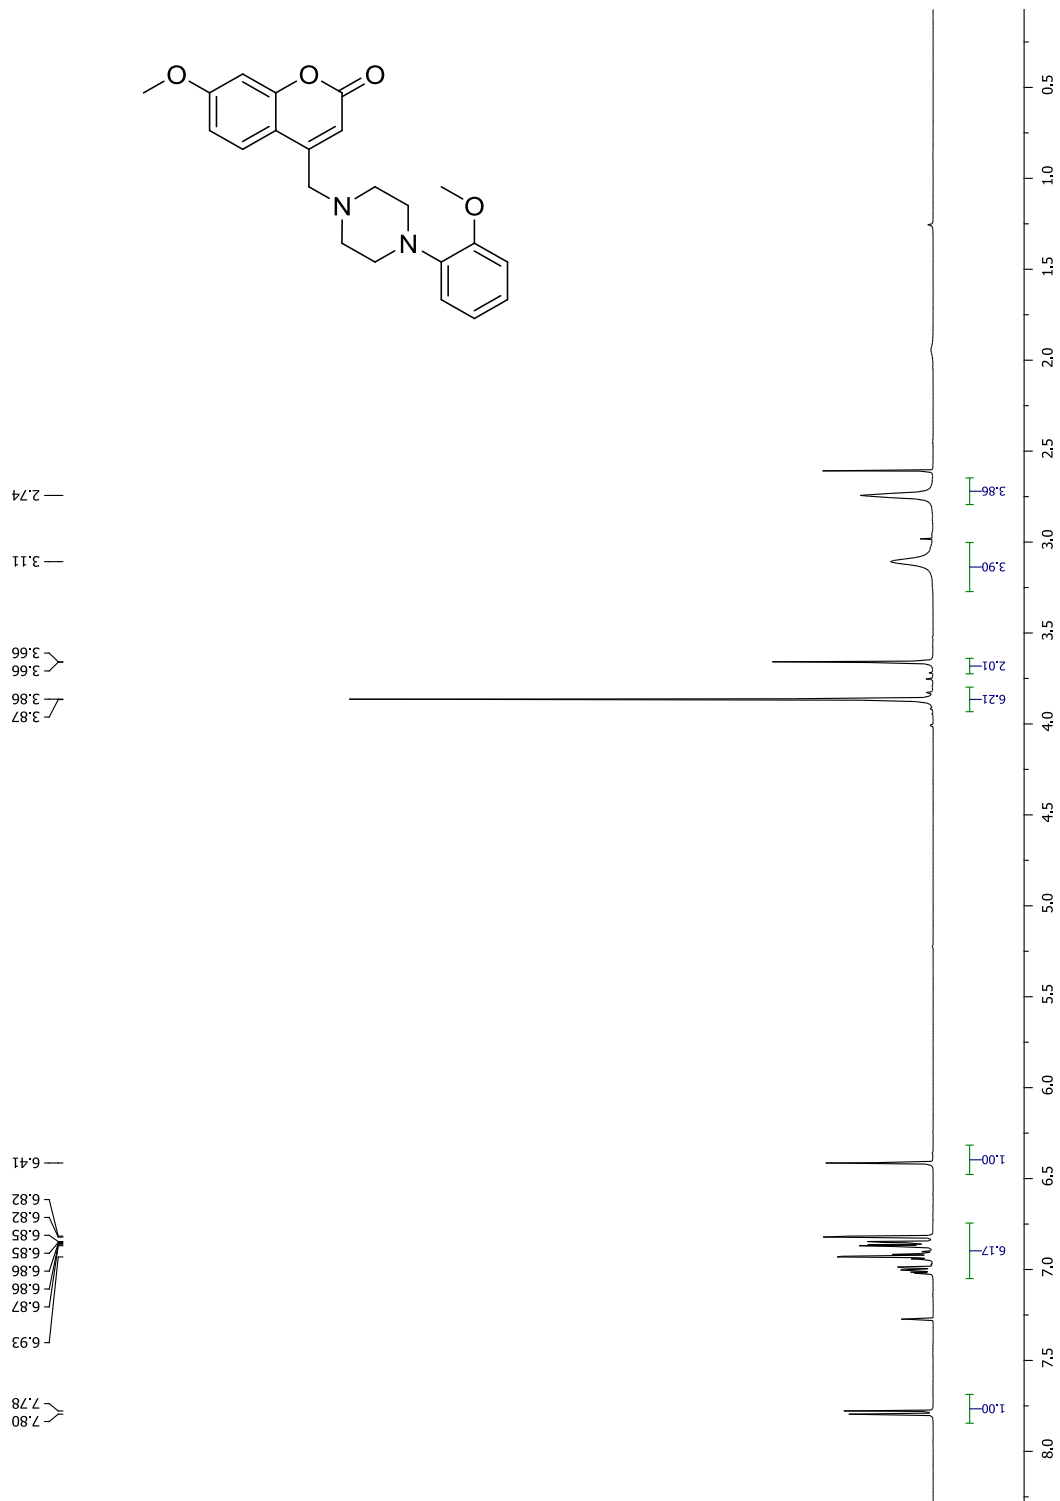

# C7A9

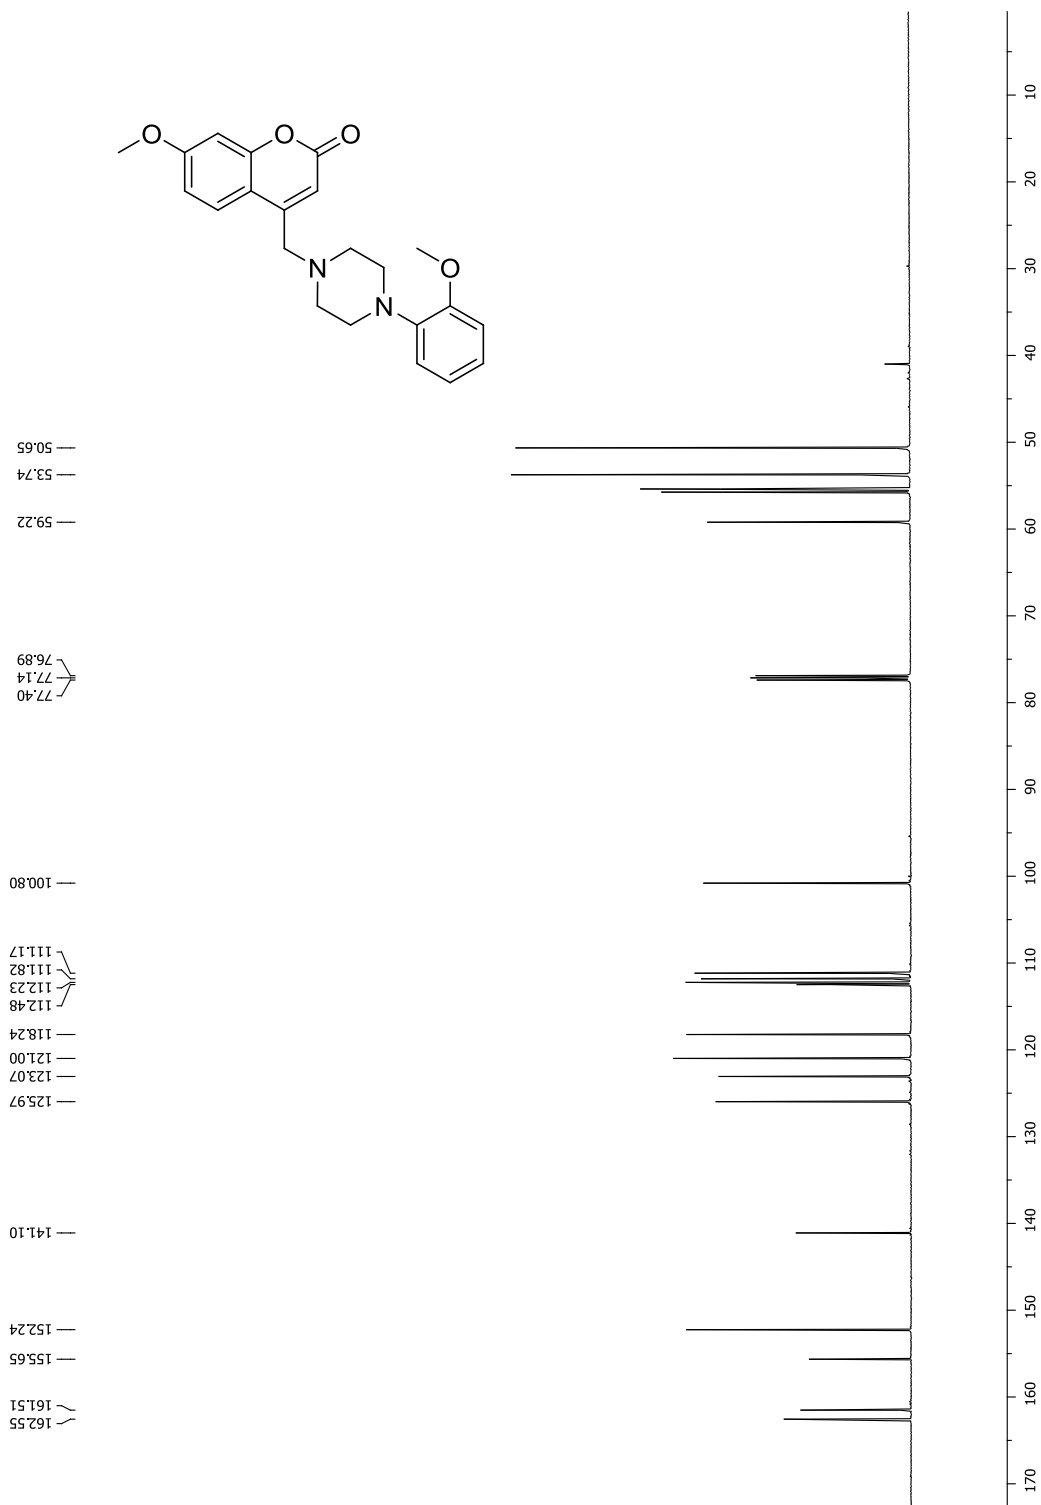

C7A11

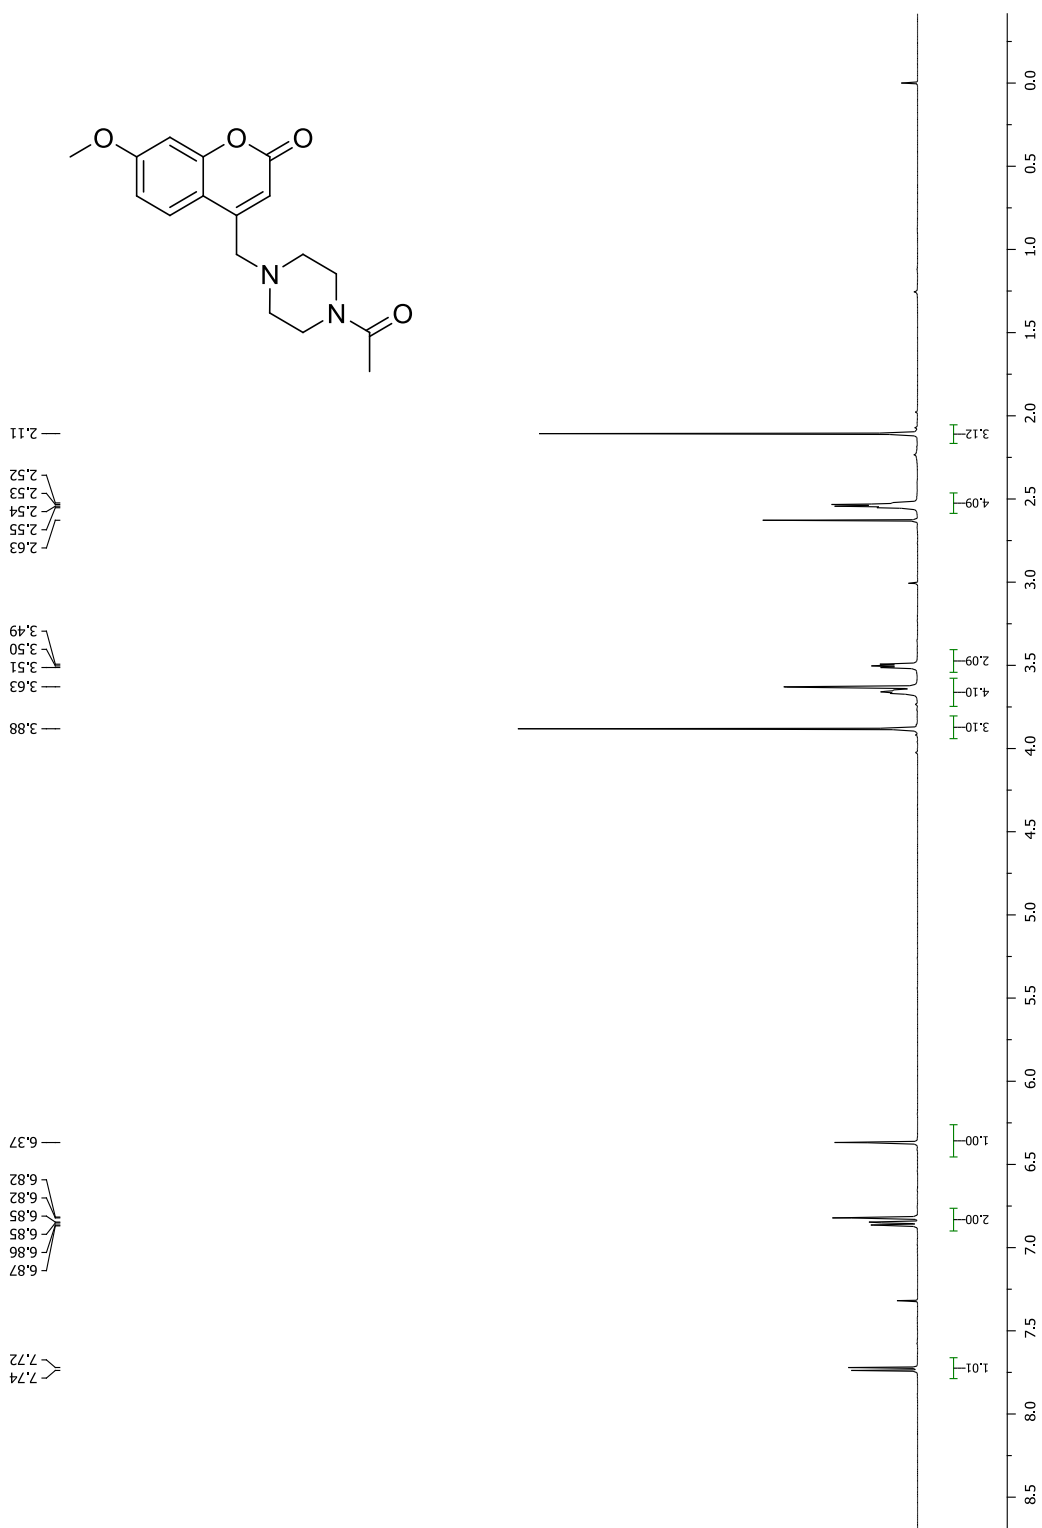

# C7A11

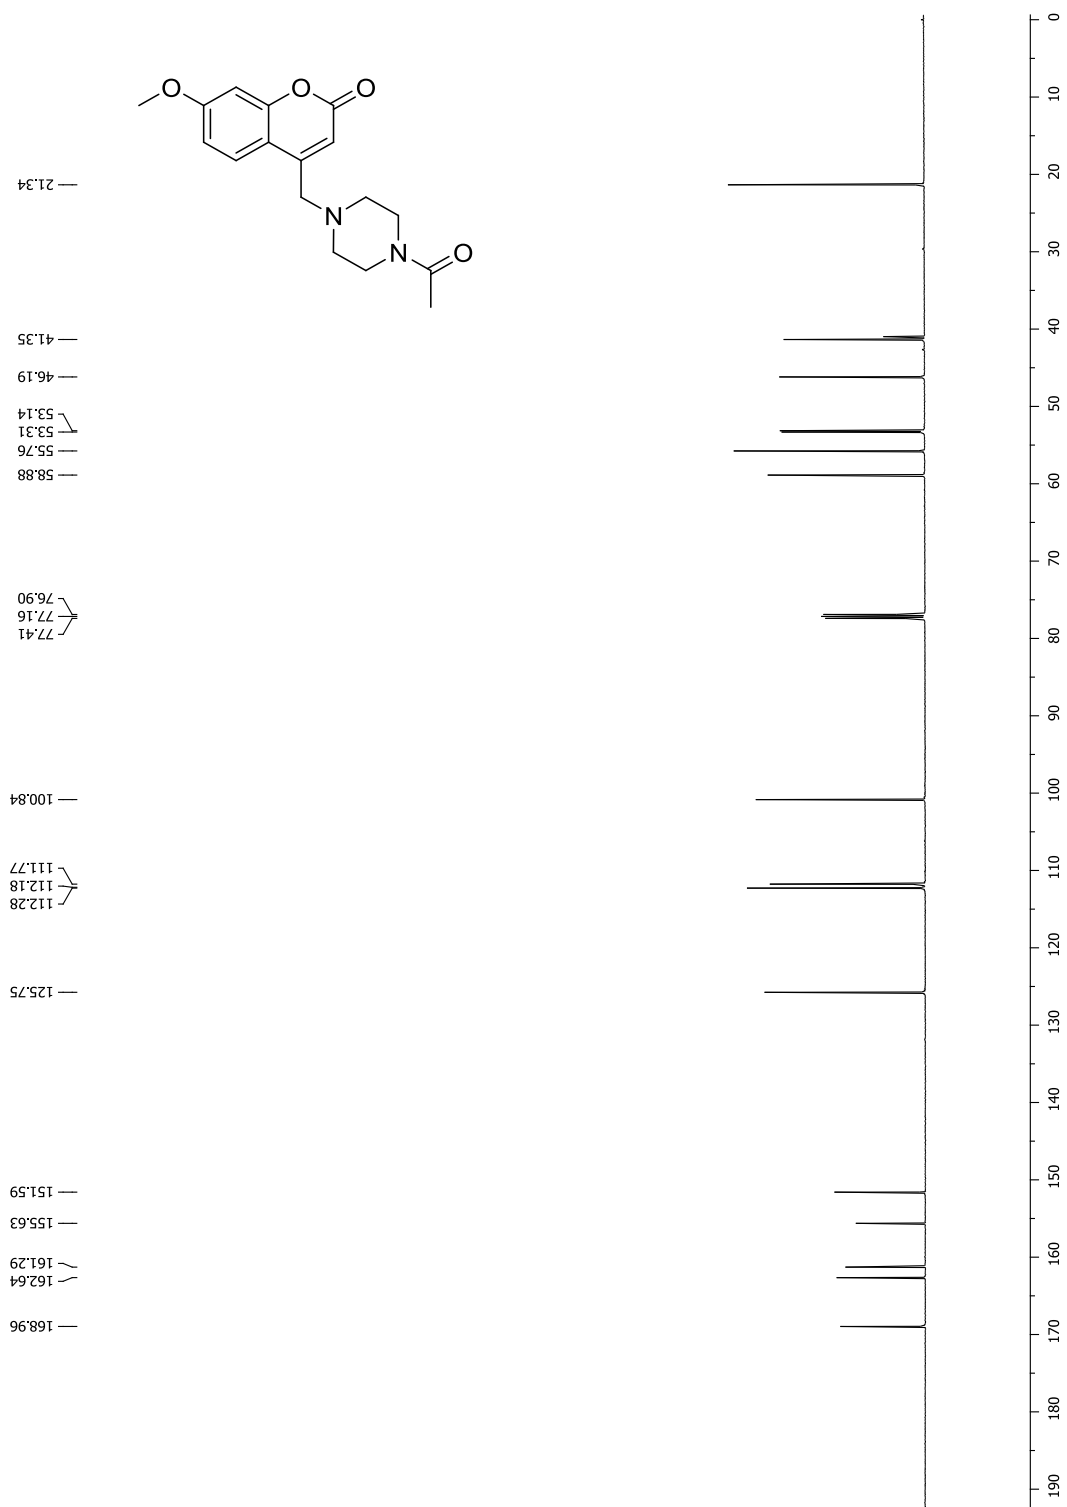

# C7A13

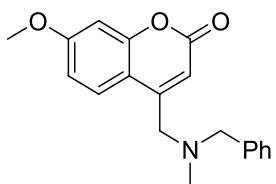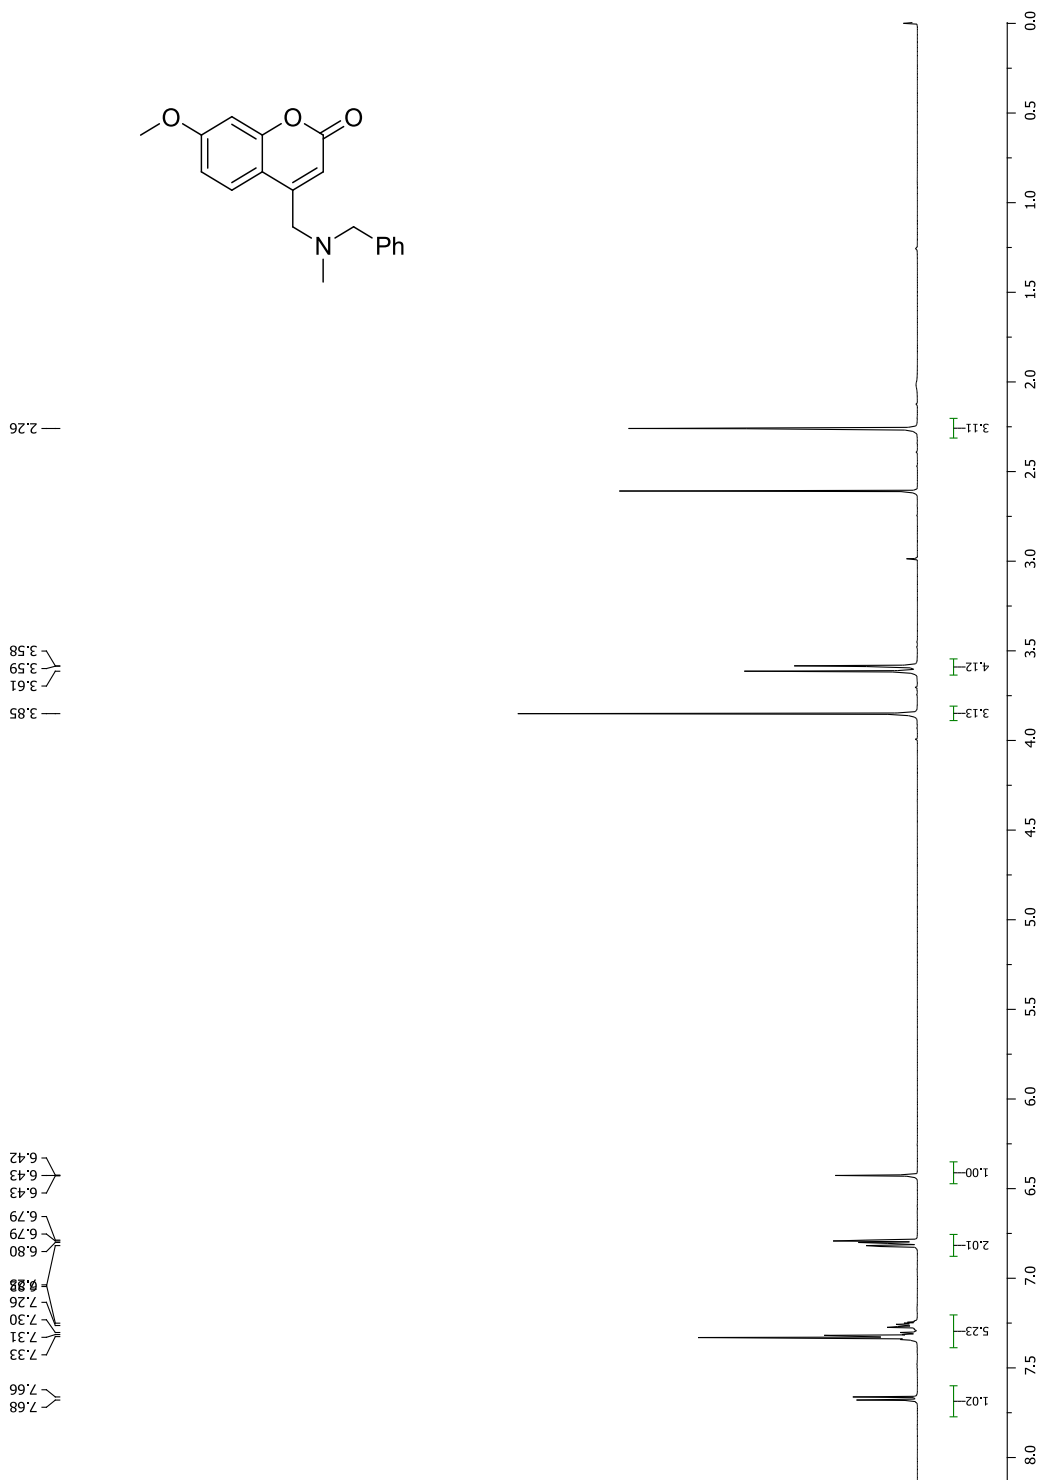

# C7A13

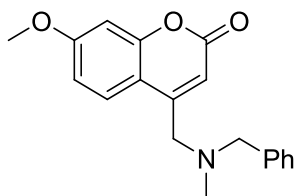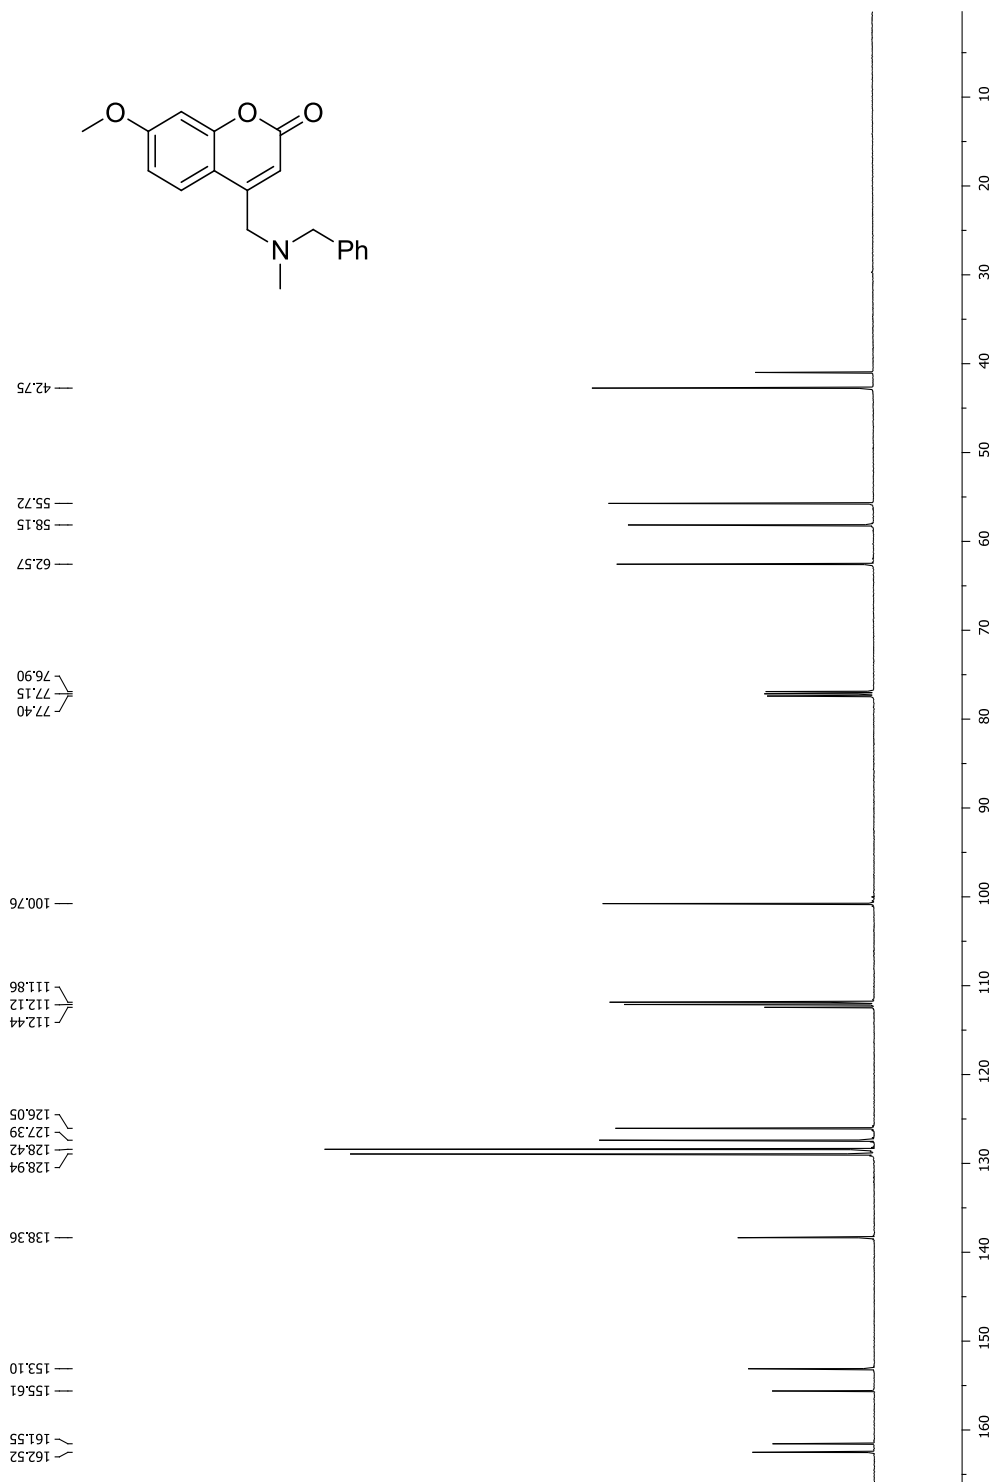

C8A3

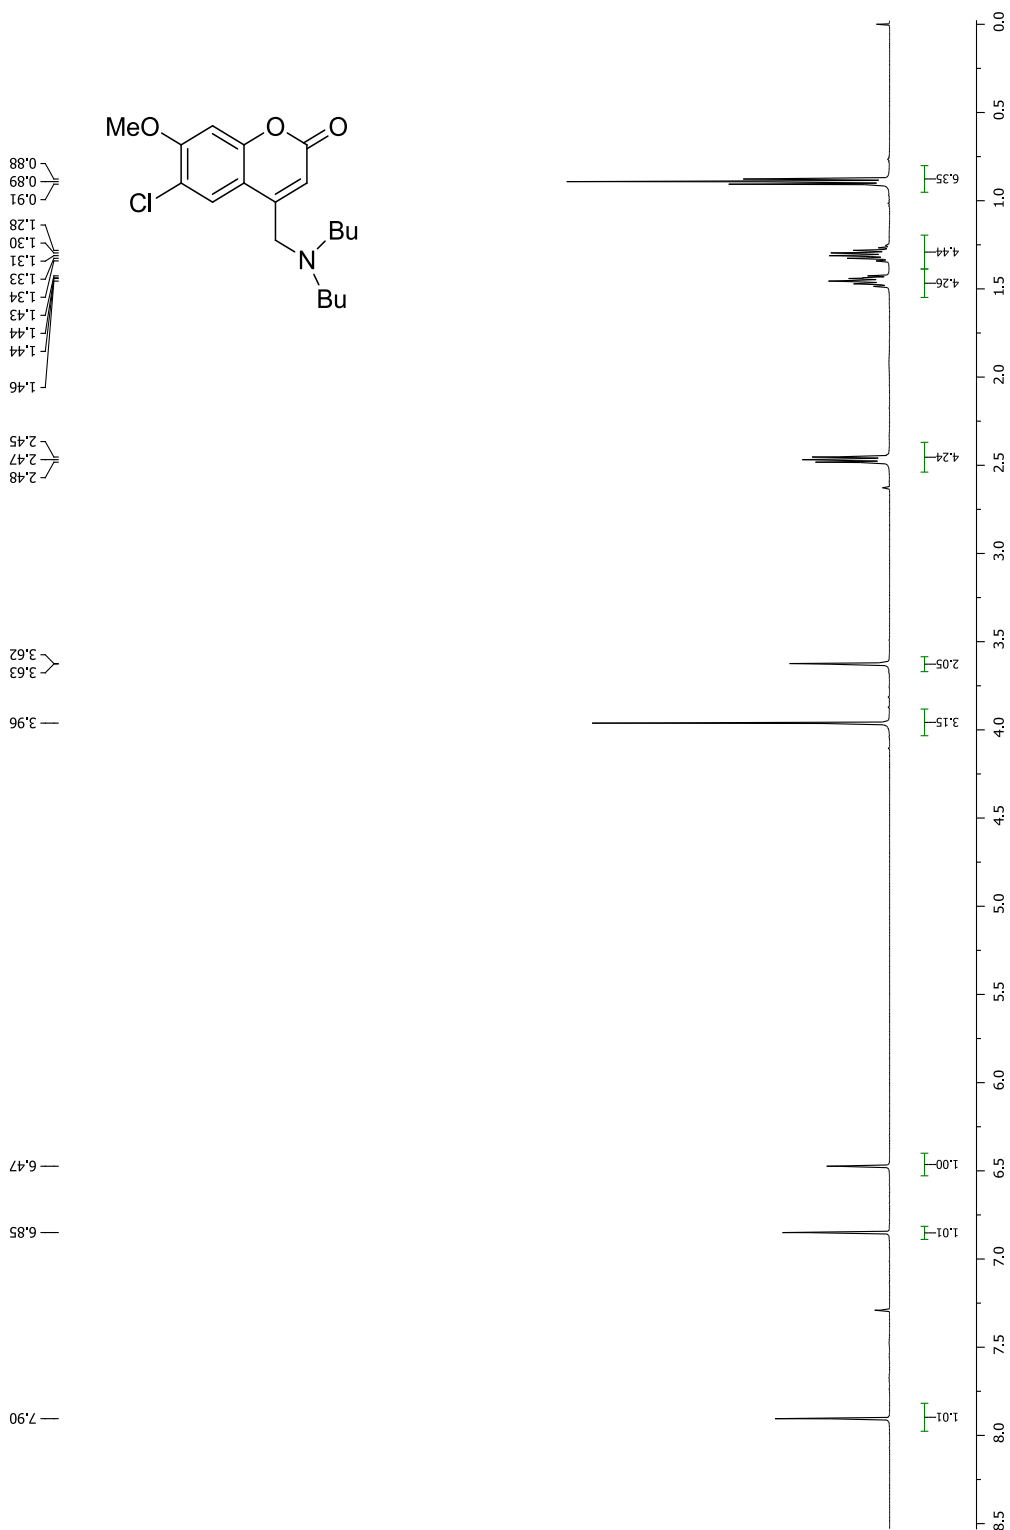



C8A3

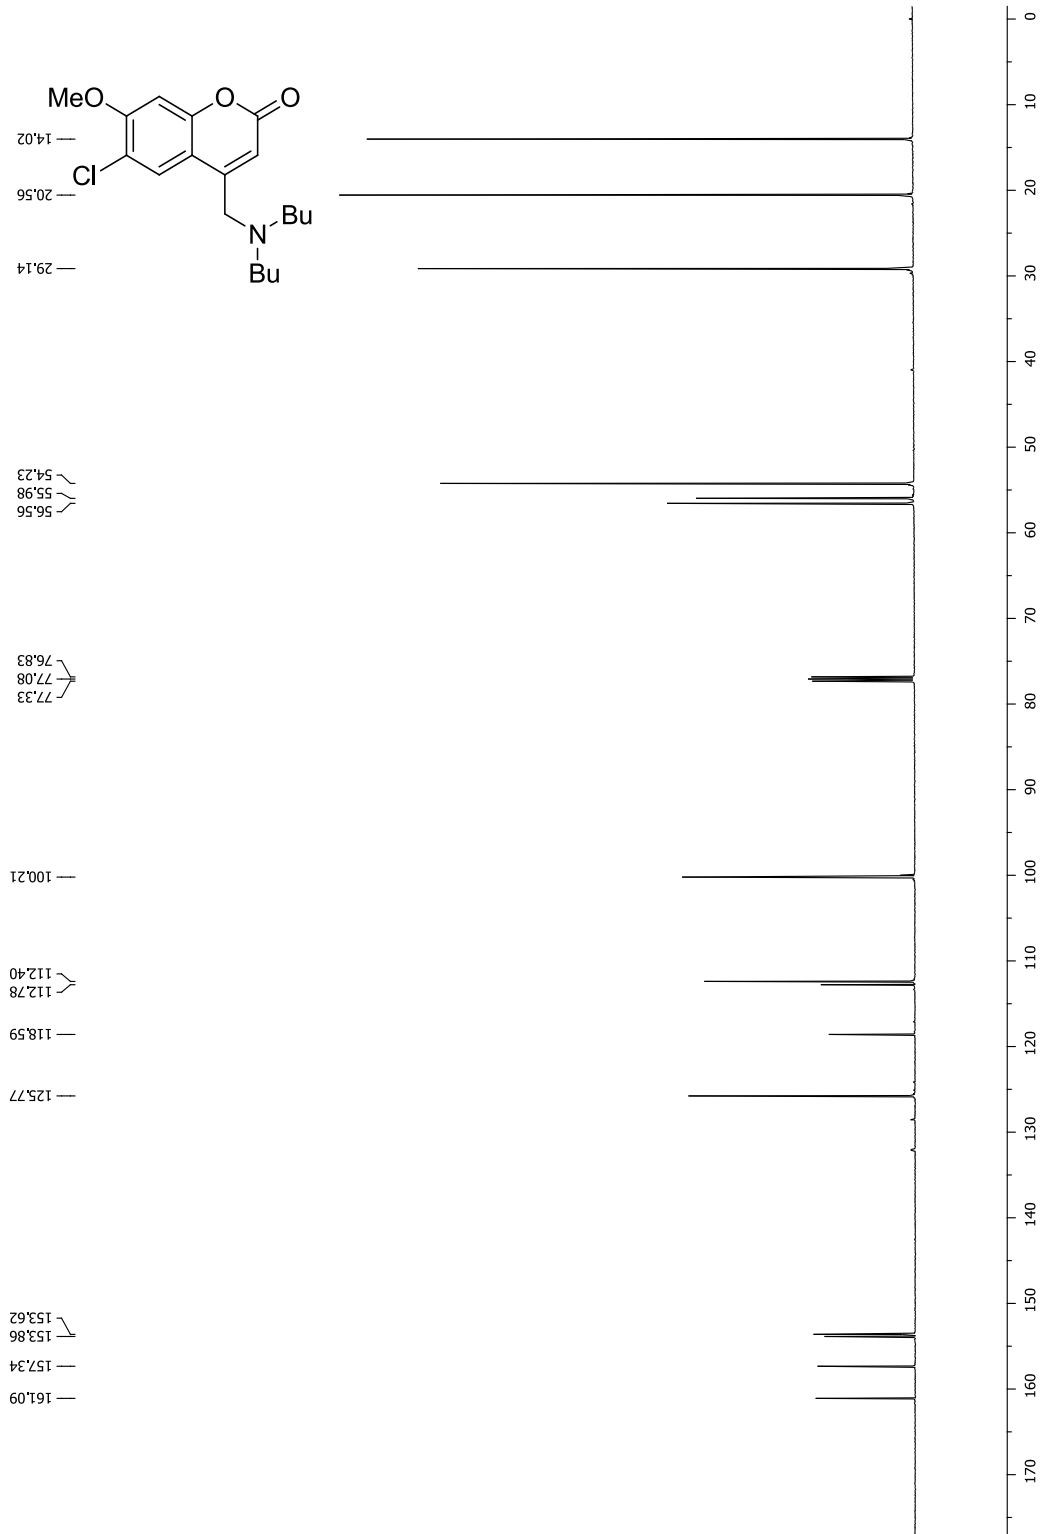

# C8A12

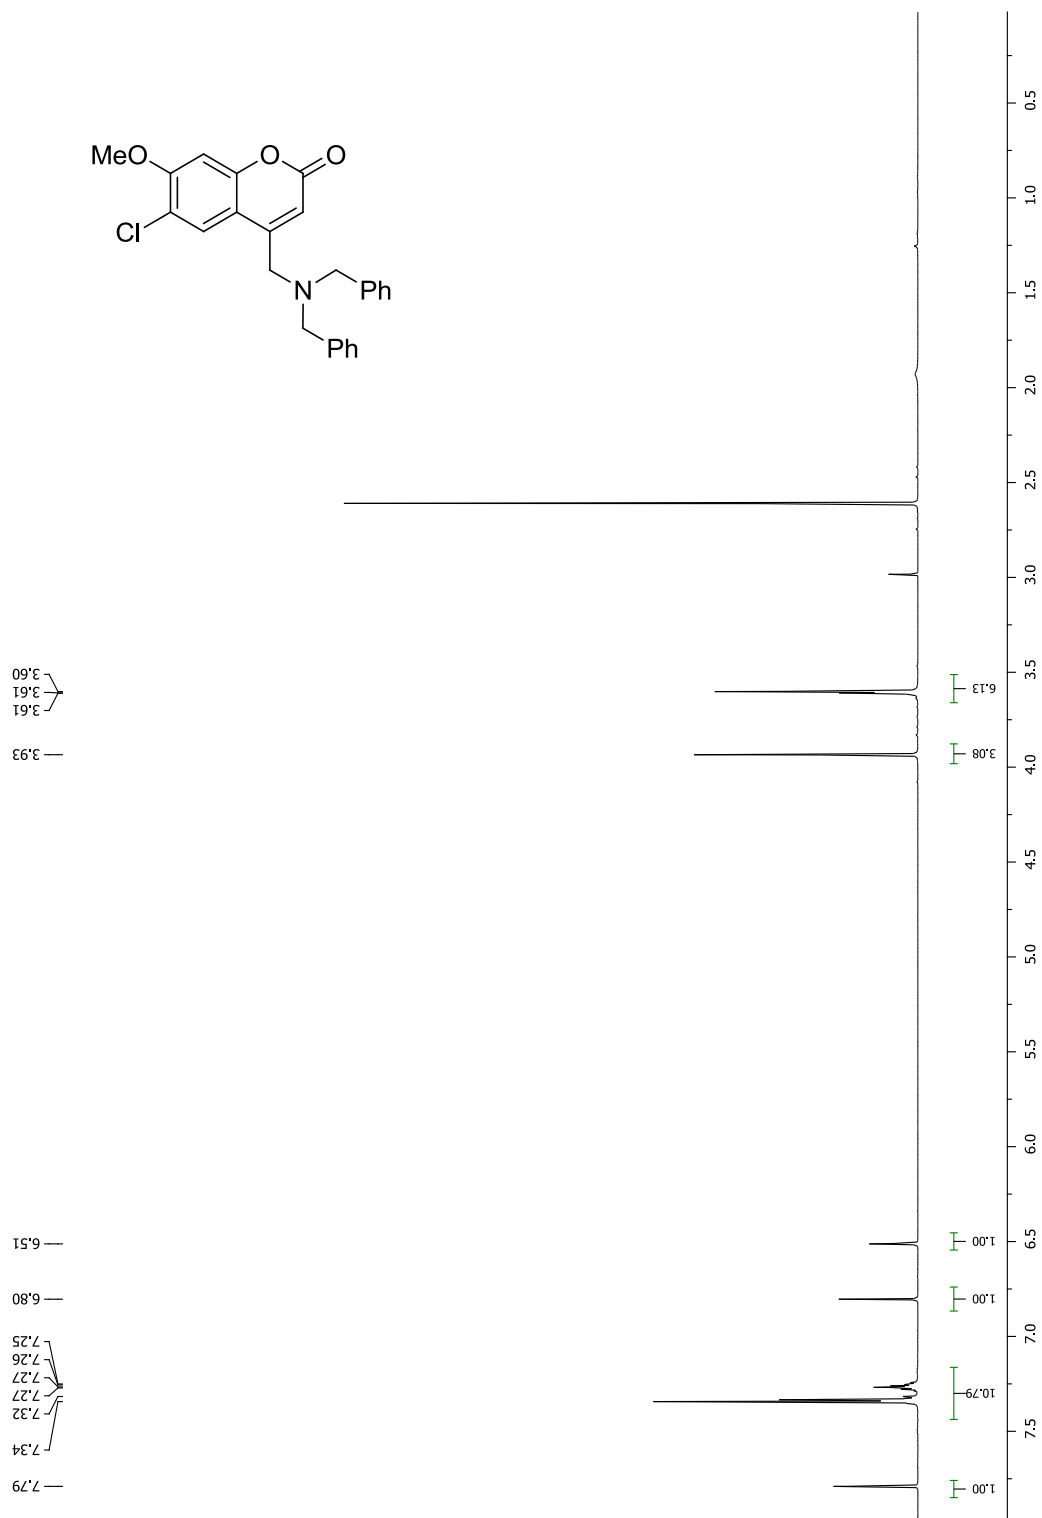

# C8A12

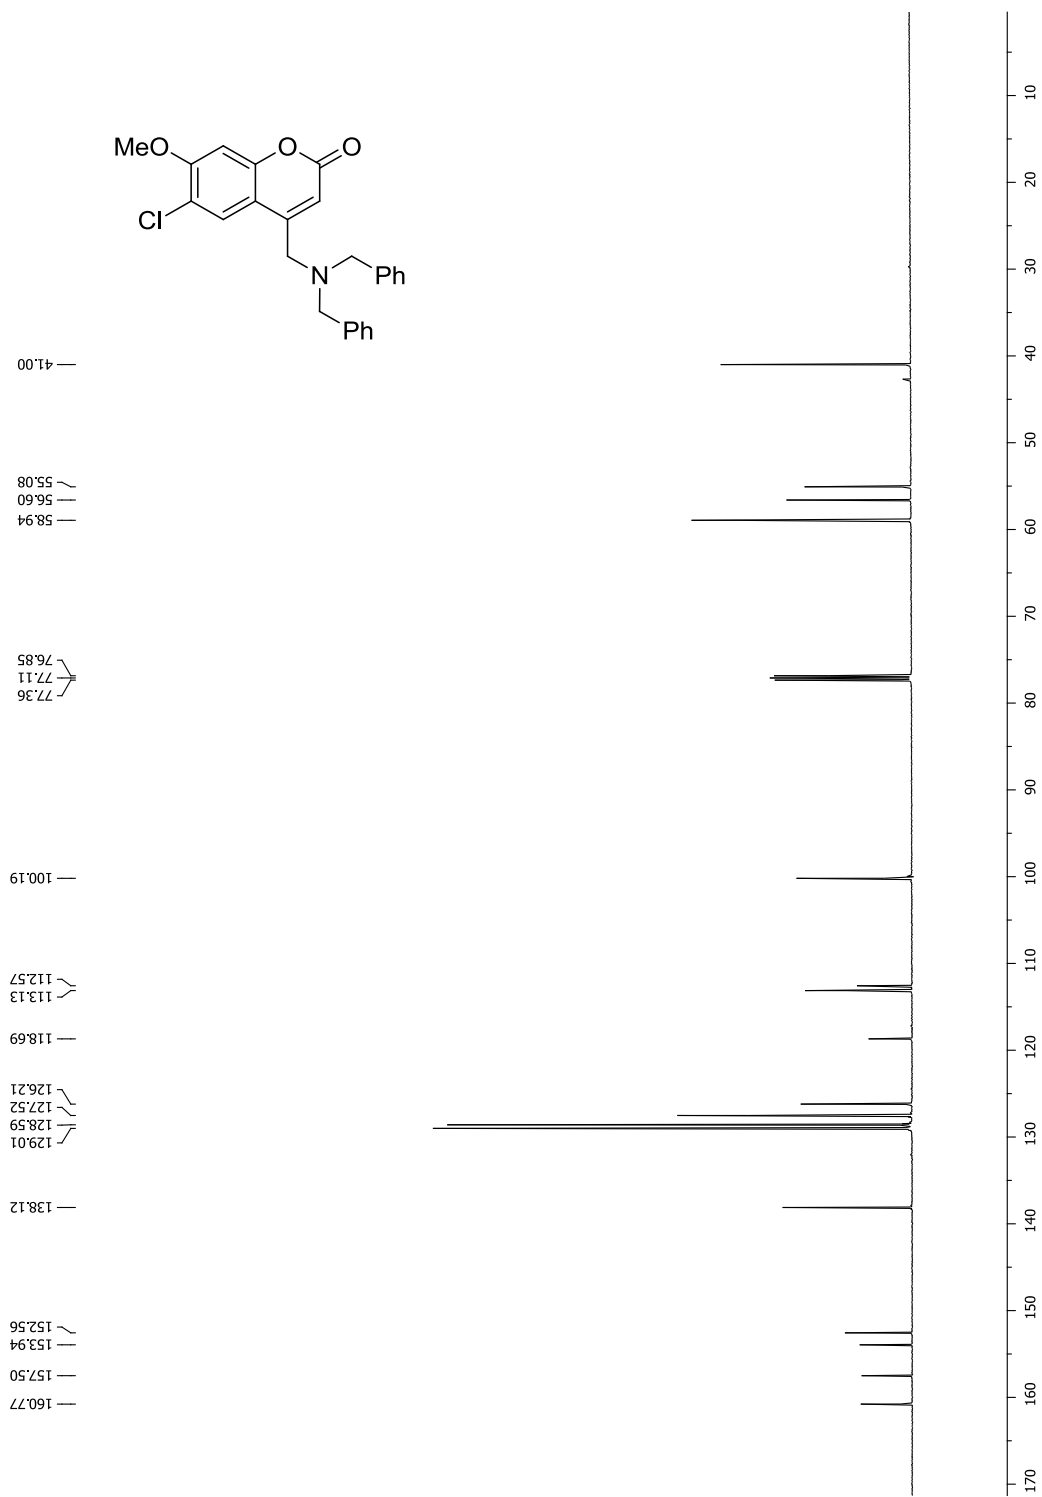

# C8A14

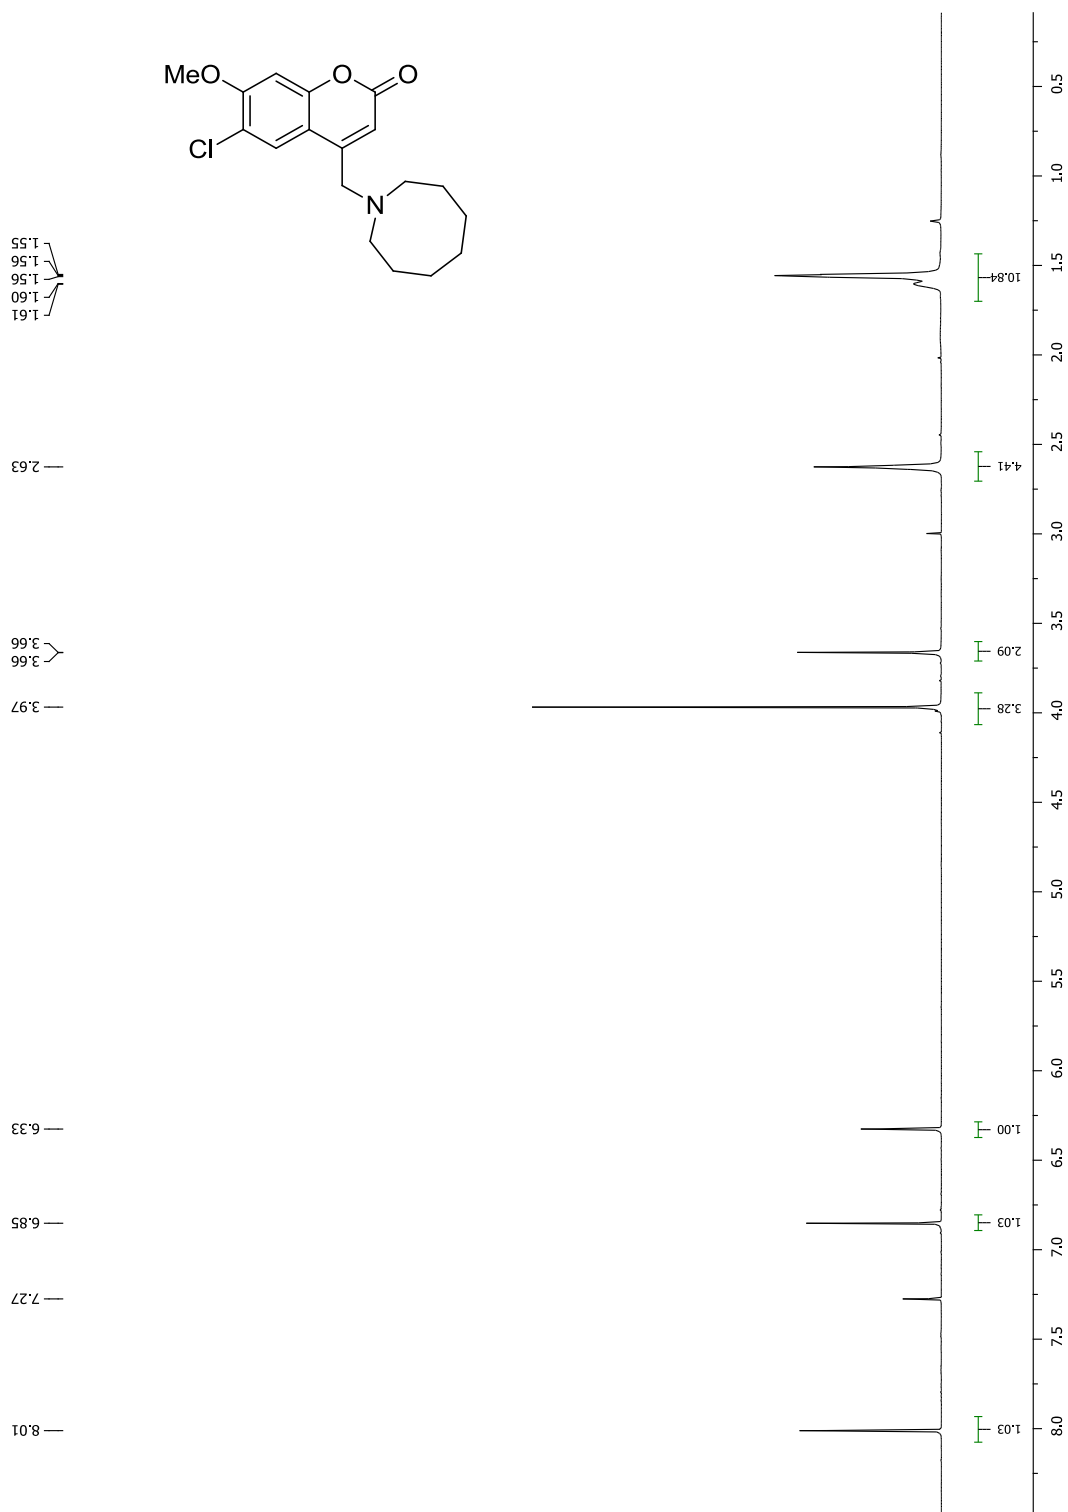

# C8A14

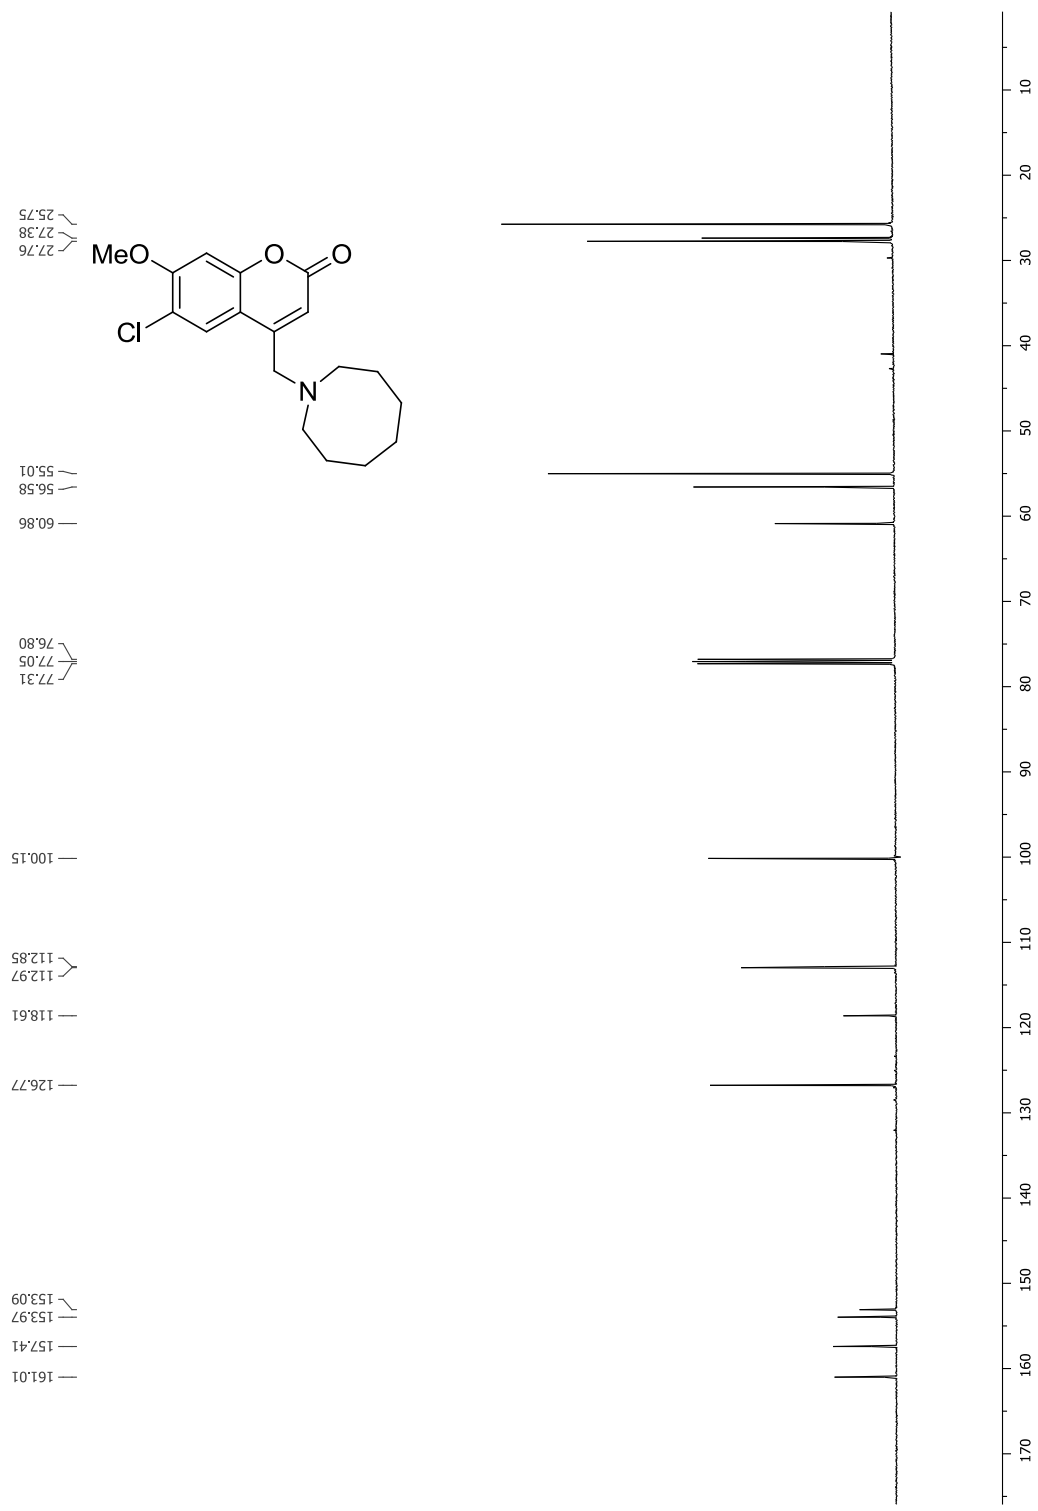

Supplement: Beilstein_J_Org_Chem-08-1200-s001.pdf [file Beilstein_J_Org_Chem-08-1200-s001.pdf]
