# Supplementary material for: Palladium-catalyzed substitution of (coumarinyl)methyl acetates with C-, N-, and S-nucleophiles
Source: PubMed Central journal article supplement (PMC3458738; doi:10.3762/bjoc.8.133), 2012-07-27
Supplement: Beilstein_J_Org_Chem-08-1200-s002.pdf [file Beilstein_J_Org_Chem-08-1200-s002.pdf]

# Supporting Information

for

## **Palladium-catalyzed substitution of (coumarinyl)methyl acetates with C-, N-, and S-nucleophiles**

Kalicharan Chattopadhyay<sup>1,2</sup>, Erik Fenster<sup>2</sup>, Alexander J. Grenning<sup>1</sup> and Jon A. Tunge<sup>1,2\*</sup>

<sup>1</sup>Department of Chemistry, University of Kansas, 1251 Wescoe Hall Drive, Lawrence, KS 66045-7528, USA and

<sup>2</sup>KU Chemical Methodologies and Library Development Center of Excellence, University of Kansas, 1501 Wakarusa  
Drive, Lawrence, Kansas 66047, USA.

Email: Jon A. Tunge - [tunge@ku.edu](mailto:tunge@ku.edu)

*\*Corresponding author*

**Detailed results of the library analysis are likewise included.**

| Compound Lot Number<br>(Notebook Number) | CCT Tube Barcode<br>Number | STRUCTURE                | Molecular<br>Weight | Theoretical<br>yield (mg) | Actual yield<br>(mg) | Actual yield (%) | Purity (%) |
|------------------------------------------|----------------------------|--------------------------|---------------------|---------------------------|----------------------|------------------|------------|
| CMC-50-181-C1A1                          | CCT117707                  | $C_{14}H_{15}NO_3$       | 245,2738            | 85,8                      | 50,7                 | 59               | 100,0      |
| CMC-50-181-C1A10                         | CCT117804                  | $C_{20}H_{18}Cl_2N_2O_2$ | 389,27512           | 136,2                     | 67,9                 | 50               | 98,5       |
| CMC-50-181-C1A11                         | CCT117790                  | $C_{16}H_{18}N_2O_3$     | 286,32572           | 100,2                     | 12,8                 | 13               | 100,0      |
| CMC-50-181-C1A12                         | CCT117708                  | $C_{24}H_{21}NO_2$       | 355,42904           | 124,4                     | 57,0                 | 46               | 99,4       |
| CMC-50-181-C1A13                         | CCT117711                  | $C_{18}H_{17}NO_2$       | 279,33308           | 97,8                      | 55,0                 | 56               | 100,0      |
| CMC-50-181-C1A14                         | CCT117721                  | $C_{17}H_{21}NO_2$       | 271,35414           | 95,0                      | 48,8                 | 51               | 100,0      |
| CMC-50-181-C1A15                         | CCT117799                  | $C_{14}H_{13}NO_2$       | 227,25852           | 79,5                      | 12,2                 | 15               | 0,0        |
| CMC-50-181-C1A16                         | CCT117794                  | $C_{20}H_{20}N_2O_2$     | 320,385             | 112,1                     | 37,9                 | 34               | 100,0      |
| CMC-50-181-C1A2                          | CCT117763                  | $C_{15}H_{17}NO_2$       | 243,30098           | 85,2                      | 45,5                 | 53               | 99,4       |
| CMC-50-181-C1A3                          | CCT117795                  | $C_{18}H_{25}NO_2$       | 287,3966            | 100,6                     | 36,6                 | 36               | 100,0      |
| CMC-50-181-C1A4                          | CCT117801                  | $C_{16}H_{17}NO_2$       | 255,31168           | 89,4                      | 39,3                 | 44               | 100,0      |
| CMC-50-181-C1A5                          | CCT117802                  | $C_{14}H_{15}NO_2$       | 229,2744            | 80,2                      | 32,4                 | 40               | 97,9       |
| CMC-50-181-C1A6                          | CCT117731                  | $C_{16}H_{21}NO_4$       | 291,34224           | 102,0                     | 66,8                 | 66               | 98,9       |
| CMC-50-181-C1A7                          | CCT117768                  | $C_{16}H_{21}NO_2$       | 259,34344           | 90,8                      | 47,6                 | 52               | 100,0      |
| CMC-50-181-C1A8                          | CCT117709                  | $C_{20}H_{19}FN_2O_2$    | 338,3754632         | 118,4                     | 45,8                 | 39               | 98,4       |
| CMC-50-181-C1A9                          | CCT117766                  | $C_{21}H_{22}N_2O_3$     | 350,41098           | 122,6                     | 61,1                 | 50               | 100,0      |
| CMC-50-181-C2A1                          | CCT117786                  | $C_{15}H_{16}ClNO_3$     | 293,74544           | 102,8                     | 20,9                 | 20               | 100,0      |
| CMC-50-181-C2A10                         | CCT117780                  | $C_{21}H_{19}Cl_3N_2O_2$ | 437,74676           | 153,2                     | 25,1                 | 16               | 100,0      |
| CMC-50-181-C2A11                         | CCT117770                  | $C_{17}H_{19}ClN_2O_3$   | 334,79736           | 117,2                     |                      | 0                |            |
| CMC-50-181-C2A12                         | CCT117767                  | $C_{25}H_{22}ClNO_2$     | 403,90068           | 141,4                     | 72,8                 | 51               | 100,0      |
| CMC-50-181-C2A13                         | CCT117765                  | $C_{19}H_{18}ClNO_2$     | 327,80472           | 114,7                     | 80,9                 | 71               | 100,0      |
| CMC-50-181-C2A14                         | CCT117642                  | $C_{18}H_{22}ClNO_2$     | 319,82578           | 111,9                     | 8,6                  | 8                | 100,0      |
| CMC-50-181-C2A15                         | CCT117682                  | $C_{15}H_{14}ClNO_2$     | 275,73016           | 96,5                      | 23,4                 | 24               | 0,0        |
| CMC-50-181-C2A16                         | CCT117774                  | $C_{21}H_{21}ClN_2O_2$   | 368,85664           | 129,1                     | 16,7                 | 13               | 100,0      |
| CMC-50-181-C2A2                          | CCT117749                  | $C_{16}H_{18}ClNO_2$     | 291,77262           | 102,1                     | 41,1                 | 40               | 100,0      |
| CMC-50-181-C2A3                          | CCT117713                  | $C_{19}H_{26}ClNO_2$     | 335,86824           | 117,6                     | 47,5                 | 40               | 100,0      |
| CMC-50-181-C2A4                          | CCT117715                  | $C_{17}H_{18}ClNO_2$     | 303,78332           | 106,3                     | 57,1                 | 54               | 100,0      |
| CMC-50-181-C2A5                          | CCT117791                  | $C_{15}H_{16}ClNO_2$     | 277,74604           | 97,2                      | 27,7                 | 28               | 99,5       |
| CMC-50-181-C2A6                          | CCT117798                  | $C_{17}H_{22}ClNO_4$     | 339,81388           | 118,9                     | 76,3                 | 64               | 99,6       |

|                  |           |                          |             |       |      |    |       |
|------------------|-----------|--------------------------|-------------|-------|------|----|-------|
| CMC-50-181-C2A7  | CCT117727 | $C_{17}H_{22}ClNO_2$     | 307,81508   | 107,7 | 64,0 | 59 | 99,2  |
| CMC-50-181-C2A8  | CCT117800 | $C_{21}H_{20}ClFN_2O_2$  | 386,8471032 | 135,4 | 12,4 | 9  | 100,0 |
| CMC-50-181-C2A9  | CCT117729 | $C_{22}H_{23}ClN_2O_3$   | 398,88262   | 139,6 | 10,0 | 7  | 94,7  |
| CMC-50-181-C3A1  | CCT117698 | $C_{16}H_{19}NO_3$       | 273,32696   | 95,7  | 69,1 | 72 | 97,0  |
| CMC-50-181-C3A10 | CCT117756 | $C_{22}H_{22}Cl_2N_2O_2$ | 417,32828   | 146,1 | 51,6 | 35 | 100,0 |
| CMC-50-181-C3A11 | CCT117710 | $C_{18}H_{22}N_2O_3$     | 314,37888   | 110,0 | 55,6 | 51 | 99,4  |
| CMC-50-181-C3A12 | CCT117764 | $C_{26}H_{25}NO_2$       | 383,4822    | 134,2 | 70,5 | 53 | 99,7  |
| CMC-50-181-C3A13 | CCT117796 | $C_{20}H_{21}NO_2$       | 307,38624   | 107,6 | 65,6 | 61 | 100,0 |
| CMC-50-181-C3A14 | CCT117778 | $C_{19}H_{25}NO_2$       | 299,4073    | 104,8 | 18,9 | 18 | 100,0 |
| CMC-50-181-C3A15 | CCT117606 | $C_{16}H_{17}NO_2$       | 255,31168   | 89,4  | 20,3 | 23 | 0,0   |
| CMC-50-181-C3A16 | CCT117788 | $C_{22}H_{24}N_2O_2$     | 348,43816   | 122,0 | 41,0 | 34 | 100,0 |
| CMC-50-181-C3A2  | CCT117762 | $C_{17}H_{21}NO_2$       | 271,35414   | 95,0  | 32,1 | 34 | 99,6  |
| CMC-50-181-C3A3  | CCT117784 | $C_{20}H_{29}NO_2$       | 315,44976   | 110,4 | 61,0 | 55 | 99,7  |
| CMC-50-181-C3A4  | CCT117639 | $C_{18}H_{21}NO_2$       | 283,36484   | 99,2  | 47,0 | 47 | 99,5  |
| CMC-50-181-C3A5  | CCT117678 | $C_{16}H_{19}NO_2$       | 257,32756   | 90,1  | 43,1 | 48 | 99,6  |
| CMC-50-181-C3A6  | CCT117776 | $C_{18}H_{25}NO_4$       | 319,3954    | 111,8 | 63,7 | 57 | 99,2  |
| CMC-50-181-C3A7  | CCT117792 | $C_{18}H_{25}NO_2$       | 287,3966    | 100,6 | 59,1 | 59 | 100,0 |
| CMC-50-181-C3A8  | CCT117772 | $C_{22}H_{23}FN_2O_2$    | 366,4286232 | 128,3 | 17,0 | 13 | 100,0 |
| CMC-50-181-C3A9  | CCT117782 | $C_{23}H_{26}N_2O_3$     | 378,46414   | 132,5 | 25,2 | 19 | 96,5  |
| CMC-50-181-C4A1  | CCT117805 | $C_{18}H_{17}NO_3$       | 295,33248   | 103,4 | 40,5 | 39 | 97,9  |
| CMC-50-181-C4A10 | CCT117381 | $C_{24}H_{20}Cl_2N_2O_2$ | 439,3338    | 153,8 | 40,9 | 27 | 99,8  |
| CMC-50-181-C4A11 | CCT117806 | $C_{20}H_{20}N_2O_3$     | 336,3844    | 117,7 | 31,7 | 27 | 100,0 |
| CMC-50-181-C4A12 | CCT117797 | $C_{28}H_{23}NO_2$       | 405,48772   | 141,9 | 27,5 | 19 | 98,8  |
| CMC-50-181-C4A13 | CCT117803 | $C_{22}H_{19}NO_2$       | 329,39176   | 115,3 | 46,7 | 41 | 99,1  |
| CMC-50-181-C4A14 | CCT117693 | $C_{21}H_{23}NO_2$       | 321,41282   | 112,5 | 39,3 | 35 | 100,0 |
| CMC-50-181-C4A15 | CCT117668 | $C_{18}H_{15}NO_2$       | 277,3172    | 97,1  |      | 0  |       |
| CMC-50-181-C4A16 | CCT117573 | $C_{24}H_{22}N_2O_2$     | 370,44368   | 129,7 | 39,1 | 30 | 99,7  |
| CMC-50-181-C4A2  | CCT117716 | $C_{19}H_{19}NO_2$       | 293,35966   | 102,7 | 40,8 | 40 | 100,0 |
| CMC-50-181-C4A3  | CCT117701 | $C_{22}H_{27}NO_2$       | 337,45528   | 118,1 | 49,3 | 42 | 100,0 |
| CMC-50-181-C4A4  | CCT117396 | $C_{20}H_{19}NO_2$       | 305,37036   | 106,9 | 28,7 | 27 | 100,0 |
| CMC-50-181-C4A5  | CCT117697 | $C_{18}H_{17}NO_2$       | 279,33308   | 97,8  | 26,7 | 27 | 100,0 |

|                  |           |                          |             |       |      |    |       |
|------------------|-----------|--------------------------|-------------|-------|------|----|-------|
| CMC-50-181-C4A6  | CCT117347 | $C_{20}H_{23}NO_4$       | 341,40092   | 119,5 | 39,9 | 33 | 99,7  |
| CMC-50-181-C4A7  | CCT117793 | $C_{20}H_{23}NO_2$       | 309,40212   | 108,3 | 43,3 | 40 | 100,0 |
| CMC-50-181-C4A8  | CCT117789 | $C_{24}H_{21}FN_2O_2$    | 388,4341432 | 136,0 | 43,6 | 32 | 99,3  |
| CMC-50-181-C4A9  | CCT117714 | $C_{25}H_{24}N_2O_3$     | 400,46966   | 140,2 | 66,6 | 48 | 75,8  |
| CMC-50-189-C5A1  | CCT117310 | $C_{15}H_{17}NO_3$       | 259,30038   | 90,8  |      | 0  |       |
| CMC-50-189-C5A10 | CCT117357 | $C_{21}H_{20}Cl_2N_2O_2$ | 403,3017    | 141,2 | 47,1 | 33 | 99,0  |
| CMC-50-189-C5A11 | CCT117330 | $C_{17}H_{20}N_2O_3$     | 300,3523    | 105,1 | 47,9 | 46 | 99,5  |
| CMC-50-189-C5A12 | CCT117316 | $C_{25}H_{23}NO_2$       | 369,45562   | 129,3 | 55,7 | 43 | 98,1  |
| CMC-50-189-C5A13 | CCT117359 | $C_{19}H_{19}NO_2$       | 293,35966   | 102,7 | 55,2 | 54 | 99,5  |
| CMC-50-189-C5A14 | CCT117383 | $C_{18}H_{23}NO_2$       | 285,38072   | 99,9  |      | 0  |       |
| CMC-50-189-C5A15 | CCT117371 | $C_{15}H_{15}NO_2$       | 241,2851    | 84,4  |      | 0  |       |
| CMC-50-189-C5A16 | CCT117344 | $C_{21}H_{22}N_2O_2$     | 334,41158   | 117,0 | 15,7 | 13 | 96,2  |
| CMC-50-189-C5A2  | CCT117309 | $C_{16}H_{19}NO_2$       | 257,32756   | 90,1  |      | 0  |       |
| CMC-50-189-C5A3  | CCT117370 | $C_{19}H_{27}NO_2$       | 301,42318   | 105,5 |      | 0  |       |
| CMC-50-189-C5A4  | CCT117377 | $C_{17}H_{19}NO_2$       | 269,33826   | 94,3  | 36,7 | 39 | 96,4  |
| CMC-50-189-C5A5  | CCT117362 | $C_{15}H_{17}NO_2$       | 243,30098   | 85,2  | 25,6 | 30 | 85,4  |
| CMC-50-189-C5A6  | CCT117326 | $C_{17}H_{23}NO_4$       | 305,36882   | 106,9 | 38,9 | 36 | 97,2  |
| CMC-50-189-C5A7  | CCT117335 | $C_{17}H_{23}NO_2$       | 273,37002   | 95,7  | 50,8 | 53 | 98,6  |
| CMC-50-189-C5A8  | CCT117375 | $C_{21}H_{21}FN_2O_2$    | 352,4020432 | 123,3 | 17,5 | 14 | 97,4  |
| CMC-50-189-C5A9  | CCT117345 | $C_{22}H_{24}N_2O_3$     | 364,43756   | 127,6 | 48,3 | 38 | 99,8  |
| CMC-50-189-C6A1  | CCT117358 | $C_{16}H_{19}NO_3$       | 273,32696   | 95,7  | 10,8 | 11 | 97,6  |
| CMC-50-189-C6A10 | CCT116835 | $C_{22}H_{22}Cl_2N_2O_2$ | 417,32828   | 146,1 |      | 0  |       |
| CMC-50-189-C6A11 | CCT117394 | $C_{18}H_{22}N_2O_3$     | 314,37888   | 110,0 | 13,2 | 12 | 97,5  |
| CMC-50-189-C6A12 | CCT117349 | $C_{26}H_{25}NO_2$       | 383,4822    | 134,2 |      | 0  |       |
| CMC-50-189-C6A13 | CCT117092 | $C_{20}H_{21}NO_2$       | 307,38624   | 107,6 | 52,2 | 49 | 99,8  |
| CMC-50-189-C6A14 | CCT117386 | $C_{19}H_{25}NO_2$       | 299,4073    | 104,8 |      | 0  |       |
| CMC-50-189-C6A15 | CCT117392 | $C_{16}H_{17}NO_2$       | 255,31168   | 89,4  | 2,1  | 2  | 56,3  |
| CMC-50-189-C6A16 | CCT117368 | $C_{22}H_{24}N_2O_2$     | 348,43816   | 122,0 | 1,5  | 1  | 92,6  |
| CMC-50-189-C6A2  | CCT117314 | $C_{17}H_{21}NO_2$       | 271,35414   | 95,0  | 8,4  | 9  | 94,2  |
| CMC-50-189-C6A3  | CCT117382 | $C_{20}H_{29}NO_2$       | 315,44976   | 110,4 |      | 0  |       |
| CMC-50-189-C6A4  | CCT117364 | $C_{18}H_{21}NO_2$       | 283,36484   | 99,2  | 53,3 | 54 | 96,3  |

|                  |           |                          |             |       |      |    |       |
|------------------|-----------|--------------------------|-------------|-------|------|----|-------|
| CMC-50-189-C6A5  | CCT117380 | $C_{16}H_{19}NO_2$       | 257,32756   | 90,1  | 21,6 | 24 | 94,0  |
| CMC-50-189-C6A6  | CCT117366 | $C_{18}H_{25}NO_4$       | 319,3954    | 111,8 | 50,8 | 45 | 98,5  |
| CMC-50-189-C6A7  | CCT117322 | $C_{18}H_{25}NO_2$       | 287,3966    | 100,6 | 28,5 | 28 | 96,4  |
| CMC-50-189-C6A8  | CCT117308 | $C_{22}H_{23}FN_2O_2$    | 366,4286232 | 128,3 | 4,1  | 3  | 81,4  |
| CMC-50-189-C6A9  | CCT117353 | $C_{23}H_{26}N_2O_3$     | 378,46414   | 132,5 | 3,2  | 2  | 70,6  |
| CMC-50-189-C7A1  | CCT117346 | $C_{15}H_{17}NO_4$       | 275,29978   | 96,4  | 61,8 | 64 | 99,8  |
| CMC-50-189-C7A10 | CCT117343 | $C_{21}H_{20}Cl_2N_2O_3$ | 419,3011    | 146,8 | 31,6 | 22 | 96,1  |
| CMC-50-189-C7A11 | CCT117328 | $C_{17}H_{20}N_2O_4$     | 316,3517    | 110,7 | 55,3 | 50 | 99,2  |
| CMC-50-189-C7A12 | CCT117342 | $C_{25}H_{23}NO_3$       | 385,45502   | 134,9 | 66,4 | 49 | 99,3  |
| CMC-50-189-C7A13 | CCT117378 | $C_{19}H_{19}NO_3$       | 309,35906   | 108,3 | 62,2 | 57 | 99,8  |
| CMC-50-189-C7A14 | CCT117332 | $C_{18}H_{23}NO_3$       | 301,38012   | 105,5 | 22,6 | 21 | 98,4  |
| CMC-50-189-C7A15 | CCT117400 | $C_{15}H_{15}NO_3$       | 257,2845    | 90,0  | 5,6  | 6  | 17,2  |
| CMC-50-189-C7A16 | CCT117379 | $C_{21}H_{22}N_2O_3$     | 350,41098   | 122,6 | 1,4  | 1  | 82,4  |
| CMC-50-189-C7A2  | CCT117320 | $C_{16}H_{19}NO_3$       | 273,32696   | 95,7  | 59,5 | 62 | 98,2  |
| CMC-50-189-C7A3  | CCT117323 | $C_{19}H_{27}NO_3$       | 317,42258   | 111,1 | 62,9 | 57 | 99,5  |
| CMC-50-189-C7A4  | CCT117398 | $C_{17}H_{19}NO_3$       | 285,33766   | 99,9  | 48,3 | 48 | 99,5  |
| CMC-50-189-C7A5  | CCT117334 | $C_{15}H_{17}NO_3$       | 259,30038   | 90,8  | 8,2  | 9  | 90,4  |
| CMC-50-189-C7A6  | CCT117324 | $C_{17}H_{23}NO_5$       | 321,36822   | 112,5 | 76,1 | 68 | 93,4  |
| CMC-50-189-C7A7  | CCT117311 | $C_{17}H_{23}NO_3$       | 289,36942   | 101,3 | 58,8 | 58 | 99,8  |
| CMC-50-189-C7A8  | CCT117390 | $C_{21}H_{21}FN_2O_3$    | 368,4014432 | 128,9 | 5,3  | 4  | 96,7  |
| CMC-50-189-C7A9  | CCT117331 | $C_{22}H_{24}N_2O_4$     | 380,43696   | 133,2 | 48,3 | 36 | 97,9  |
| CMC-50-189-C8A1  | CCT117338 | $C_{15}H_{16}ClNO_4$     | 309,74484   | 108,4 | 25,5 | 24 | 96,0  |
| CMC-50-189-C8A10 | CCT117365 | $C_{21}H_{19}Cl_3N_2O_3$ | 453,74616   | 158,8 | 16,5 | 10 | 92,6  |
| CMC-50-189-C8A11 | CCT117102 | $C_{17}H_{19}ClN_2O_4$   | 350,79676   | 122,8 | 19,1 | 16 | 92,8  |
| CMC-50-189-C8A12 | CCT117361 | $C_{25}H_{22}ClNO_3$     | 419,90008   | 147,0 | 35,6 | 24 | 93,7  |
| CMC-50-189-C8A13 | CCT117307 | $C_{19}H_{18}ClNO_3$     | 343,80412   | 120,3 |      | 0  |       |
| CMC-50-189-C8A14 | CCT117376 | $C_{18}H_{22}ClNO_3$     | 335,82518   | 117,5 | 22,1 | 19 | 100,0 |
| CMC-50-189-C8A15 | CCT117374 | $C_{15}H_{14}ClNO_3$     | 291,72956   | 102,1 | 2,9  | 3  | 29,1  |
| CMC-50-189-C8A16 | CCT117329 | $C_{21}H_{21}ClN_2O_3$   | 384,85604   | 134,7 | 2,0  | 1  | 82,5  |
| CMC-50-189-C8A2  | CCT117333 | $C_{16}H_{18}ClNO_3$     | 307,77202   | 107,7 | 27,6 | 26 | 97,0  |
| CMC-50-189-C8A3  | CCT117355 | $C_{19}H_{26}ClNO_3$     | 351,86764   | 123,2 | 48,1 | 39 | 96,1  |

|                 |           |                         |             |       |      |    |       |
|-----------------|-----------|-------------------------|-------------|-------|------|----|-------|
| CMC-50-189-C8A4 | CCT117337 | $C_{17}H_{18}ClNO_3$    | 319,78272   | 111,9 | 39,3 | 35 | 100,0 |
| CMC-50-189-C8A5 | CCT117317 | $C_{15}H_{16}ClNO_3$    | 293,74544   | 102,8 | 20,5 | 20 | 95,9  |
| CMC-50-189-C8A6 | CCT117341 | $C_{17}H_{22}ClNO_5$    | 355,81328   | 124,5 | 56,5 | 45 | 100,0 |
| CMC-50-189-C8A7 | CCT117336 | $C_{17}H_{22}ClNO_3$    | 323,81448   | 113,3 | 50,7 | 45 | 100,0 |
| CMC-50-189-C8A8 | CCT117372 | $C_{21}H_{20}ClFN_2O_3$ | 402,8465032 | 141,0 | 13,0 | 9  | 98,3  |
| CMC-50-189-C8A9 | CCT117339 | $C_{22}H_{23}ClN_2O_4$  | 414,88202   | 145,2 | 47,0 | 32 | 92,9  |
